# Supplementary material for: Severe acute kidney injury predicting model based on transcontinental databases: a single-centre prospective study
Source: PubMed Central journal article supplement — BMJ Open. 2022 Mar 3;12(3):e054092. doi: 10.1136/bmjopen-2021-054092 (PMC8896056; doi:10.1136/bmjopen-2021-054092), 2022-03-03
Supplement: bmjopen-2021-054092.draft_revisions.pdf [file bmjopen-2021-054092.draft_revisions.pdf]

# BMJ Open

BMJ Open is committed to open peer review. As part of this commitment we make the peer review history of every article we publish publicly available.

When an article is published we post the peer reviewers' comments and the authors' responses online. We also post the versions of the paper that were used during peer review. These are the versions that the peer review comments apply to.

The versions of the paper that follow are the versions that were submitted during the peer review process. They are not the versions of record or the final published versions. They should not be cited or distributed as the published version of this manuscript.

BMJ Open is an open access journal and the full, final, typeset and author-corrected version of record of the manuscript is available on our site with no access controls, subscription charges or pay-per-view fees (<http://bmjopen.bmj.com>).

If you have any questions on BMJ Open's open peer review process please email [info.bmjopen@bmj.com](mailto:info.bmjopen@bmj.com)

# BMJ Open

## Prospective Validation for Severe Acute Kidney Injury Predicting Model based on transcontinental databases

|                               |                                                                                                                                                                                                                                                                                                                                                                                                                                                              |
|-------------------------------|--------------------------------------------------------------------------------------------------------------------------------------------------------------------------------------------------------------------------------------------------------------------------------------------------------------------------------------------------------------------------------------------------------------------------------------------------------------|
| Journal:                      | <i>BMJ Open</i>                                                                                                                                                                                                                                                                                                                                                                                                                                              |
| Manuscript ID                 | bmjopen-2021-054092                                                                                                                                                                                                                                                                                                                                                                                                                                          |
| Article Type:                 | Original research                                                                                                                                                                                                                                                                                                                                                                                                                                            |
| Date Submitted by the Author: | 16-Jun-2021                                                                                                                                                                                                                                                                                                                                                                                                                                                  |
| Complete List of Authors:     | Liang, Qiqiang; Zhejiang University School of Medicine Second Affiliated Hospital<br>Xu, Yongfeng; HealSci Technology Co<br>Zhou, Yu; Zhejiang University School of Medicine Second Affiliated Hospital<br>Chen, Xinyi; Zhejiang University School of Medicine Second Affiliated Hospital<br>Chen, Juan; Zhejiang University School of Medicine Second Affiliated Hospital<br>Huang, Man; Zhejiang University School of Medicine Second Affiliated Hospital, |
| Keywords:                     | Acute renal failure < NEPHROLOGY, INTENSIVE & CRITICAL CARE, Information technology < BIOTECHNOLOGY & BIOINFORMATICS, Adult intensive & critical care < INTENSIVE & CRITICAL CARE                                                                                                                                                                                                                                                                            |
|                               |                                                                                                                                                                                                                                                                                                                                                                                                                                                              |

SCHOLARONE™  
Manuscripts

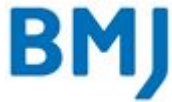

I, the Submitting Author has the right to grant and does grant on behalf of all authors of the Work (as defined in the below author licence), an exclusive licence and/or a non-exclusive licence for contributions from authors who are: i) UK Crown employees; ii) where BMJ has agreed a CC-BY licence shall apply, and/or iii) in accordance with the terms applicable for US Federal Government officers or employees acting as part of their official duties; on a worldwide, perpetual, irrevocable, royalty-free basis to BMJ Publishing Group Ltd ("BMJ") its licensees and where the relevant Journal is co-owned by BMJ to the co-owners of the Journal, to publish the Work in this journal and any other BMJ products and to exploit all rights, as set out in our [licence](#).

The Submitting Author accepts and understands that any supply made under these terms is made by BMJ to the Submitting Author unless you are acting as an employee on behalf of your employer or a postgraduate student of an affiliated institution which is paying any applicable article publishing charge ("APC") for Open Access articles. Where the Submitting Author wishes to make the Work available on an Open Access basis (and intends to pay the relevant APC), the terms of reuse of such Open Access shall be governed by a Creative Commons licence – details of these licences and which [Creative Commons](#) licence will apply to this Work are set out in our licence referred to above.

Other than as permitted in any relevant BMJ Author's Self Archiving Policies, I confirm this Work has not been accepted for publication elsewhere, is not being considered for publication elsewhere and does not duplicate material already published. I confirm all authors consent to publication of this Work and authorise the granting of this licence.

1  
2  
3  
4 **1 Prospective Validation for Severe Acute Kidney Injury Predicting Model based**  
5  
6 **2 on transcontinental databases**  
7  
8

9 Qiqiang Liang<sup>1</sup>; Yongfeng Xu<sup>2</sup>; Yu Zhou<sup>1</sup>; Xinyi Chen<sup>1</sup>, MM; Juan Chen<sup>1</sup>; Man Huang<sup>1\*</sup>  
10

11 <sup>1</sup>General Intensive Care Unit, Second Affiliated Hospital of Zhejiang University School of Medicine, Hangzhou,  
12  
13  
14 China.  
15

16 <sup>2</sup>BSc, HealSci Technology Co., Ltd, Beijing China.  
17

18  
19 \*Corresponding author: Man Huang, MD PhD.  
20

21  
22 Department: General Intensive Care Unit  
23

24  
25 Hospital: Second Affiliated Hospital of Zhejiang University School of Medicine  
26

27  
28 Address: No. 1511, Jianghong Road, Bingjiang District, Hangzhou City, Zhejiang Province  
29

30  
31 Tel: + 86 571 89713427  
32

33  
34 Fax: + 86 571 89713427  
35

36  
37 E-mail: [huangman@zju.edu.cn](mailto:huangman@zju.edu.cn).  
38

39  
40 ORCID: 0000-0002-0842-2254  
41  
42  
43  
44  
45  
46  
47  
48  
49  
50  
51  
52  
53  
54  
55  
56  
57  
58  
59  
60

15

16

17

18

19

20

21

22

1  
2  
3  
4 **23 Abstract:**

5  
6 **24 Objectives:** There are many studies of acute kidney injury (AKI) diagnosis models lack of external  
7  
8  
9 **25 validation and prospective validation.** We constructed the models using three databases to predict severe  
10  
11 **26 AKI within 48 hours in intensive care unit (ICU) patients.**

12  
13  
14 **27 Design:** A retrospective and prospective cohort study.

15  
16  
17 **28 Setting:** We studied critically ill patients in our database (SHZJU-ICU) and two other public databases,  
18  
19 **29 the Medical Information Mart for Intensive Care (MIMIC) and AmsterdamUMC databases, including**  
20  
21 **30 basic demographics, vital signs, and laboratory results. We predicted the diagnosis of severe AKI in**  
22  
23 **31 patients in the next 48 hours using machine-learning algorithms with the three databases. Then, we**  
24  
25 **32 carried out real-time severe AKI prediction in the prospective validation study at our centre for one year.**

26  
27  
28 **33 Participants:** All patients included in three databases with uniform exclusion criteria.

29  
30  
31 **34 Primary and secondary outcome measures:** Effect evaluation index of prediction models.

32  
33  
34 **35 Results:** We included 58492 patients, and a total of 5257 (9.0%) patients met the definition of severe  
35  
36 **36 AKI. In the internal validation of the SHZJU-ICU and MIMIC databases, the best area under the receiver**  
37  
38 **37 operating characteristic curve (AUROC) of the model was 0.86. The external validation results by**  
39  
40 **38 AmsterdamUMC database were also satisfactory, with the best AUROC of 0.86. A total of 2532 patients**  
41  
42 **39 were admitted to the center for prospective validation; 358 positive results were predicted, and 344**  
43  
44 **40 patients were diagnosed with severe AKI, with an accuracy of 83.5% and an AUROC of 0.84.**

45  
46  
47 **41 Conclusion:** The prediction model of severe AKI exhibits promises as a clinical application based on  
48  
49 **42 dynamic vital signs and laboratory results of multi-center databases with prospective and external**  
50  
51 **43 validation.**

52  
53  
54 **44 Keywords:** Machine learning; Acute kidney injury; Real-time prospective validation; External  
55  
56  
57  
58  
59  
60

1  
2  
3  
4 45 validation.

5  
6 46 **Strengths and limitations of this study:**

7  
8  
9 47 An important verification step from artificial intelligence research to clinical use;

10  
11 48 Three large database containing different national populations and regions;

12  
13  
14 49 The prediction model with excellent performance in complete data validation;

15  
16  
17 50 Differences in the samples proportion of three databases;

18  
19  
20 51 The dimensions of variables are not rich enough.

21  
22 52

23  
24 53 **Introduction:**

25  
26  
27 54 Acute kidney injury (AKI), as a common clinical complication in the intensive care unit (ICU),  
28  
29  
30 55 significantly increases the duration of hospitalization and mortality[1]. AKI is divided into three types  
31  
32  
33 56 according to the various aetiologies: prerenal (renal hypoperfusion), intrarenal (vascular, glomerular, or  
34  
35  
36 57 tubulointerstitial lesions), and postrenal (urinary tract obstruction)[2]. Although nearly all diseases  
37  
38  
39 58 associated with ICU admission may cause AKI, acute tubular necrosis (ATN) and prerenal azotaemia  
40  
41  
42 59 are the most common causes[3].

43  
44  
45 60 All AKI diagnostic criteria including the latest Kidney Disease: Improving Global Outcomes (KDIGO)  
46  
47  
48 61 standard are currently based on the creatinine level and urine volume[4]. However, the increase in the  
49  
50  
51 62 creatinine level or decrease in the urine volume lags the onset of AKI[2]. Many studies have suggested  
52  
53  
54 63 that early diagnosis and treatment of reversible AKI can reduce mortality[5]. Therefore, the creatinine  
55  
56  
57 64 level and urine volume are not satisfactory to meet clinical diagnostic demands. Consequently, many  
58  
59  
60 65 researchers have tried to develop an early warning model by analysing the risk factors for AKI[6].

66 Patient complications, such as diabetes, hypertension, cardiovascular disease, chronic liver disease,

1  
2  
3  
4 67 sepsis, and trauma, are identified as important risk factors for AKI[7]. The AKI prediction model and  
5  
6 68 scoring system developed based on high-risk factors has gradually become the focus of research  
7  
8  
9 69 considering the lower clinical application threshold compared with that of new biomarkers[6]. Although  
10  
11 70 most previous prediction models use the multiple logistic regression model, a variety of AKI prediction  
12  
13  
14 71 models based on machine learning have resulted in satisfactory outcomes[6]. Since the first AKI  
15  
16  
17 72 prediction model study based on artificial intelligence was published in 2016, researchers have built more  
18  
19 73 than 20 published AKI prediction models successively by using local or multi-centre databases[6,8-14].  
20  
21  
22 74 The results indicate that these models can predict the occurrence of AKI and the need for renal  
23  
24 75 replacement therapy (RRT) within 24 or 48 hours, with accuracies ranging from 81% to 97%[6,15]. In  
25  
26  
27 76 addition, many studies have focused on subspecialized conditions, including cardiac surgery, trauma,  
28  
29  
30 77 and burns[14-16]. However, the common defect in these studies is the lack of external validation and  
31  
32  
33 78 prospective validation, which causes the prediction model to deviate from the clinical scenarios and limits  
34  
35  
36 79 extrapolation beyond the scope of the data.

37  
38 80 In this study, we built models to predict AKI within 48 hours in critically ill patients by using  
39  
40  
41 81 transcontinental three databases. Then, we evaluated the clinical effect of the model through a one-year  
42  
43  
44 82 prospective validation at our centre.

45  
46 83

## 47 48 84 **Materials and Methods:**

### 49 50 85 **Study Population**

51  
52  
53 86 We collected patients using three ICU databases and prospectively validated the models in our centre.  
54  
55  
56 87 The first database was our centre general ICU database (SHZJU-ICU) of the Second Affiliated Hospital  
57  
58  
59 88 of Zhejiang University School of Medicine, an academic teaching hospital. Since its establishment in  
60

1  
2  
3  
4 89 2017, it has included 12000 ICU patients' data and is updated daily. The Medical Information Mart for  
5  
6 90 Intensive Care (MIMIC) III database, the second one, is an open ICU database provided by the  
7  
8  
9 91 Massachusetts Institute of Technology and includes nearly 60000 ICU patients from North America[17].  
10  
11 92 Lastly, the AmsterdamUMC database is an available European ICU database with health data related to  
12  
13  
14 93 23000 patients admitted to ICUs in parts of Europe[18]. The research flow chart is shown in Figure 1.  
15  
16  
17 94 The study was evaluated and approved by the Ethics Committee of the Second Affiliated Hospital of  
18  
19  
20 95 Zhejiang University School of Medicine as study number 2019-078.

## 21 22 96 **Study definition**

23  
24  
25 97 In this study, the diagnosis of AKI was confirmed based on three stages according to the KDIGO  
26  
27 98 criteria[4]. We defined the patients who met the KDIGO AKI II and III criteria as severe AKI groups  
28  
29  
30 99 and the others as negative groups. We excluded patients with lack of creatinine measurements during  
31  
32  
33 100 admission, patients with creatinine baseline more than 3.0 mg/dL at admission, patients who met severe  
34  
35  
36 101 AKI diagnosis within 24 hours, and patients who used RRT within 48 hours after admission[19]. In  
37  
38 102 addition, we excluded pregnant women, patients younger than 14 years old, and patients hospitalized in  
39  
40  
41 103 the ICU for fewer than 3 days. After the patient was admitted to ICU, we performed a prediction every  
42  
43 104 24 hours and recorded a prediction time. If the patient was diagnosed with severe AKI within 48 hours,  
44  
45  
46 105 the predictive time was defined as a positive predictive point, and the others were defined as a negative  
47  
48 106 point.

## 49 50 51 107 **Data Collection**

52  
53 108 The variables included demographic data, vital signs, basic and primary diseases, laboratory results,  
54  
55  
56 109 important operation records, and drug records. Comorbidity included hypertension, diabetes, cardiopathy,  
57  
58  
59 110 liver disease, and malignant tumors. The primary disease was the main cause of admission to the ICU  
60



1  
2  
3  
4 111 following the ICD-10 codes. The vital signs and clinical laboratory results were transformed into  
5  
6 112 different variables according to the average, variance, maximum, minimum, and final value before  
7  
8  
9 113 diagnosis. We used the Pearson correlation coefficient to analyze the characteristics of the variables,  
10  
11 114 selected the variables with high correlation. We transformed the MIMIC and AmsterdamUMC databases  
12  
13  
14 115 according to our centre database structure, unifying the unit and diagnostic codes. We deleted more than  
15  
16  
17 116 50% of the missing values and replaced the remaining missing values with multiple interpolations. All  
18  
19  
20 117 Missing data between three databases and values included in the model shown in supplementation file  
21  
22 118 Table S1.

### 23 24 25 119 **Model construction and external validation**

26  
27 120 The ratio of the training and internal validation sets was 4:1. The two database training sets were  
28  
29  
30 121 mixed into a new training set. There were more negative data than positive data, so we randomly sampled  
31  
32 122 the negative datasets and constructed a new data subset with a sampling ratio of positive and negative  
33  
34  
35 123 data of 1:5. We used multiple logistic regression, random forest, XGBoost, AdaBoost, LightGBost,  
36  
37 124 gradient boosting decision tree (GBDT), and debug to assess the variables and model-related parameters  
38  
39  
40 125 by the fivefold cross-validation method. After the models were built, we used the SHZJU-ICU and  
41  
42  
43 126 MIMIC test sets for internal validation of the model and the AmsterdamUMC database for external  
44  
45  
46 127 validation. The most appropriate cut-off value was determined according to the K-S curve. The prediction  
47  
48 128 model represents the results of each prediction with a probability between 0 to 1.0. We define results  
49  
50  
51 129 more than 0.6 as high-risk, that is, positive results, and the rest as negative results. Through internal  
52  
53  
54 130 validation and external validation, we calibrated the model by adjusting the super-parameters and using  
55  
56 131 the Platt calibration algorithm and compared the calibration effect by drawing a reliability diagram. The  
57  
58  
59 132 model was visualized and analyzed by a visual programming scheme. All model building and validation  
60

1  
2  
3  
4 133 processes were performed in Python 3.6.  
5

6 134 **Prospective validation**  
7

8  
9 135 The prospective research period was 2020.01.01 to 2020.12.31. We collected real-time data when  
10  
11 136 patients were admitted to the ICU, transformed the data according to the requirements, and formed a  
12  
13 137 complete sample for the prediction model after passing the integrity test. We had established a  
14  
15 138 visualization scheme and allowed researchers to review the predictions daily. The daily prediction results  
16  
17 139 were not publicly accessible during the study to avoid affecting clinicians' decisions, but the diagnosis  
18  
19 140 results were available to the researchers as visual graphics. We sampled the 20% predicted data every  
20  
21 141 month and deleted samples with more than 50% missing values to ensure data correctness. The criteria  
22  
23 142 to terminate prediction were A. a positive diagnosis; B. Transfer out of ICU or death with negative  
24  
25 143 diagnosis. All diagnosis of severe AKI needs to be reviewed by two ICU attending physicians  
26  
27 144 independently, and if the they have different opinion, the third one will be appealed.  
28  
29

30 145 **Statistical analysis:**  
31

32 146 The population characteristics were reported as the medians and inter-quartile ranges (IQRs) for  
33  
34 147 skewed data and the means and standard deviations for normally distributed data. The independent  
35  
36 148 sample T-test was used for normally distributed data, and the rank-sum test was used for the rest.  
37  
38 149 Dichotomous variables were assessed by the chi-square test, and a P value less than 0.05 was considered  
39  
40 150 statistically significant. The non-normally distributed data were analyzed by exponential transformation  
41  
42 151 and logarithmic transformation, and the variables that did not reach a normal distribution were deleted.  
43  
44 152 The effect of the model was evaluated by parameters such as the AUROC, accuracy, specificity, and F1-  
45  
46 153 score.  
47  
48  
49  
50  
51  
52  
53  
54  
55  
56  
57  
58  
59  
60

1  
2  
3  
4 **155 Results:**

5  
6 **156** According to the inclusion criteria and exclusion criteria, we selected 58492 patients from three  
7  
8  
9 **157** databases who met the requirements of the study, including 6461 patients from the SHZJU-ICU database,  
10  
11 **158** 36690 patients from the MIMIC database, and 15341 patients from the AmsterdamUMC database. A  
12  
13  
14 **159** total of 5257 (9.0%) patients met the definition of severe AKI (11.8% in SHZJU-ICU, 7.6% in MIMIC,  
15  
16  
17 **160** and 10.9% in AmsterdamUMC). The distributions of age and sex in the three centers were similar, but  
18  
19 **161** the differences in race were large. Asian patients accounted for more than 99% in the SHZJU-ICU  
20  
21 **162** database, and only approximately 2.5% in the MIMIC database. White people accounted for more than  
22  
23  
24 **163** 70% of the MIMIC database. In addition, patients from the MIMIC database had a higher incidence of  
25  
26  
27 **164** the tumor, liver cirrhosis, diabetes, and hypertension. Patients in the AmsterdamUMC and SHZJU-ICU  
28  
29  
30 **165** databases had a higher proportion of mechanical ventilation and overall survival rate. Severe AKI  
31  
32  
33 **166** patients had longer ICU hospital stays and higher mortality. More details are presented in Table 1.  
34  
35 **167** Table 1: Clinical Demographics and Outcomes in patients with or without severe acute  
36 **168** kidney injury.

|                                                 | SHZJU-ICU<br>Negative<br>(N=5695) | SHZJU-ICU<br>Severe AKI<br>(N=766) | P-<br>valu<br>e | MIMIC<br>Negative<br>(N=33879) | MIMIC<br>Severe AKI<br>(N=2811) | P-<br>value | AmsterdamUMC<br>Negative<br>(N=13661) | AmsterdamUMC<br>severe AKI<br>(N=1680) | P-<br>value |
|-------------------------------------------------|-----------------------------------|------------------------------------|-----------------|--------------------------------|---------------------------------|-------------|---------------------------------------|----------------------------------------|-------------|
| <b>Age, median [IQR]</b>                        | 60.5<br>[48.8-70.1]               | 62.1<br>[50.1-72.5]                | 0.00<br>4       | 62.0<br>[45.0-76.0]            | 64.0<br>[52.0-76.0]             | <0.001      | 64.5<br>[54.5,74.5]                   | 64.3<br>[52.5,78.5]                    | 0.04        |
| <b>Gender, male (%)</b>                         | 3561 (64.9)                       | 438 (59.8)                         | 0.00<br>7       | 18976 (56.0)                   | 1524 (54.2)                     | 0.06        | 8920 (65.3)                           | 1054 (63.9)                            | 0.03        |
| <b>Race</b>                                     |                                   |                                    |                 |                                |                                 |             | /                                     | /                                      | /           |
| <b>White</b>                                    | 3 (0.05)                          | 1 (0.1)                            | 1               | 23796 (70.2)                   | 2005 (71.3)                     | 0.23        | /                                     | /                                      | /           |
| <b>Black</b>                                    | 1 (0.02)                          | 0                                  | 1               | 2455 (7.2)                     | 199 (7.1)                       | 0.45        | /                                     | /                                      | /           |
| <b>Asian</b>                                    | 5691(99.9)                        | 764 (99.7)                         | 1               | 918 (2.7)                      | 70 (2.5)                        | 0.54        | /                                     | /                                      | /           |
| <b>Other</b>                                    | 0                                 | 1 (0.1)                            | 1               | 6710 (19.8)                    | 537 (19.1)                      | 0.34        | /                                     | /                                      | /           |
| <b>Admission Scr<br/>(mg/dL), mean<br/>(sd)</b> | 0.9 (0.34)                        | 1.0 (0.40)                         | <0.0<br>01      | 1.1 (0.41)                     | 1.1 (0.50)                      | 0.04        | 1.2 (0.35)                            | 1.1 (0.38)                             | <0.00<br>1  |

1  
2  
3  
4  
5  
6  
7  
8  
9  
10  
11  
12  
13  
14  
15  
16  
17  
18  
19  
20  
21  
22  
23  
24  
25  
26  
27  
28  
29  
30  
31  
32  
33  
34  
35  
36  
37  
38  
39  
40  
41  
42  
43  
44  
45  
46  
47  
48  
49  
50  
51  
52  
53  
54  
55  
56  
57  
58  
59  
60

|                            |              |              |      |              |              |        |             |              |       |
|----------------------------|--------------|--------------|------|--------------|--------------|--------|-------------|--------------|-------|
| <b>Admission BUN</b>       | 18 (11)      | 21 (9)       | <0.0 | 17 (12)      | 23 (12)      | <0.001 | 18 (13)     | 23 (10)      | <0.00 |
| <b>(mg/dL), mean</b>       |              |              | 01   |              |              |        |             |              | 1     |
| <b>(sd)</b>                |              |              |      |              |              |        |             |              |       |
| <b>Cancer, n (%)</b>       | 644 (11.3)   | 48 (6.3)     | <0.0 | 6652 (19.6)  | 752 (26.8)   | <0.001 | /           | /            | /     |
|                            |              |              | 01   |              |              |        |             |              |       |
| <b>Cirrhosis, n (%)</b>    | 43 (0.8)     | 6 (0.8)      | 0.89 | 1180 (3.5)   | 426 (15.2)   | <0.001 | /           | /            | /     |
| <b>Cardiopathy, n (%)</b>  | 231 (4.1)    | 42 (5.5)     | 0.08 | 4840 (14.3)  | 336 (12.0)   | 0.001  | /           | /            | /     |
| <b>Diabetes, n (%)</b>     | 305 (5.4)    | 63 (8.2)     | 0.00 | 7250 (21.4)  | 789 (28.1)   | <0.001 | /           | /            | /     |
|                            |              |              | 2    |              |              |        |             |              |       |
| <b>Hypertension, n (%)</b> | 889 (15.6)   | 115 (15.0)   | 0.70 | 16328 (48.2) | 1513 (53.8)  | <0.001 | /           | /            | /     |
| <b>Ventilation, n (%)</b>  | 2569 (45.1)  | 592 (77.3)   | <0.0 | 13009 (38.4) | 1503(53.5)   | <0.001 | 7718(56.5)  | 1248(74.3)   | <0.00 |
|                            |              |              | 01   |              |              |        |             |              | 1     |
| <b>Operation, n (%)</b>    | 3361 (59.1)  | 373 (48.7)   | <0.0 | 12455 (36.7) | 1430 (50.8)  | <0.001 | /           | /            | /     |
|                            |              |              | 01   |              |              |        |             |              |       |
| <b>ICU Hours,</b>          | 50.8         | 164.4        | <0.0 | 51.0         | 103.4        | <0.001 | 24.0        | 142.0        | <0.00 |
| <b>median [IQR]</b>        | [23.0-139.5] | [70.3-328.6] | 01   | [28.5-110.3] | [50.1-261.3] |        | [19.8,63.5] | [45.4,394.2] | 1     |
| <b>Survived, n (%)</b>     | 4997 (87.7)  | 380 (49.6)   | <0.0 | 25648 (75.7) | 1356 (48.2)  | <0.001 | 10942(80.1) | 1033 (61.5)  | <0.00 |
|                            |              |              | 01   |              |              |        |             |              | 1     |

169 SHZJU-ICU: The general ICU database of the second affiliated hospital of Zhejiang university  
 170 school of medicine; MIMIC: Medical Information Mart for Intensive Care; IQR: Inter-Quartile  
 171 Range; ICU: Intensive Care Unit; AKI: Acute Kidney Injury. Scr: serum creatinine; BUN: blood  
 172 urea nitrogen.

173 There were significant differences in the important parameters of the variables among the different  
 174 models (see Figure S1). However, the trend of the creatinine level in the past week was still an important  
 175 variable, followed by urine volume, blood urea nitrogen level, temperature, and length of ICU stay. The  
 176 cut-off value used to distinguish between a negative and positive prediction was determined by the K-S  
 177 curve, with value of 0.423 (see Figure S2). The GBDT model had the best prediction effect in the test  
 178 set, followed by XGBoost and LightGBoost. In the two central internal validation sets, the two best-  
 179 performing machine learning algorithms with great AUROC are LightGBoost (SHZJU-ICU of 83.2%,  
 180 MIMIC of 86.0%) and XGBoost (SHZJU-ICU 85.9%, MIMIC 85.6%), as detailed in Figure 2. Overall,  
 181 the sensitivity (SHZJU-ICU 0.84, MIMIC 0.83) and the negative predictive value (SHZJU-ICU 0.90,  
 182 MIMIC 0.90) of the predictive model were high, but the specificity was general (SHZJU-ICU 0.79,

183 MIMIC 0.75), as shown in Table 2. In the external validation based on AmsterdamUMC database, the  
 184 overall model validation effect results were satisfactory, and XGBoost had the best performance, with  
 185 an AUROC of 0.84, as shown in Figure 2 and Table 2. We built a visual prediction interface based on  
 186 the prediction model (supplementation file Figure S3).

187

188 Table 2: Model validation results by three databases with machine learning algorithm

| <i>Model</i>                                          | <i>AUROC</i> | <i>Accuracy</i> | <i>Sensitivity</i> | <i>Sepecificity</i> | <i>PPV</i> | <i>NPV</i> | <i>F1</i> |
|-------------------------------------------------------|--------------|-----------------|--------------------|---------------------|------------|------------|-----------|
| <b>Internal validation with SHZJU-ICU database</b>    |              |                 |                    |                     |            |            |           |
| <i>Logistic regression</i>                            | 0.748        | 0.662           | 0.834              | 0.576               | 0.496      | 0.874      | 0.622     |
| <i>LightGBoost</i>                                    | 0.832        | 0.741           | 0.839              | 0.692               | 0.576      | 0.896      | 0.683     |
| <i>GBDT</i>                                           | 0.845        | 0.765           | 0.843              | 0.725               | 0.606      | 0.902      | 0.705     |
| <i>AdaBoost</i>                                       | 0.806        | 0.721           | 0.824              | 0.67                | 0.555      | 0.884      | 0.663     |
| <i>Random Forest</i>                                  | 0.821        | 0.763           | 0.71               | 0.789               | 0.627      | 0.845      | 0.666     |
| <i>XGBoost</i>                                        | <b>0.859</b> | 0.779           | 0.81               | 0.763               | 0.631      | 0.889      | 0.709     |
| <b>Internal validation with MIMIC database</b>        |              |                 |                    |                     |            |            |           |
| <i>Logistic regression</i>                            | 0.733        | 0.695           | 0.643              | 0.72                | 0.535      | 0.801      | 0.584     |
| <i>LightGBoost</i>                                    | <b>0.86</b>  | 0.768           | 0.822              | 0.741               | 0.613      | 0.893      | 0.702     |
| <i>GBDT</i>                                           | 0.846        | 0.765           | 0.786              | 0.755               | 0.616      | 0.876      | 0.691     |
| <i>AdaBoost</i>                                       | 0.837        | 0.732           | 0.831              | 0.683               | 0.567      | 0.89       | 0.674     |
| <i>Random Forest</i>                                  | 0.832        | 0.738           | 0.791              | 0.712               | 0.578      | 0.872      | 0.668     |
| <i>XGBoost</i>                                        | 0.856        | 0.758           | 0.833              | 0.721               | 0.598      | 0.895      | 0.695     |
| <b>External validation with AmsterdamUMC database</b> |              |                 |                    |                     |            |            |           |
| <i>Logistic regression</i>                            | 0.704        | 0.767           | 0.516              | 0.893               | 0.706      | 0.787      | 0.596     |
| <i>LightGBoost</i>                                    | 0.859        | 0.763           | 0.827              | 0.731               | 0.606      | 0.894      | 0.7       |
| <i>GBDT</i>                                           | 0.861        | 0.764           | 0.84               | 0.727               | 0.606      | 0.901      | 0.704     |
| <i>AdaBoost</i>                                       | 0.85         | 0.755           | 0.813              | 0.726               | 0.597      | 0.886      | 0.689     |
| <i>Random Forest</i>                                  | 0.82         | 0.743           | 0.77               | 0.729               | 0.587      | 0.864      | 0.666     |
| <i>XGBoost</i>                                        | <b>0.865</b> | 0.75            | 0.873              | 0.688               | 0.584      | 0.916      | 0.7       |
| <b>Prospective validation with SHZJU-ICU</b>          |              |                 |                    |                     |            |            |           |
| <i>Logistic regression</i>                            | 0.758        | 0.772           | 0.648              | 0.834               | 0.662      | 0.826      | 0.655     |
| <i>LightGBoost</i>                                    | 0.819        | 0.796           | 0.596              | 0.895               | 0.74       | 0.816      | 0.66      |
| <i>GBDT</i>                                           | 0.827        | 0.781           | 0.706              | 0.818               | 0.66       | 0.848      | 0.683     |
| <i>AdaBoost</i>                                       | 0.808        | 0.766           | 0.686              | 0.805               | 0.638      | 0.837      | 0.661     |
| <i>Random Forest</i>                                  | 0.804        | 0.755           | 0.715              | 0.775               | 0.613      | 0.845      | 0.66      |
| <i>XGBoost</i>                                        | <b>0.841</b> | 0.779           | 0.724              | 0.807               | 0.652      | 0.854      | 0.686     |

189 AUROC: Area Under Receiver Operating Characteristic; PPV: Positive Predictive Value; NPV:  
 190 Negative Predictive Value; SHZJU-ICU: The general ICU database of the second affiliated

1  
2  
3 191 hospital of Zhejiang university school of medicine; *MIMIC*: Medical Information Mart for  
4 192 Intensive Care; *GBDT*: Gradient Boosted Decision Tree.

5  
6 193

7  
8  
9 194 According to the inclusion and exclusion criteria, we delete 267 patients among 94 patients with  
10  
11 195 creatinine baseline more than 3.0 mg/dL at admission, 39 patients met severe AKI diagnosis within 24  
12  
13 196 hours, and 26 patients who used RRT within 48 hours after admission, 108 patients hospitalized in the  
14  
15 197 ICU for fewer than 3 days. A total of 2532 patients were admitted to our centre for prospective validation,  
16  
17 198 and the prediction model made 16858 times predictions. In the prospective cohort, there was no  
18  
19 199 significant difference in age, gender, baseline creatinine and urea nitrogen, and complications. The  
20  
21 200 proportion of mechanical ventilation and the ICU stay time in AKI patients were longer with higher  
22  
23 201 mortality. Above all, there was no significant difference between the prospective and the retrospective  
24  
25 202 cohort. More detail sees in supplementation file Table S2. In the end, 358 positive results were predicted,  
26  
27 203 and the rest were negative results. There are 344 patients with severe AKI were diagnosed and the  
28  
29 204 prediction accuracy was 83.5%. The model with the highest area under the curve was XGBoost, 0.84.  
30  
31 205 The results of the prospective study are similar to those of the external validation of the model, and are  
32  
33 206 relatively stable. More detail is presented in Figure 3 and Table 2.

34  
35  
36  
37  
38  
39  
40  
41  
42  
43 207 **Discussion:**

44  
45 208 In this study, we built predictive models by machine learning to predict the incidence of severe AKI  
46  
47 209 with three databases in different regions and in the next 48 hours. After internal and external validation,  
48  
49 210 prospective validation over one year was carried out to verify the model effects. The three databases  
50  
51 211 come from three countries that are in Asia, Europe, and North America, which proves that the model is  
52  
53 212 universal to some extent.

54  
55  
56  
57  
58 213 Despite the huge amount of data, many databases are still not suitable for prospective research  
59  
60

1  
2  
3  
4 214 because they are not updated promptly. Tomasev, N and colleagues have provided research on AKI  
5  
6 215 prediction models with a large amount of data[10]. The study covered 703782 adult patients with 6 billion  
7  
8  
9 216 individual items, including 620000 elements. In this study, a depth neural network model was used for  
10  
11  
12 217 real-time prediction. A total of 55.8% of severe AKI patients were predicted within the first 48 hours,  
13  
14 218 although each accurate prediction was accompanied by two mispredictions[10]. This study provided a  
15  
16  
17 219 new scheme for real-time prediction and indicated that we should prospectively evaluate and  
18  
19  
20 220 independently validate models to explore their effectiveness. In a prospective study, Marine, F compared  
21  
22 221 an AKI prediction model with clinicians in 252 patients and found that the clinical effect of the random  
23  
24 222 forest model for predicting AKI-II/III was equivalent to that of clinicians. Our prediction model graphical  
25  
26  
27 223 visualization of the model was installed in the centre's database for better usage. In addition, our database  
28  
29  
30 224 is updated daily to achieve daily predictions and present the results to researchers. In the prospective  
31  
32  
33 225 validation of our study, the stability of the prediction model confirmed its promise, which provides a  
34  
35 226 basis for future research.

36  
37  
38 227 There are many studies of artificial intelligence for predicting the occurrence of AKI, but most of them  
39  
40 228 are single-centre studies, and the extrapolation effect has been controversial. In 2016, Koyner, J, and his  
41  
42  
43 229 colleague published the first study of an AKI prediction model based on multi-centre data. In all 202961  
44  
45 230 patients, 17541 (8.6%) had AKI, 4251 (3.5%) had AKI-II, and 1242 (0.6%) had AKI-III. A multivariate  
46  
47  
48 231 logistic regression model was used to predict AKI in this study with an AUROC of 0.74 (95% CI=0.74).  
49  
50  
51 232 With the classification of AKI, the AUROC of the prediction model gradually increased to 0.84[8].  
52  
53  
54 233 Subsequently, the study team used a new machine learning algorithm, to build a more accurate model to  
55  
56 234 predict the occurrence of AKI-II, with an AUROC of 0.9 within 24 hours and 0.87 within 48 hours[19].  
57  
58  
59 235 Recently, the research team included data from two other centres, namely, LUMC (N=200613) and NUS  
60

1  
2  
3  
4 236 (N=246895), to externally validate the AKI-II prediction model with AUROCs reaching 0.85 to 0.86,  
5  
6 237 suggesting that the artificial intelligence model has stable predictive ability[12]. This series of studies  
7  
8  
9 238 included many data points, suggesting the feasibility of artificial intelligence in the diagnosis of AKI,  
10  
11 239 but the proportion of positive patients (3.5%) and ICU patients (30%) was too low to properly predict  
12  
13 240 AKI. Our research is similar to the above. The SAHZJU-ICU database is a single-centre database  
14  
15 241 representing south-eastern China, and the MIMIC database is a well-known open ICU database in the  
16  
17 242 United States. The AmsterdamUMC database is a public database located in Europe. The population  
18  
19 243 structure and diseases in the three databases are complete but different in the distribution of complications  
20  
21 244 and race. Therefore, it provides a prediction model with unparalleled stability compared with other  
22  
23 245 studies.

24 246 Limitations:

25 247 This retrospective multi-centre study was unable to carry out more clinical feature mining and  
26  
27 248 comparison because of different data structures. The differences between the three databases partly  
28  
29 249 reflect some demographic differences between Europe, the United States and China, resulting in a decline  
30  
31 250 in the accuracy of the prediction model. There are some differences in the number of patients included  
32  
33 251 in the three databases, which may affect the choice of variables. Second, in the prospective data study in  
34  
35 252 2020, there may be deviations in the inclusion of patients in the centre, thus affecting the interpretation  
36  
37 253 of the follow-up forward-looking results. Finally, given the low incidence of severe AKI and the great  
38  
39 254 difference in the proportion of positive and negative samples, the data may be accidental.

40 255

41 256 **Conclusion:**

42 257 Based on databases of patients of different races from different countries, we constructed stable



1  
2  
3  
4 258 machine learning models to predict the occurrence of AKI in the next 48 hours. Prospective validation  
5  
6 259 through the implementation of an updated local database is an effective exploration of further research.  
7  
8

9 260

10  
11 261 Data Availability Statement:

12  
13  
14 262 The model code can be obtained by email if readers need it, but we cannot guarantee that all the  
15  
16  
17 263 code will be provided. Two public databases can be applied from the official website of their respective  
18  
19 264 databases.

20  
21  
22 265 Ethics approval:

23  
24  
25 266 Our research was approved by the ethics committee of the Second Affiliated Hospital of Zhejiang  
26  
27 267 University School of Medicine.

28  
29  
30 268

31  
32 269 **Reference:**

- 33  
34  
35 270 1. Ronco, C.; Bellomo, R.; Kellum, J.A. Acute kidney injury. *The Lancet* **2019**, *394*, 1949-  
36  
37 271 1964, doi:10.1016/s0140-6736(19)32563-2.  
38  
39  
40 272 2. Pakula, A.M.; Skinner, R.A. Acute Kidney Injury in the Critically Ill Patient: A Current  
41  
42  
43 273 Review of the Literature. *J Intensive Care Med* **2016**, *31*, 319-324,  
44  
45 274 doi:10.1177/0885066615575699.  
46  
47  
48 275 3. Bellomo, R.; Kellum, J.A.; Ronco, C. Acute kidney injury. *The Lancet* **2012**, *380*, 756-  
49  
50 276 766, doi:10.1016/s0140-6736(11)61454-2.  
51  
52  
53 277 4. Khwaja, A. KDIGO clinical practice guidelines for acute kidney injury. *Nephron Clin*  
54  
55 278 *Pract* **2012**, *120*, c179-184, doi:10.1159/000339789.  
56  
57  
58 279 5. Coelho, S.; Cabral, G.; Lopes, J.A.; Jacinto, A. Renal regeneration after acute kidney  
59  
60

- 1  
2  
3  
4 280 injury. *Nephrology (Carlton)* **2018**, *23*, 805-814, doi:10.1111/nep.13256.
- 5  
6 281 6. Wilson, F.P.; Greenberg, J.H. Acute Kidney Injury in Real Time: Prediction, Alerts, and  
7  
8  
9 282 Clinical Decision Support. *Nephron* **2018**, *140*, 116-119, doi:10.1159/000492064.
- 10  
11 283 7. Wu, Y.; Hao, W.; Chen, Y.; Chen, S.; Liu, W.; Yu, F.; Hu, W.; Liang, X. Clinical features,  
12  
13  
14 284 risk factors, and clinical burden of acute kidney injury in older adults. *Ren Fail* **2020**,  
15  
16  
17 285 *42*, 1127-1134, doi:10.1080/0886022X.2020.1843491.
- 18  
19 286 8. Koyner, J.L.; Adhikari, R.; Edelson, D.P.; Churpek, M.M. Development of a Multicenter  
20  
21  
22 287 Ward-Based AKI Prediction Model. *Clin J Am Soc Nephrol* **2016**, *11*, 1935-1943,  
23  
24  
25 288 doi:10.2215/CJN.00280116.
- 26  
27 289 9. Low, S.; Vathsala, A.; Murali, T.M.; Pang, L.; MacLaren, G.; Ng, W.Y.; Haroon, S.;  
28  
29  
30 290 Mukhopadhyay, A.; Lim, S.L.; Tan, B.H., et al. Electronic health records accurately  
31  
32  
33 291 predict renal replacement therapy in acute kidney injury. *BMC Nephrol* **2019**, *20*, 32,  
34  
35 292 doi:10.1186/s12882-019-1206-4.
- 36  
37 293 10. Tomasev, N.; Glorot, X.; Rae, J.W.; Zielinski, M.; Askham, H.; Saraiva, A.; Mottram, A.;  
38  
39  
40 294 Meyer, C.; Ravuri, S.; Protsyuk, I., et al. A clinically applicable approach to continuous  
41  
42  
43 295 prediction of future acute kidney injury. *Nature* **2019**, *572*, 116-119,  
44  
45 296 doi:10.1038/s41586-019-1390-1.
- 46  
47 297 11. Flechet, M.; Falini, S.; Bonetti, C.; Güiza, F.; Schetz, M.; Van den Berghe, G.; Meyfroidt,  
48  
49  
50 298 G. Machine learning versus physicians' prediction of acute kidney injury in critically ill  
51  
52  
53 299 adults: a prospective evaluation of the AKIpredictor. *Critical Care* **2019**, *23*, 282,  
54  
55 300 doi:10.1186/s13054-019-2563-x.
- 56  
57  
58 301 12. Churpek, M.M.; Carey, K.A.; Edelson, D.P.; Singh, T.; Astor, B.C.; Gilbert, E.R.;
- 59  
60

- 1  
2  
3  
4 302 Winslow, C.; Shah, N.; Afshar, M.; Koyner, J.L. Internal and External Validation of a  
5  
6 303 Machine Learning Risk Score for Acute Kidney Injury. *JAMA Netw Open* **2020**, *3*,  
7  
8  
9 304 e2012892, doi:10.1001/jamanetworkopen.2020.12892.  
10  
11  
12 305 13. Yuan, Q.; Zhang, H.; Deng, T.; Tang, S.; Yuan, X.; Tang, W.; Xie, Y.; Ge, H.; Wang,  
13  
14 306 X.; Zhou, Q., et al. Role of Artificial Intelligence in Kidney Disease. *Int J Med Sci* **2020**,  
15  
16 307 *17*, 970-984, doi:10.7150/ijms.42078.  
17  
18  
19 308 14. Li, Y.; Xu, J.; Wang, Y.; Zhang, Y.; Jiang, W.; Shen, B.; Ding, X. A novel machine  
20  
21 309 learning algorithm, Bayesian networks model, to predict the high-risk patients with  
22  
23 310 cardiac surgery-associated acute kidney injury. *Clin Cardiol* **2020**, *43*, 752-761,  
24  
25 311 doi:10.1002/clc.23377.  
26  
27  
28 312 15. De Vlieger, G.; Kashani, K.; Meyfroidt, G. Artificial intelligence to guide management  
29  
30 313 of acute kidney injury in the ICU: a narrative review. *Curr Opin Crit Care* **2020**, *26*, 563-  
31  
32 314 573, doi:10.1097/MCC.0000000000000775.  
33  
34  
35 315 16. James, M.T.; Pannu, N.; Hemmelgarn, B.R.; Austin, P.C.; Tan, Z.; McArthur, E.; Manns,  
36  
37 316 B.J.; Tonelli, M.; Wald, R.; Quinn, R.R., et al. Derivation and External Validation of  
38  
39 317 Prediction Models for Advanced Chronic Kidney Disease Following Acute Kidney Injury.  
40  
41 318 *JAMA* **2017**, *318*, 1787-1797, doi:10.1001/jama.2017.16326.  
42  
43  
44 319 17. Johnson, A.E.; Pollard, T.J.; Shen, L.; Lehman, L.W.; Feng, M.; Ghassemi, M.; Moody,  
45  
46 320 B.; Szolovits, P.A.-O.; Celi, L.A.; Mark, R.A.-O. MIMIC-III, a freely accessible critical  
47  
48 321 care database.  
49  
50  
51 322 18. Thorat, P.J.; Peppink, J.M.; Driessen, R.H.; Sijbrands, E.J.G.; Kompanje, E.J.O.;  
52  
53 323 Kaplan, L.; Bailey, H.; Kesecioglu, J.; Cecconi, M.; Churpek, M., et al. Sharing ICU  
54  
55  
56  
57  
58  
59  
60

- 1  
2  
3  
4 324 Patient Data Responsibly Under the Society of Critical Care Medicine/European  
5  
6 325 Society of Intensive Care Medicine Joint Data Science Collaboration: The Amsterdam  
7  
8  
9 326 University Medical Centers Database (AmsterdamUMCdb) Example. *Crit Care Med*  
10  
11 327 **2021**, 10.1097/CCM.0000000000004916, doi:10.1097/CCM.0000000000004916.  
12  
13  
14 328 19. Koyner, J.L.; Carey, K.A.; Edelson, D.P.; Churpek, M.M. The Development of a  
15  
16  
17 329 Machine Learning Inpatient Acute Kidney Injury Prediction Model. *Crit Care Med* **2018**,  
18  
19 330 *46*, 1070-1077, doi:10.1097/CCM.0000000000003123.  
20  
21  
22 331

23  
24  
25 332 **Footnotes**

26  
27 333 Contributions: Conceptualization, QL and MH; Methodology, YX; Software, YX; Validation, YZ, and  
28  
29 334 YX.; Formal Analysis, JC and XC; Resources, MH; Data Curation, QL; Writing – Original Draft  
30  
31 335 Preparation, QL; Writing – Review & Editing, MH; Visualization, YX; Supervision, YZ and QL; Project  
32  
33 336 Administration, QL;

34  
35  
36  
37 337 **Funding:** This research received no specific grant from any funding agency in the public, commercial  
38  
39 338 or not-for-profit sectors.

40  
41  
42 339 Conflicts of Interest: Not Applicable.

43  
44  
45 340 Patient and public involvement Patients and/or the public were not involved in the design, or conduct, or  
46  
47 341 reporting, or dissemination plans of this research.

48  
49 342 Provenance and peer review Not commissioned; externally peer reviewed.

50  
51  
52 343 Acknowledgements: Thank my colleagues in general ICU for cooperating with us in our prospective  
53  
54 344 study. Thanks to two public databases namely MIMIC and AmsterdamUMC for providing important  
55  
56 345 data.  
57  
58  
59  
60

1  
2  
3  
4 346

5  
6 347 **Supplemental Figure:**

7  
8  
9 348 File name: **Figure S1.tif**

10  
11 349 Title and Description of data: The variable importance parameter histogram of early diagnosis prediction  
12  
13  
14 350 models of severe AKI uses a multiple logistic regression algorithm and five machine learning algorithms.

15  
16  
17 351 File name: **Figure S2.tif**

18  
19 352 Title and Description of data: The K-S curve used to determine the cut-off value of positive and negative  
20  
21  
22 353 diagnosis of early diagnosis prediction models of severe AKI.

23  
24  
25 354 File name: **Figure S3.tif**

26  
27 355 Title of data: The visual interface for prospective studies of the AKI early diagnosis prediction models.

28  
29  
30 356 Description of data: Different patients have independent card display information, in which the last line  
31  
32  
33 357 of the card is the AKI diagnosis. The visual interface was not available to doctors during the prospective  
34  
35  
36 358 study and was used only by the researchers to verify the diagnosis and for sampling verification.

37  
38 359 File name: **Table S1.docx**

39  
40 360 Title and of Description data: Missing data between three databases in the study and values included in  
41  
42  
43 361 the model.

44  
45  
46 362 File name: **Table S2.docx**

47  
48 363 Title and of Description data: Clinical Demographics and Outcomes of SHZJU-ICU patients in model  
49  
50  
51 364 building set and prospective validation.

52  
53  
54 365 File name: **Table S3.docx**

55  
56 366 Title of data: TRIPOD Checklist of Prediction Model Development and Validation

57  
58  
59 367 Description of data: Writing norms of this type of research.  
60

1  
2  
3  
4 368

5  
6 369 **Figure Legend:**

7  
8  
9 370 Figure 1: The research flow chart. The data collection time interval of the study was 7 days before  
10  
11 371 diagnosis and the prediction interval was 48 hours. The early prediction model of AKI diagnosis was  
12  
13 372 constructed and verified by our database and the MIMIC database and incorporated into the  
14  
15 373 AmsterdamUMC database for external validation. We carried out a one-year prospective validation  
16  
17 374 through the database of the centre.

18  
19 375 Figure 2: The AUROC curve of the internal validation set of the SHZJU-ICU database and the MIMIC  
20  
21 376 database.

22  
23 377 Figure 3: The AUROC curve of the external validation set of the AmsterdamUMC database for 3A and  
24  
25 378 the prospective validation in our center for 3B.  
26  
27  
28  
29  
30  
31  
32  
33  
34  
35  
36  
37  
38  
39  
40  
41  
42  
43  
44  
45  
46  
47  
48  
49  
50  
51  
52  
53  
54  
55  
56  
57  
58  
59  
60

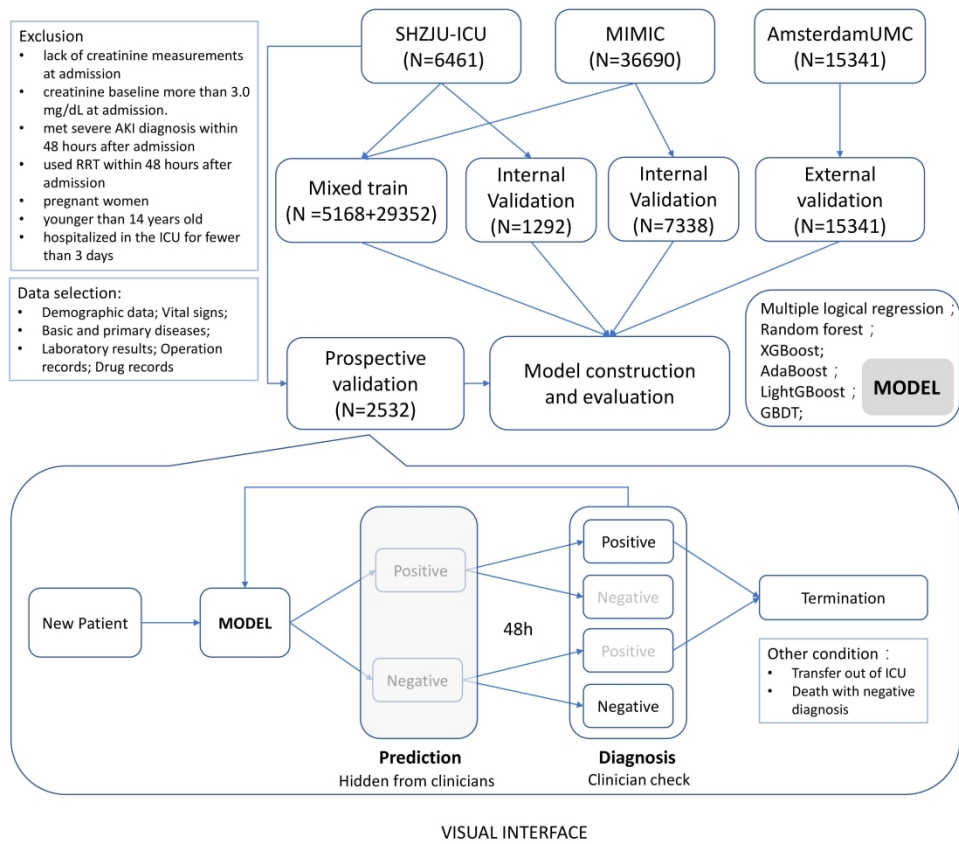

Internal validation set ROC curves

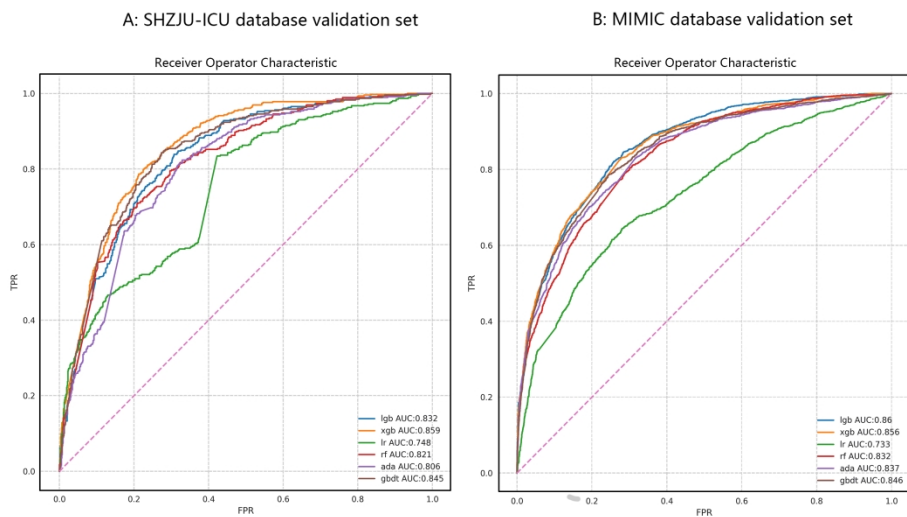

Figure 2: The AUROC curve of the internal validation set of the SHZJU-ICU database and the MIMIC database.



1  
2  
3  
4  
5  
6  
7  
8  
9  
10  
11  
12  
13  
14  
15  
16  
17  
18  
19  
20  
21  
22  
23  
24  
25  
26  
27  
28  
29  
30  
31  
32  
33  
34  
35  
36  
37  
38  
39  
40  
41  
42  
43  
44  
45  
46  
47  
48  
49  
50  
51  
52  
53  
54  
55  
56  
57  
58  
59  
60

### External and prospective validation set ROC curves

A: AmsterdamUMC database external validation set      B: SHZJU-ICU database prospective validation set

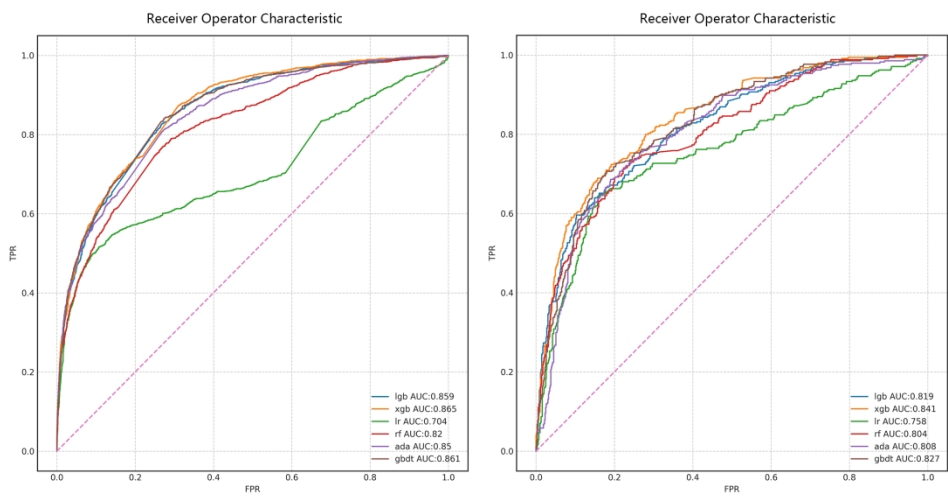

Figure 3: The AUROC curve of the external validation set of the AmsterdamUMC database for 3A and the prospective validation in our center for 3B.

**Supplemental Figure:**

File name: **Figure S1.tif**

Title and Description of data: The variable importance parameter histogram of early diagnosis prediction models of severe AKI uses a multiple logistic regression algorithm and five machine learning algorithms.

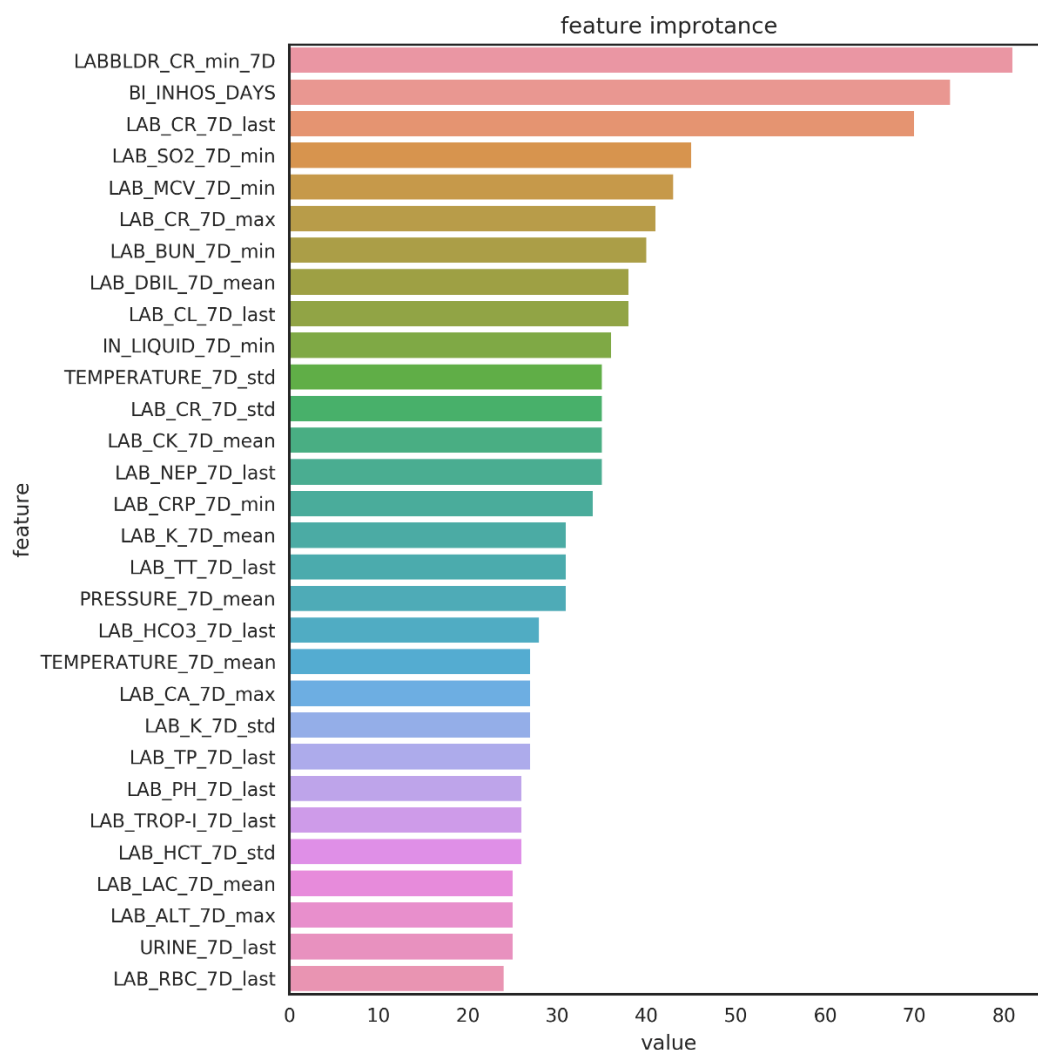

File name: **Figure S2.tif**

Title and Description of data: The K-S curve used to determine the cut-off value of positive and negative diagnosis of early diagnosis prediction models of severe AKI.

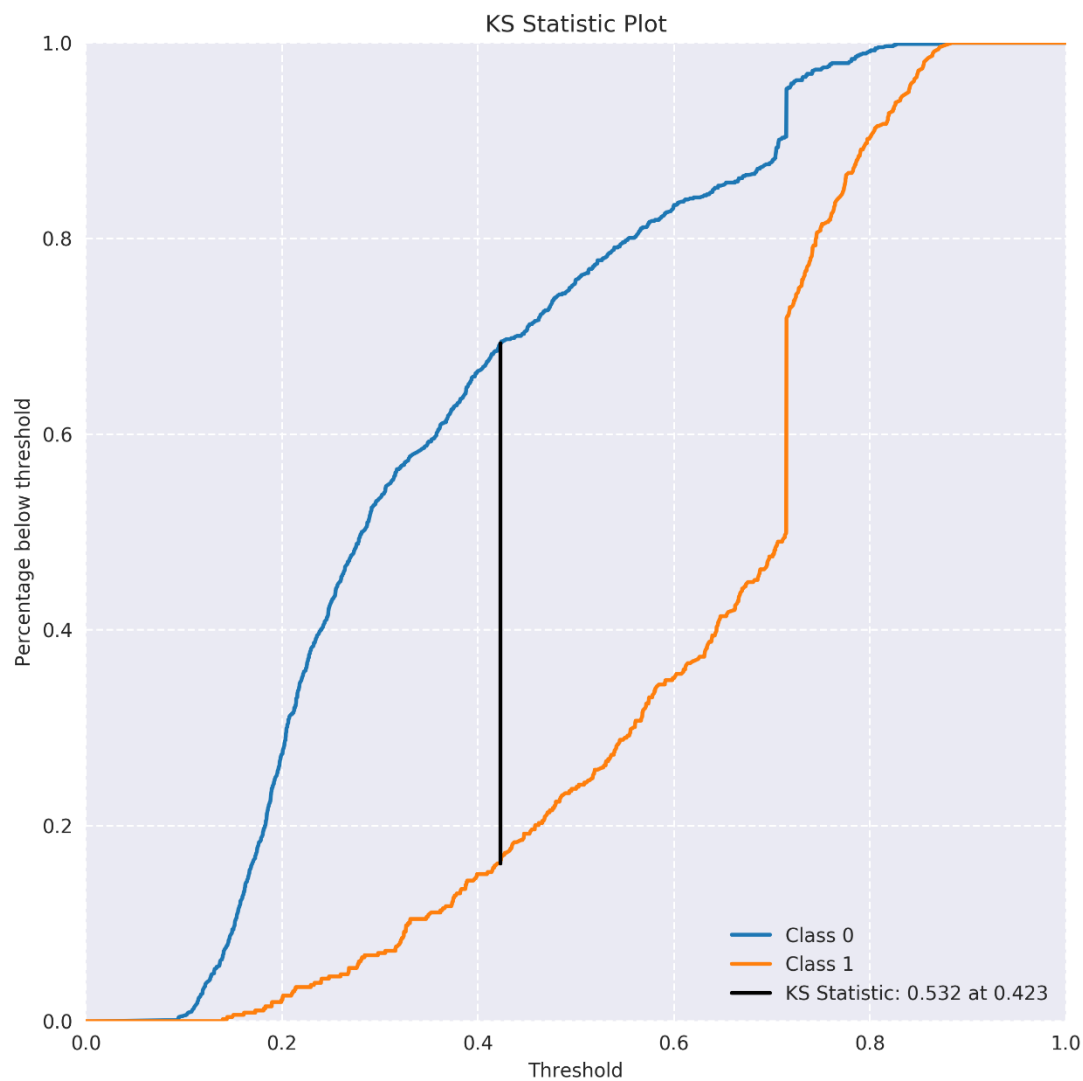

39 File name: **Figure S3. tif**

40 Title of data: The visual interface for prospective studies of the AKI early diagnosis prediction models.

41  
42  
43 Description of data: Different patients have independent card display information, in which the last line  
44  
45  
46  
47 of the card is the AKI diagnosis. The visual interface was not available to doctors during the prospective  
48  
49  
50 study and was used only by the researchers to verify the diagnosis and for sampling verification.

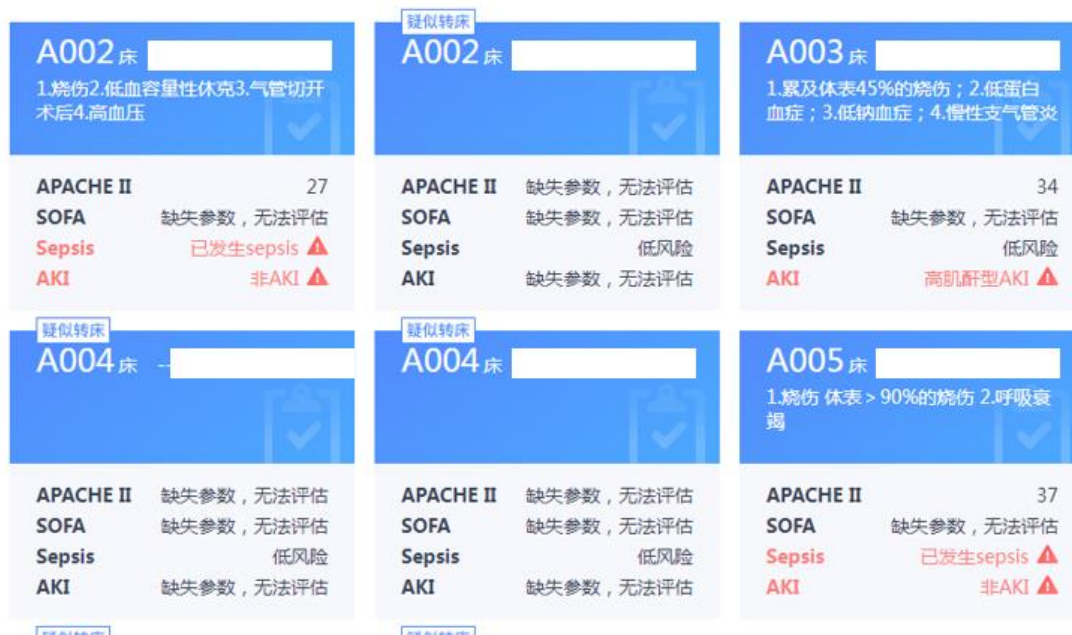

File name: **Table S1.docx**

Title and of Description data: Missing data between three databases in the study and values included in the model.

|                           | SHZJU-ICU | MIMIC | AmsterdamUMC | Including in Model |
|---------------------------|-----------|-------|--------------|--------------------|
| Age                       | √         | √     | √            | √                  |
| Gender                    | √         | √     | √            | √                  |
| Race                      | √         | √     | ×            | ×                  |
| Primary disease           | √         | √     | ×            | ×                  |
| Comorbidity               | √         | √     | ×            | ×                  |
| Ventilation               | √         | √     | √            | √                  |
| Operation                 | √         | √     | ×            | ×                  |
| ICU hours                 | √         | √     | √            | √                  |
| Survived                  | √         | √     | √            | √                  |
| <b>Vital sign</b>         |           |       |              |                    |
| Temperature               | √         | √     | √            | √                  |
| Systolic pressure         | √         | √     | √            | √                  |
| Diastolic pressure        | √         | √     | √            | √                  |
| Respiratory rate          | √         | √     | √            | √                  |
| Heart rate                | √         | √     | √            | √                  |
| Oxygen saturation         | √         | √     | √            | √                  |
| Urine                     | √         | √     | √            | √                  |
| GCS score                 | √         | ×     | ×            | ×                  |
| <b>Laboratory results</b> |           |       |              |                    |

|    |                         |   |   |   |
|----|-------------------------|---|---|---|
| 1  |                         |   |   |   |
| 2  |                         |   |   |   |
| 3  | <b>Scr</b>              | √ | √ | √ |
| 4  | <b>BUN</b>              | √ | √ | √ |
| 5  | <b>RBC</b>              | √ | √ | √ |
| 6  | <b>MCV</b>              | √ | √ | √ |
| 7  | <b>Hb</b>               | √ | √ | √ |
| 8  | <b>WBC</b>              | √ | √ | √ |
| 9  | <b>NEUT</b>             | √ | √ | √ |
| 10 | <b>PLT</b>              | √ | √ | √ |
| 11 | <b>HCV</b>              | √ | √ | × |
| 12 | <b>TBLB</b>             | √ | √ | √ |
| 13 | <b>DBLB</b>             | √ | √ | √ |
| 14 | <b>IBLB</b>             | √ | √ | √ |
| 15 | <b>CRP</b>              | √ | √ | √ |
| 16 | <b>PCT</b>              | √ | × | × |
| 17 | <b>Serum kalium</b>     | √ | √ | √ |
| 18 | <b>Serum natrium</b>    | √ | √ | √ |
| 19 | <b>Serum chlorine</b>   | √ | √ | √ |
| 20 | <b>PT</b>               | √ | √ | √ |
| 21 | <b>APTT</b>             | √ | √ | √ |
| 22 | <b>INR</b>              | √ | √ | √ |
| 23 | <b>CK</b>               | √ | √ | √ |
| 24 | <b>LDH</b>              | √ | √ | √ |
| 25 | <b>Troponin</b>         | √ | √ | √ |
| 26 | <b>Blood glucose</b>    | √ | √ | √ |
| 27 | <b>PH</b>               | √ | √ | √ |
| 28 | <b>Lactic acid</b>      | √ | √ | √ |
| 29 | <b>Anion gap</b>        | √ | √ | √ |
| 30 | <b>ABC</b>              | √ | √ | √ |
| 31 | <b>SBC</b>              | √ | √ | √ |
| 32 | <b>PaCO<sub>2</sub></b> | √ | √ | √ |
| 33 | <b>PaO<sub>2</sub></b>  | √ | √ | √ |
| 34 |                         |   |   |   |
| 35 |                         |   |   |   |
| 36 |                         |   |   |   |
| 37 |                         |   |   |   |
| 38 |                         |   |   |   |
| 39 |                         |   |   |   |
| 40 |                         |   |   |   |
| 41 |                         |   |   |   |
| 42 |                         |   |   |   |
| 43 |                         |   |   |   |
| 44 |                         |   |   |   |

SHZJU-ICU: The general ICU database of the second affiliated hospital of Zhejiang university school of medicine; MIMIC: Medical Information Mart for Intensive Care; APTT: Activated partial thromboplastin time; INR: International normalized ratio; LDH: Lactate dehydrogenase; PaCO<sub>2</sub>: Partial pressure of carbon dioxide; PaO<sub>2</sub> Partial pressure of oxygen; MCV: Mean corpuscular volume; PH: Potential of hydrogen; WBC: White blood cell count; NEUT: Proportion of neutrophils; CK: Creatine kinase; Scr: Serum Creatinine; BUN: Blood urea nitrogen; RBC: Red blood cell count; Hb: Hemoglobin; PT: Prothrombin time; TBLB: Total bilirubin; DBLB: Direct bilirubin; IBLB: Indirect bilirubin; CRP: C-reactive protein; HCV: Hematocrit value; PCT: Procalcitonin; ABC: Actual Bicarbonate Radical; SBC: Standard Bicarbonate Radical; PLT: Platelet count

File name: **Table S2.docx**

Title and of Description data: Clinical Demographics and Outcomes of SHZJU-ICU patients in model building set and prospective validation.

|                                         | SHZJU-ICU<br>Negative<br>(N=5695) | SHZJU-ICU<br>Severe AKI<br>(N=766) | P-value | SHZJU-ICU<br>Prospective<br>Negative<br>(N=2188) | SHZJU-ICU<br>Prospective<br>Positive<br>(N=344) | P-value |
|-----------------------------------------|-----------------------------------|------------------------------------|---------|--------------------------------------------------|-------------------------------------------------|---------|
| <b>Age, median [IQR]</b>                | 60.5<br>[48.8-70.1]               | 62.1<br>[50.1-72.5]                | 0.004   | 61.3<br>[47.5-73.4]                              | 62.1<br>[51.2-70.5]                             | 0.03    |
| <b>Gender, male (%)</b>                 | 3561 (64.9)                       | 438 (59.8)                         | 0.007   | 1365 (62.4)                                      | 207 (60.2)                                      | 0.438   |
| <b>Race</b>                             |                                   |                                    |         |                                                  |                                                 |         |
| <b>White</b>                            | 3 (0.05)                          | 1 (0.1)                            | 1       | 2 (0.001)                                        | 0                                               | 1       |
| <b>Black</b>                            | 1 (0.02)                          | 0                                  | 1       | 0                                                | 0                                               | 1       |
| <b>Asian</b>                            | 5691(99.9)                        | 764 (99.7)                         | 1       | 2185 (99.9)                                      | 344(100)                                        | 1       |
| <b>Other</b>                            | 0                                 | 1 (0.1)                            | 1       | 1 (0.001)                                        | 0                                               | 1       |
| <b>Admission Scr (mg/dL), mean (sd)</b> | 0.9 (0.34)                        | 1.0 (0.40)                         | <0.001  | 0.8 (0.32)                                       | 0.9 (0.35)                                      | <0.001  |
| <b>Admission BUN (mg/dL), mean (sd)</b> | 18 (11)                           | 21 (9)                             | <0.001  | 17 (11)                                          | 20 (10)                                         | 0.007   |
| <b>Cancer, n (%)</b>                    | 644 (11.3)                        | 48 (6.3)                           | <0.001  | 230 (10.5)                                       | 26 (7.6)                                        | 0.102   |
| <b>Cirrhosis, n (%)</b>                 | 43 (0.8)                          | 6 (0.8)                            | 0.89    | 15 (0.7)                                         | 3 (0.8)                                         | 0.726   |
| <b>Cardiopathy, n (%)</b>               | 231 (4.1)                         | 42 (5.5)                           | 0.08    | 98 (4.5)                                         | 19 (5.7)                                        | 0.403   |
| <b>Diabetes, n (%)</b>                  | 305 (5.4)                         | 63 (8.2)                           | 0.002   | 142 (6.5)                                        | 29 (8.6)                                        | 0.203   |
| <b>Hypertension, n (%)</b>              | 889 (15.6)                        | 115 (15.0)                         | 0.70    | 324(14.8)                                        | 56 (16.4)                                       | 0.466   |
| <b>Ventilation, n (%)</b>               | 2569 (45.1)                       | 592 (77.3)                         | <0.001  | 1102 (50.4)                                      | 239 (69.5)                                      | <0.001  |
| <b>Operation, n (%)</b>                 | 3361 (59.1)                       | 373 (48.7)                         | <0.001  | 1234(56.4)                                       | 160 (46.7)                                      | 0.001   |
| <b>ICU Hours, median [IQR]</b>          | 50.8<br>[23.0-139.5]              | 164.4<br>[70.3-328.6]              | <0.001  | 58.7<br>[34.2-160.4]                             | 145.6<br>[68.5-314.8]                           | <0.001  |
| <b>Survived, n (%)</b>                  | 4997 (87.7)                       | 380 (49.6)                         | <0.001  | 1868 (85.4)                                      | 178 (51.9)                                      | <0.001  |

SHZJU-ICU: The general ICU database of the second affiliated hospital of Zhejiang university school of medicine; MIMIC: Medical Information Mart for Intensive Care; IQR: Inter-Quartile Range; ICU: Intensive Care Unit; AKI: Acute Kidney Injury. Scr: serum creatinine; BUN: blood urea nitrogen.

File name: **Table S3.docx**

Title of data: TRIPOD Checklist of Prediction Model Development and Validation

Description of data: Writing norms of this type of research.

| 1Section/Topic               |     | Checklist Item |                                                                                                                                                                                                  | Page            |
|------------------------------|-----|----------------|--------------------------------------------------------------------------------------------------------------------------------------------------------------------------------------------------|-----------------|
| <b>Title and abstract</b>    |     |                |                                                                                                                                                                                                  |                 |
| Title                        | 1   | D;V            | Identify the study as developing and/or validating a multivariable prediction model, the target population, and the outcome to be predicted.                                                     | Yes; P1         |
| Abstract                     | 2   | D;V            | Provide a summary of objectives, study design, setting, participants, sample size, predictors, outcome, statistical analysis, results, and conclusions.                                          | Yes; P2         |
| <b>Introduction</b>          |     |                |                                                                                                                                                                                                  |                 |
| Background and objectives    | 3a  | D;V            | Explain the medical context (including whether diagnostic or prognostic) and rationale for developing or validating the multivariable prediction model, including references to existing models. | Yes; P3         |
|                              | 3b  | D;V            | Specify the objectives, including whether the study describes the development or validation of the model or both.                                                                                | Yes; P4, L76-79 |
| <b>Methods</b>               |     |                |                                                                                                                                                                                                  |                 |
| Source of data               | 4a  | D;V            | Describe the study design or source of data (e.g., randomized trial, cohort, or registry data), separately for the development and validation data sets, if applicable.                          | Yes; P4, L80    |
|                              | 4b  | D;V            | Specify the key study dates, including start of accrual; end of accrual; and, if applicable, end of follow-up.                                                                                   | Yes; P4, L84-86 |
| Participants                 | 5a  | D;V            | Specify key elements of the study setting (e.g., primary care, secondary care, general population) including number and location of centres.                                                     | Yes             |
|                              | 5b  | D;V            | Describe eligibility criteria for participants.                                                                                                                                                  | Yes; P5, L104   |
|                              | 5c  | D;V            | Give details of treatments received, if relevant.                                                                                                                                                | NA              |
| Outcome                      | 6a  | D;V            | Clearly define the outcome that is predicted by the prediction model, including how and when assessed.                                                                                           | Yes; P6, L111   |
|                              | 6b  | D;V            | Report any actions to blind assessment of the outcome to be predicted.                                                                                                                           | NA              |
| Predictors                   | 7a  | D;V            | Clearly define all predictors used in developing or validating the multivariable prediction model, including how and when they were measured.                                                    | Yes; P6, L116   |
|                              | 7b  | D;V            | Report any actions to blind assessment of predictors for the outcome and other predictors.                                                                                                       | NA              |
| Sample size                  | 8   | D;V            | Explain how the study size was arrived at.                                                                                                                                                       | NA              |
| Missing data                 | 9   | D;V            | Describe how missing data were handled (e.g., complete-case analysis, single imputation, multiple imputation) with details of any imputation method.                                             | Yes; P6, L127   |
| Statistical analysis methods | 10a | D              | Describe how predictors were handled in the analyses.                                                                                                                                            | Yes; P6, L116   |
|                              | 10b | D              | Specify type of model, all model-building procedures (including any predictor selection), and method for internal validation.                                                                    | Yes; P6, L119   |
|                              | 10c | V              | For validation, describe how the predictions were calculated.                                                                                                                                    | Yes; P6, L126   |
|                              | 10d | D;V            | Specify all measures used to assess model performance and, if relevant, to compare multiple models.                                                                                              | Yes; P6, L159   |
|                              | 10e | V              | Describe any model updating (e.g., recalibration) arising from the validation, if done.                                                                                                          | NA              |
| Risk groups                  | 11  | D;V            | Provide details on how risk groups were created, if done.                                                                                                                                        | Yes; P6, L111   |

|                            |    |     |                                                                                                                                                                                                       |                   |
|----------------------------|----|-----|-------------------------------------------------------------------------------------------------------------------------------------------------------------------------------------------------------|-------------------|
| Development vs. validation | 12 | V   | For validation, identify any differences from the development data in setting, eligibility criteria, outcome, and predictors.                                                                         | Yes; P6, L132     |
| <b>Results</b>             |    |     |                                                                                                                                                                                                       |                   |
| Participants               | 3a | D;V | Describe the flow of participants through the study, including the number of participants with and without the outcome and, if applicable, a summary of the follow-up time. A diagram may be helpful. | Yes; Figure 1     |
|                            | 3b | D;V | Describe the characteristics of the participants (basic demographics, clinical features, available predictors), including the number of participants with missing data for predictors and outcome.    | Yes, P8, L168-180 |
|                            | 3c | V   | For validation, show a comparison with the development data of the distribution of important variables (demographics, predictors and outcome).                                                        | Yes, Table2       |
| Model development          | 4a | D   | Specify the number of participants and outcome events in each analysis.                                                                                                                               | Yes, P8, L168     |
|                            | 4b | D   | If done, report the unadjusted association between each candidate predictor and outcome.                                                                                                              | Yes               |
| Model specification        | 5a | D   | Present the full prediction model to allow predictions for individuals (i.e., all regression coefficients, and model intercept or baseline survival at a given time point).                           | Yes.              |
|                            | 5b | D   | Explain how to use the prediction model.                                                                                                                                                              | Yes, P9, L196     |
| Model performance          | 16 | D;V | Report performance measures (with CIs) for the prediction model.                                                                                                                                      | Yes, P9, L190     |
| Model-updating             | 17 | V   | If done, report the results from any model updating (i.e., model specification, model performance).                                                                                                   | NA                |
| <b>Discussion</b>          |    |     |                                                                                                                                                                                                       |                   |
| Limitations                | 18 | D;V | Discuss any limitations of the study (such as nonrepresentative sample, few events per predictor, missing data).                                                                                      | Yes, P12, L236    |
| Interpretation             | 9a | V   | For validation, discuss the results with reference to performance in the development data, and any other validation data.                                                                             | Yes, P11, L217    |
|                            | 9b | D;V | Give an overall interpretation of the results, considering objectives, limitations, results from similar studies, and other relevant evidence.                                                        | Yes, P10 L198     |
| Implications               | 20 | D;V | Discuss the potential clinical use of the model and implications for future research.                                                                                                                 | Yes, P9, L193     |
| <b>Other information</b>   |    |     |                                                                                                                                                                                                       |                   |
| Supplementary information  | 21 | D;V | Provide information about the availability of supplementary resources, such as study protocol, Web calculator, and data sets.                                                                         | Yes               |
| Funding                    | 22 | D;V | Give the source of funding and the role of the funders for the present study.                                                                                                                         | NA                |



# BMJ Open

## Prospective Validation for Severe Acute Kidney Injury Predicting Model based on transcontinental databases

|                                 |                                                                                                                                                                                                                                                                                                                                                                                                                                                              |
|---------------------------------|--------------------------------------------------------------------------------------------------------------------------------------------------------------------------------------------------------------------------------------------------------------------------------------------------------------------------------------------------------------------------------------------------------------------------------------------------------------|
| Journal:                        | <i>BMJ Open</i>                                                                                                                                                                                                                                                                                                                                                                                                                                              |
| Manuscript ID                   | bmjopen-2021-054092.R1                                                                                                                                                                                                                                                                                                                                                                                                                                       |
| Article Type:                   | Original research                                                                                                                                                                                                                                                                                                                                                                                                                                            |
| Date Submitted by the Author:   | 23-Sep-2021                                                                                                                                                                                                                                                                                                                                                                                                                                                  |
| Complete List of Authors:       | Liang, Qiqiang; Zhejiang University School of Medicine Second Affiliated Hospital<br>Xu, Yongfeng; HealSci Technology Co<br>Zhou, Yu; Zhejiang University School of Medicine Second Affiliated Hospital<br>Chen, Xinyi; Zhejiang University School of Medicine Second Affiliated Hospital<br>Chen, Juan; Zhejiang University School of Medicine Second Affiliated Hospital<br>Huang, Man; Zhejiang University School of Medicine Second Affiliated Hospital, |
| <b>Primary Subject Heading</b>: | Intensive care                                                                                                                                                                                                                                                                                                                                                                                                                                               |
| Secondary Subject Heading:      | Diagnostics                                                                                                                                                                                                                                                                                                                                                                                                                                                  |
| Keywords:                       | Acute renal failure < NEPHROLOGY, INTENSIVE & CRITICAL CARE, Information technology < BIOTECHNOLOGY & BIOINFORMATICS, Adult intensive & critical care < INTENSIVE & CRITICAL CARE                                                                                                                                                                                                                                                                            |
|                                 |                                                                                                                                                                                                                                                                                                                                                                                                                                                              |

SCHOLARONE™  
Manuscripts



I, the Submitting Author has the right to grant and does grant on behalf of all authors of the Work (as defined in the below author licence), an exclusive licence and/or a non-exclusive licence for contributions from authors who are: i) UK Crown employees; ii) where BMJ has agreed a CC-BY licence shall apply, and/or iii) in accordance with the terms applicable for US Federal Government officers or employees acting as part of their official duties; on a worldwide, perpetual, irrevocable, royalty-free basis to BMJ Publishing Group Ltd ("BMJ") its licensees and where the relevant Journal is co-owned by BMJ to the co-owners of the Journal, to publish the Work in this journal and any other BMJ products and to exploit all rights, as set out in our [licence](#).

The Submitting Author accepts and understands that any supply made under these terms is made by BMJ to the Submitting Author unless you are acting as an employee on behalf of your employer or a postgraduate student of an affiliated institution which is paying any applicable article publishing charge ("APC") for Open Access articles. Where the Submitting Author wishes to make the Work available on an Open Access basis (and intends to pay the relevant APC), the terms of reuse of such Open Access shall be governed by a Creative Commons licence – details of these licences and which [Creative Commons](#) licence will apply to this Work are set out in our licence referred to above.

Other than as permitted in any relevant BMJ Author's Self Archiving Policies, I confirm this Work has not been accepted for publication elsewhere, is not being considered for publication elsewhere and does not duplicate material already published. I confirm all authors consent to publication of this Work and authorise the granting of this licence.

1  
2  
3  
4 **1 Prospective Validation for Severe Acute Kidney Injury Predicting Model based**  
5  
6 **2 on transcontinental databases**  
7  
8

9 Qiqiang Liang<sup>1</sup>; Yongfeng Xu<sup>2</sup>; Yu Zhou<sup>1</sup>; Xinyi Chen<sup>1</sup>, MM; Juan Chen<sup>1</sup>; Man Huang<sup>1\*</sup>  
10

11 <sup>1</sup>General Intensive Care Unit, Second Affiliated Hospital of Zhejiang University School of Medicine, Hangzhou,  
12  
13  
14 China.  
15

16 <sup>2</sup>BSc, HealSci Technology Co., Ltd, Beijing China.  
17

18  
19 \*Corresponding author: Man Huang, MD PhD.  
20

21  
22 Department: General Intensive Care Unit  
23

24  
25 Hospital: Second Affiliated Hospital of Zhejiang University School of Medicine  
26

27  
28 Address: No. 1511, Jianghong Road, Bingjiang District, Hangzhou City, Zhejiang Province  
29

30  
31 Tel: + 86 571 89713427  
32

33  
34 Fax: + 86 571 89713427  
35

36  
37 E-mail: [huangman@zju.edu.cn](mailto:huangman@zju.edu.cn).  
38

39  
40 ORCID: 0000-0002-0842-2254  
41  
42  
43  
44  
45  
46  
47  
48  
49  
50  
51  
52  
53  
54  
55  
56  
57  
58  
59  
60

15

16

17

18

19

20

21

22

1  
2  
3  
4 **23 Abstract:**

5  
6 **24 Objectives:** There are many studies of acute kidney injury (AKI) diagnosis models lack of external  
7  
8  
9 **25 validation and prospective validation.** We constructed the models using three databases to predict severe  
10  
11 **26 AKI within 48 hours in intensive care unit (ICU) patients.**

12  
13  
14 **27 Design:** A retrospective and prospective cohort study.

15  
16  
17 **28 Setting:** We studied critically ill patients in our database (SHZJU-ICU) and two other public databases,  
18  
19 **29 the Medical Information Mart for Intensive Care (MIMIC) and AmsterdamUMC databases, including**  
20  
21 **30 basic demographics, vital signs, and laboratory results.** We predicted the diagnosis of severe AKI in  
22  
23 **31 patients in the next 48 hours using machine-learning algorithms with the three databases.** Then, we  
24  
25 **32 carried out real-time severe AKI prediction in the prospective validation study at our centre for one year.**

26  
27  
28 **33 Participants:** All patients included in three databases with uniform exclusion criteria.

29  
30  
31 **34 Primary and secondary outcome measures:** Effect evaluation index of prediction models.

32  
33  
34 **35 Results:** We included 58492 patients, and a total of 5257 (9.0%) patients met the definition of severe  
35  
36 **36 AKI.** In the internal validation of the SHZJU-ICU and MIMIC databases, the best area under the receiver  
37  
38 **37 operating characteristic curve (AUROC) of the model was 0.86.** The external validation results by  
39  
40 **38 AmsterdamUMC database were also satisfactory, with the best AUROC of 0.86.** A total of 2532 patients  
41  
42 **39 were admitted to the center for prospective validation; 358 positive results were predicted, and 344**  
43  
44 **40 patients were diagnosed with severe AKI, with the best sensitivity of 0.72, the specificity of 0.80, and**  
45  
46 **41 the AUROC of 0.84.**

47  
48  
49 **42 Conclusion:** The prediction model of severe AKI exhibits promises as a clinical application based on  
50  
51 **43 dynamic vital signs and laboratory results of multi-center databases with prospective and external**  
52  
53 **44 validation.**

1  
2  
3  
4 45 **Keywords:** Machine learning; Acute kidney injury; Real-time prospective validation; External  
5  
6 46 validation.

7  
8  
9 47 **Strengths and limitations of this study:**

10  
11 48 An important verification step from artificial intelligence research to clinical use;

12  
13 49 Three large database containing different national populations and regions;

14  
15 50 The prediction model with excellent performance in complete data validation;

16  
17 51 Differences in the samples proportion of three databases;

18  
19 52 The dimensions of variables are not rich enough.

20  
21 53

22  
23 54 **Introduction:**

24  
25 55 Acute kidney injury (AKI), as a common clinical complication in the intensive care unit (ICU),

26  
27 56 significantly increases the duration of hospitalization and mortality[1]. AKI is divided into three types

28  
29 57 according to the various aetiologies: prerenal (renal hypoperfusion), intrarenal (vascular, glomerular, or

30  
31 58 tubulointerstitial lesions), and postrenal (urinary tract obstruction)[2]. Although nearly all diseases

32  
33 59 associated with ICU admission may cause AKI, acute tubular necrosis (ATN) and prerenal azotaemia

34  
35 60 are the most common causes[3].

36  
37 61 All AKI diagnostic criteria including the latest Kidney Disease: Improving Global Outcomes (KDIGO)

38  
39 62 standard are currently based on the creatinine level and urine volume[4]. However, the increase in the

40  
41 63 creatinine level or decrease in the urine volume lags the onset of AKI[2]. Many studies have suggested

42  
43 64 that early diagnosis and treatment of reversible AKI can reduce mortality[5]. Therefore, the creatinine

44  
45 65 level and urine volume are not satisfactory to meet clinical diagnostic demands. Consequently, many

46  
47 66 researchers have tried to develop an early warning model by analysing the risk factors for AKI[6].

1  
2  
3  
4 67 Patient complications, such as diabetes, hypertension, cardiovascular disease, chronic liver disease,  
5  
6 68 sepsis, and trauma, are identified as important risk factors for AKI[7]. The AKI prediction model and  
7  
8  
9 69 scoring system developed based on high-risk factors has gradually become the focus of research  
10  
11  
12 70 considering the lower clinical application threshold compared with that of new biomarkers[6]. Although  
13  
14 71 most previous prediction models use the multiple logistic regression model, a variety of AKI prediction  
15  
16  
17 72 models based on machine learning have resulted in satisfactory outcomes[6]. Since the first AKI  
18  
19 73 prediction model study based on artificial intelligence was published in 2016, researchers have built more  
20  
21  
22 74 than 20 published AKI prediction models successively by using local or multi-centre databases[6,8-14].  
23  
24  
25 75 The results indicate that these models can predict the occurrence of AKI and the need for renal  
26  
27 76 replacement therapy (RRT) within 24 or 48 hours, with accuracies ranging from 81% to 97%[6,15]. In  
28  
29  
30 77 addition, many studies have focused on subspecialized conditions, including cardiac surgery, trauma,  
31  
32  
33 78 and burns[14-16]. However, the common defect in these studies is the lack of external validation and  
34  
35  
36 79 prospective validation, which causes the prediction model to deviate from the clinical scenarios and limits  
37  
38 80 extrapolation beyond the scope of the data.

39  
40 81 In this study, we built models to predict AKI within 48 hours in critically ill patients by using  
41  
42  
43 82 transcontinental three databases. Then, we evaluated the clinical effect of the model through a one-year  
44  
45  
46 83 prospective validation at our centre.

47  
48 84

## 49 50 85 **Methods :**

### 51 52 86 **Study design and setting**

53  
54  
55  
56 87 We collected patients using three ICU databases and prospectively validated the models in our centre.

57  
58 88 The first database was our centre general ICU database (SHZJU-ICU) of the Second Affiliated Hospital  
59  
60

1  
2  
3  
4 89 of Zhejiang University School of Medicine, an academic teaching hospital. Since its establishment in  
5  
6 90 2017, it has included 12000 ICU patients' data and is updated daily. The Medical Information Mart for  
7  
8  
9 91 Intensive Care (MIMIC) III database, the second one, is an open ICU database provided by the  
10  
11 92 Massachusetts Institute of Technology and includes nearly 60000 ICU patients from North America[17].  
12  
13  
14 93 Lastly, the AmsterdamUMC database is an available European ICU database with health data related to  
15  
16  
17 94 23000 patients admitted to ICUs in parts of Europe[18]. The research flow chart is shown in Figure 1.  
18  
19  
20 95

## 21 22 96 **Study definition**

23  
24 97 In this study, the diagnosis of AKI was confirmed based on three stages according to the KDIGO  
25  
26  
27 98 criteria[4]. We defined the patients who met the KDIGO AKI II and III criteria as severe AKI groups  
28  
29  
30 99 and the others as negative groups. We excluded patients with lack of creatinine measurements during  
31  
32  
33 100 admission, patients with creatinine baseline more than 3.0 mg/dL at admission, patients who met severe  
34  
35  
36 101 AKI diagnosis within 24 hours, and patients who used RRT within 48 hours after admission[19]. In  
37  
38 102 addition, we excluded pregnant women, patients younger than 14 years old, and patients hospitalized in  
39  
40  
41 103 the ICU for fewer than 48 hours. After the patient was admitted to ICU, we performed a prediction every  
42  
43  
44 104 24 hours and recorded a prediction time. If the patient was diagnosed with severe AKI within 48 hours,  
45  
46  
47 105 the predictive time was defined as a positive predictive point, and the others were defined as a negative  
48  
49  
50 106 point.

## 51 107 **Data Collection**

52  
53 108 The variables included demographic data, vital signs, basic and primary diseases, laboratory results,  
54  
55  
56 109 important operation records, and drug records. Comorbidity included hypertension, diabetes, cardiopathy,  
57  
58  
59 110 liver disease, and malignant tumors. The primary disease was the main cause of admission to the ICU  
60

1  
2  
3  
4 111 following the ICD-10 codes. The vital signs and clinical laboratory results were transformed into  
5  
6 112 different variables according to the average, variance, maximum, minimum, and final value before  
7  
8  
9 113 diagnosis. We use a method similar to the forward incremental method in the multivariate logic  
10  
11 114 regression model, that is, the combination of embedded feature selection and forward addition for feature  
12  
13  
14 115 selection. First of all, all variables are trained in the model, then list by variables importance. variables  
15  
16  
17 116 are added to the model one by one according to the variable importance. a variable is retained if it causes  
18  
19 117 the AUC growth to be greater than 0.01, otherwise delete it. We transformed the MIMIC and  
20  
21  
22 118 AmsterdamUMC databases according to our centre database structure, unifying the unit and diagnostic  
23  
24  
25 119 codes. We deleted variables missing more than 50%. Variables missing more than 30% but less than 50%  
26  
27 120 are listed to clinicians who determine the potential correlation between these variables and AKI. We  
28  
29  
30 121 carry out multiple interpolation for these variables which clinicians require to be retained, and the others  
31  
32 122 deleted. Variables missing less than 30% are fill in multiple interpolation. All Missing data between three  
33  
34  
35 123 databases and values included in the model shown in supplementation file Table S1.

#### 37 124 **Model construction and external validation**

39  
40 125 The ratio of the training and internal validation sets was 4:1. The SHZJU and MIMIC databases  
41  
42 126 training sets were mixed into a new training set. There were more negative data than positive data, so we  
43  
44  
45 127 randomly sampled the negative datasets and constructed a new data subset with a sampling ratio of  
46  
47  
48 128 positive and negative data of 1:5. We used multiple logistic regression, random forest, XGBoost,  
49  
50  
51 129 AdaBoost, LightGBoost, gradient boosting decision tree (GBDT), and debug to assess the variables and  
52  
53 130 model-related parameters by the fivefold cross-validation method. After the models were built, we used  
54  
55  
56 131 the SHZJU-ICU and MIMIC test sets for internal validation of the model and the AmsterdamUMC  
57  
58 132 database for external validation. The most appropriate cut-off value was determined according to the K-S  
59  
60



1  
2  
3  
4 133 curve. The prediction model represents the results of each prediction with a probability between 0 to 1.0.  
5  
6 134 We define results more than 0.4 as high-risk, that is, positive results, and the rest as negative results.  
7  
8  
9 135 Through internal validation and external validation, we calibrated the model by adjusting the super-  
10  
11 136 parameters and using the Platt calibration algorithm and compared the calibration effect by drawing a  
12  
13 137 reliability diagram. The model was visualized and analyzed by a visual programming scheme. All model  
14  
15 138 building and validation processes were performed in Python 3.6.

### 19 139 **Prospective validation**

20  
21  
22 140 The prospective research period was 2020.01.01 to 2020.12.31. We collected real-time data when  
23  
24 141 patients were admitted to the ICU, transformed the data according to the requirements, and formed a  
25  
26 142 complete sample for the prediction model after passing the integrity test. We had established a  
27  
28 143 visualization scheme and allowed researchers to review the predictions daily. The daily prediction results  
29  
30 144 were not publicly accessible during the study to avoid affecting clinicians' decisions, but the diagnosis  
31  
32 145 results were available to the researchers as visual graphics. We sampled the 20% predicted data every  
33  
34 146 month and deleted samples with more than 50% missing values to ensure data correctness. When a patient  
35  
36 147 has the following conditions, AKI prediction system will end the patient's prospective prediction: A. a  
37  
38 148 positive diagnosis; B. Transfer out of ICU or death with negative diagnosis. All diagnosis of severe AKI  
39  
40 149 needs to be reviewed by two ICU attending physicians independently, and if the they have different  
41  
42 150 opinion, the third one will be appealed.

### 50 151 **Patient and Public Involvement:**

51  
52  
53 152 The information of cases in three databases was in a state of complete desensitization in the process  
54  
55 153 of building the model. During the prospective study, all the patients signed an informed consent form at  
56  
57 154 the beginning of admission to ICU. The real-time data discussed and used by the study members only,  
58  
59  
60

1  
2  
3  
4 155 and were not made public during the study period. The study was evaluated and approved by the Ethics  
5  
6 156 Committee of the Second Affiliated Hospital of Zhejiang University School of Medicine as study number  
7  
8  
9 157 2019-078. All data were anonymized before the authors accessed them for the purpose of this study.  
10  
11 158 According to the inclusion criteria and exclusion criteria, we selected 58492 patients from three databases  
12  
13  
14 159 who met the requirements of the study, including 6461 patients from the SHZJU-ICU database, 36690  
15  
16  
17 160 patients from the MIMIC database, and 15341 patients from the AmsterdamUMC database.

### 161 **Statistical analysis:**

162 The population characteristics were reported as the medians and inter-quartile ranges (IQRs) for  
163 skewed data and the means and standard deviations for normally distributed data. The independent  
164 sample T-test was used for normally distributed data, and the rank-sum test was used for the rest.  
165 Dichotomous variables were assessed by the chi-square test, and a P value less than 0.05 was considered  
166 statistically significant. The non-normally distributed data were analyzed by exponential transformation  
167 and logarithmic transformation. The effect of the model was evaluated by parameters such as the  
168 AUROC, accuracy, specificity, and F1-score.

### 170 **Results:**

171 A total of 5257 (9.0%) patients met the definition of severe AKI (11.8% in SHZJU-ICU, 7.6% in  
172 MIMIC, and 10.9% in AmsterdamUMC). The distributions of age and sex in the three centers were  
173 similar, but the differences in race were large. Asian patients accounted for more than 99% in the SHZJU-  
174 ICU database, and only approximately 2.5% in the MIMIC database. White people accounted for more  
175 than 70% of the MIMIC database. In addition, patients from the MIMIC database had a higher incidence  
176 of the tumor, liver cirrhosis, diabetes, and hypertension. Patients in the AmsterdamUMC and SHZJU-

177 ICU databases had a higher proportion of mechanical ventilation and overall survival rate. Severe AKI  
 178 patients had longer ICU hospital stays and higher mortality. More details are presented in Table 1.  
 179 Table 1: Clinical Demographics and Outcomes in patients with or without severe acute  
 180 kidney injury.

|                                  | SHZJU-ICU<br>Negative<br>(N=5695) | SHZJU-ICU<br>Severe AKI<br>(N=766) | P-<br>valu<br>e | MIMIC<br>Negative<br>(N=33879) | MIMIC<br>Severe AKI<br>(N=2811) | P-<br>value | AmsterdamUMC<br>Negative<br>(N=13661) | AmsterdamUMC<br>severe AKI<br>(N=1680) | P-<br>value |
|----------------------------------|-----------------------------------|------------------------------------|-----------------|--------------------------------|---------------------------------|-------------|---------------------------------------|----------------------------------------|-------------|
| Age, median [IQR]                | 60.5<br>[48.8-70.1]               | 62.1<br>[50.1-72.5]                | 0.00<br>4       | 62.0<br>[45.0-76.0]            | 64.0<br>[52.0-76.0]             | <0.001      | 64.5<br>[54.5,74.5]                   | 64.3<br>[52.5,78.5]                    | 0.04        |
| Gender, male (%)                 | 3561 (64.9)                       | 438 (59.8)                         | 0.00<br>7       | 18976 (56.0)                   | 1524 (54.2)                     | 0.06        | 8920 (65.3)                           | 1054 (63.9)                            | 0.03        |
| Race                             |                                   |                                    |                 |                                |                                 |             | /                                     | /                                      | /           |
| White                            | 3 (0.05)                          | 1 (0.1)                            | 1               | 23796 (70.2)                   | 2005 (71.3)                     | 0.23        | /                                     | /                                      | /           |
| Black                            | 1 (0.02)                          | 0                                  | 1               | 2455 (7.2)                     | 199 (7.1)                       | 0.45        | /                                     | /                                      | /           |
| Asian                            | 5691(99.9)                        | 764 (99.7)                         | 1               | 918 (2.7)                      | 70 (2.5)                        | 0.54        | /                                     | /                                      | /           |
| Other                            | 0                                 | 1 (0.1)                            | 1               | 6710 (19.8)                    | 537 (19.1)                      | 0.34        | /                                     | /                                      | /           |
| Admission Scr (mg/dL), mean (sd) | 0.9 (0.34)                        | 1.0 (0.40)                         | <0.0<br>01      | 1.1 (0.41)                     | 1.1 (0.50)                      | 0.04        | 1.2 (0.35)                            | 1.1 (0.38)                             | <0.00<br>1  |
| Admission BUN (mg/dL), mean (sd) | 18 (11)                           | 21 (9)                             | <0.0<br>01      | 17 (12)                        | 23 (12)                         | <0.001      | 18 (13)                               | 23 (10)                                | <0.00<br>1  |
| Cancer, n (%)                    | 644 (11.3)                        | 48 (6.3)                           | <0.0<br>01      | 6652 (19.6)                    | 752 (26.8)                      | <0.001      | /                                     | /                                      | /           |
| Cirrhosis, n (%)                 | 43 (0.8)                          | 6 (0.8)                            | 0.89            | 1180 (3.5)                     | 426 (15.2)                      | <0.001      | /                                     | /                                      | /           |
| Cardiopathy, n (%)               | 231 (4.1)                         | 42 (5.5)                           | 0.08            | 4840 (14.3)                    | 336 (12.0)                      | 0.001       | /                                     | /                                      | /           |
| Diabetes, n (%)                  | 305 (5.4)                         | 63 (8.2)                           | 0.00<br>2       | 7250 (21.4)                    | 789 (28.1)                      | <0.001      | /                                     | /                                      | /           |
| Hypertension, n (%)              | 889 (15.6)                        | 115 (15.0)                         | 0.70            | 16328 (48.2)                   | 1513 (53.8)                     | <0.001      | /                                     | /                                      | /           |
| Ventilation, n (%)               | 2569 (45.1)                       | 592 (77.3)                         | <0.0<br>01      | 13009 (38.4)                   | 1503(53.5)                      | <0.001      | 7718(56.5)                            | 1248(74.3)                             | <0.00<br>1  |
| Operation, n (%)                 | 3361 (59.1)                       | 373 (48.7)                         | <0.0<br>01      | 12455 (36.7)                   | 1430 (50.8)                     | <0.001      | /                                     | /                                      | /           |
| ICU Hours, median [IQR]          | 50.8<br>[23.0-139.5]              | 164.4<br>[70.3-328.6]              | <0.0<br>01      | 51.0<br>[28.5-110.3]           | 103.4<br>[50.1-261.3]           | <0.001      | 24.0<br>[19.8,63.5]                   | 142.0<br>[45.4,394.2]                  | <0.00<br>1  |
| Survived, n (%)                  | 4997 (87.7)                       | 380 (49.6)                         | <0.0<br>01      | 25648 (75.7)                   | 1356 (48.2)                     | <0.001      | 10942(80.1)                           | 1033 (61.5)                            | <0.00<br>1  |

181 SHZJU-ICU: The general ICU database of the second affiliated hospital of Zhejiang university  
 182 school of medicine; MIMIC: Medical Information Mart for Intensive Care; IQR: Inter-Quartile

183 Range; *ICU*: Intensive Care Unit; *AKI*: Acute Kidney Injury. *Scr*: serum creatinine; *BUN*: blood  
 184 urea nitrogen.

185 There were significant differences in the important parameters of the variables among the different  
 186 models (see Figure S1). However, the trend of the creatinine level in the past week was still an important  
 187 variable, followed by urine volume, blood urea nitrogen level, temperature, and length of ICU stay. The  
 188 cut-off value used to distinguish between a negative and positive prediction was determined by the K-S  
 189 curve, with value of 0.423 (see Figure S2). The GBDT model had the best prediction effect in the test  
 190 set, followed by XGBoost and LightGBoost. In the two central internal validation sets, the two best-  
 191 performing machine learning algorithms with great AUROC are LightGBoost (SHZJU-ICU of 83.2%,  
 192 MIMIC of 86.0%) and XGBoost (SHZJU-ICU 85.9%, MIMIC 85.6%), as detailed in Figure 2. Overall,  
 193 the sensitivity (SHZJU-ICU 0.84, MIMIC 0.83) and the negative predictive value (SHZJU-ICU 0.90,  
 194 MIMIC 0.90) of the predictive model were high, but the specificity was general (SHZJU-ICU 0.79,  
 195 MIMIC 0.75), as shown in Table 2. In the external validation based on AmsterdamUMC database, the  
 196 overall model validation effect results were satisfactory, and XGBoost had the best performance, with  
 197 an AUROC of 0.84, as shown in Figure 2 and Table 2. We built a visual prediction interface based on  
 198 the prediction model (supplementation file Figure S3).

200 Table 2: Model validation results by three databases with machine learning algorithm

| Model                                              | AUROC        | Accuracy | Sensitivity | Specificity<br>Specificity | PPV   | NPV   | F1    |
|----------------------------------------------------|--------------|----------|-------------|----------------------------|-------|-------|-------|
| <b>Internal validation with SHZJU-ICU database</b> |              |          |             |                            |       |       |       |
| <b>Logistic regression</b>                         | 0.748        | 0.662    | 0.834       | 0.576                      | 0.496 | 0.874 | 0.622 |
| <b>LightGBoost</b>                                 | 0.832        | 0.741    | 0.839       | 0.692                      | 0.576 | 0.896 | 0.683 |
| <b>GBDT</b>                                        | 0.845        | 0.765    | 0.843       | 0.725                      | 0.606 | 0.902 | 0.705 |
| <b>AdaBoost</b>                                    | 0.806        | 0.721    | 0.824       | 0.67                       | 0.555 | 0.884 | 0.663 |
| <b>Random Forest</b>                               | 0.821        | 0.763    | 0.71        | 0.789                      | 0.627 | 0.845 | 0.666 |
| <b>XGBoost</b>                                     | <b>0.859</b> | 0.779    | 0.81        | 0.763                      | 0.631 | 0.889 | 0.709 |
| <b>Internal validation with MIMIC database</b>     |              |          |             |                            |       |       |       |

|                                                       |              |       |       |       |       |       |       |
|-------------------------------------------------------|--------------|-------|-------|-------|-------|-------|-------|
| <b>Logistic regression</b>                            | 0.733        | 0.695 | 0.643 | 0.72  | 0.535 | 0.801 | 0.584 |
| <b>LightGBost</b>                                     | <b>0.86</b>  | 0.768 | 0.822 | 0.741 | 0.613 | 0.893 | 0.702 |
| <b>GBDT</b>                                           | 0.846        | 0.765 | 0.786 | 0.755 | 0.616 | 0.876 | 0.691 |
| <b>AdaBoost</b>                                       | 0.837        | 0.732 | 0.831 | 0.683 | 0.567 | 0.89  | 0.674 |
| <b>Random Forest</b>                                  | 0.832        | 0.738 | 0.791 | 0.712 | 0.578 | 0.872 | 0.668 |
| <b>XGBoost</b>                                        | 0.856        | 0.758 | 0.833 | 0.721 | 0.598 | 0.895 | 0.695 |
| <b>External validation with AmsterdamUMC database</b> |              |       |       |       |       |       |       |
| <b>Logistic regression</b>                            | 0.704        | 0.767 | 0.516 | 0.893 | 0.706 | 0.787 | 0.596 |
| <b>LightGBost</b>                                     | 0.859        | 0.763 | 0.827 | 0.731 | 0.606 | 0.894 | 0.7   |
| <b>GBDT</b>                                           | 0.861        | 0.764 | 0.84  | 0.727 | 0.606 | 0.901 | 0.704 |
| <b>AdaBoost</b>                                       | 0.85         | 0.755 | 0.813 | 0.726 | 0.597 | 0.886 | 0.689 |
| <b>Random Forest</b>                                  | 0.82         | 0.743 | 0.77  | 0.729 | 0.587 | 0.864 | 0.666 |
| <b>XGBoost</b>                                        | <b>0.865</b> | 0.75  | 0.873 | 0.688 | 0.584 | 0.916 | 0.7   |
| <b>Prospective validation with SHZJU-ICU</b>          |              |       |       |       |       |       |       |
| <b>Logistic regression</b>                            | 0.758        | 0.772 | 0.648 | 0.834 | 0.662 | 0.826 | 0.655 |
| <b>LightGBost</b>                                     | 0.819        | 0.796 | 0.596 | 0.895 | 0.74  | 0.816 | 0.66  |
| <b>GBDT</b>                                           | 0.827        | 0.781 | 0.706 | 0.818 | 0.66  | 0.848 | 0.683 |
| <b>AdaBoost</b>                                       | 0.808        | 0.766 | 0.686 | 0.805 | 0.638 | 0.837 | 0.661 |
| <b>Random Forest</b>                                  | 0.804        | 0.755 | 0.715 | 0.775 | 0.613 | 0.845 | 0.66  |
| <b>XGBoost</b>                                        | <b>0.841</b> | 0.779 | 0.724 | 0.807 | 0.652 | 0.854 | 0.686 |

201 AUROC: Area Under Receiver Operating Characteristic; PPV: Positive Predictive Value; NPV:  
 202 Negative Predictive Value; SHZJU-ICU: The general ICU database of the second affiliated  
 203 hospital of Zhejiang university school of medicine; MIMIC: Medical Information Mart for  
 204 Intensive Care; GBDT: Gradient Boosted Decision Tree.

205

206 According to the inclusion and exclusion criteria, we delete 267 patients among 94 patients with  
 207 creatinine baseline more than 3.0 mg/dL at admission, 39 patients met severe AKI diagnosis within 24  
 208 hours, and 26 patients who used RRT within 48 hours after admission, 108 patients hospitalized in the  
 209 ICU for fewer than 48 hours. A total of 2532 patients were admitted to our centre for prospective  
 210 validation, and the prediction model made 16858 times predictions. In the prospective cohort, there was  
 211 no significant difference in age, gender, baseline creatinine and urea nitrogen, and complications. The  
 212 proportion of mechanical ventilation and the ICU stay time in AKI patients were longer with higher  
 213 mortality. Above all, there was no significant difference between the prospective and the retrospective  
 214 cohort. More detail sees in supplementation file Table S2. In the end, 358 positive results were predicted,

1  
2  
3  
4 215 and the rest were negative results. There are 344 patients with severe AKI were diagnosed and the  
5  
6 216 prediction accuracy was 83.5%. The model with the highest area under the curve was XGBoost, 0.84  
7  
8  
9 217 with the best sensitivity of 0.72, the specificity of 0.80. The results of the prospective study are similar  
10  
11 218 to those of the external validation of the model, and are relatively stable. More detail is presented in  
12  
13  
14 219 Figure 3 and Table 2.  
15  
16  
17 220

## 221 **Discussion:**

222 In this study, we built predictive models by machine learning to predict the incidence of severe AKI  
223 with three databases in different regions and in the next 48 hours. After internal and external validation,  
224 prospective validation over one year was carried out to verify the model effects. The three databases  
225 come from three countries that are in Asia, Europe, and North America, which proves that the model is  
226 universal to some extent.

227 Despite the huge amount of data, many databases are still not suitable for prospective research  
228 because they are not updated promptly. Tomasev, N and colleagues have provided research on AKI  
229 prediction models with a large amount of data[10]. The study covered 703782 adult patients with 6 billion  
230 individual items, including 620000 elements. In this study, a depth neural network model was used for  
231 real-time prediction. A total of 55.8% of severe AKI patients were predicted within the first 48 hours,  
232 although each accurate prediction was accompanied by two mispredictions[10]. This study provided a  
233 new scheme for real-time prediction and indicated that we should prospectively evaluate and  
234 independently validate models to explore their effectiveness. In a prospective study, Flechet, M et al  
235 compared an AKI prediction model with clinicians in 252 patients and found that the clinical effect of  
236 the random forest model for predicting AKI-II/III was equivalent to that of clinicians. Our prediction

1  
2  
3  
4 237 model graphical visualization of the model was installed in the centre's database for better usage. In  
5  
6 238 addition, our database is updated daily to achieve daily predictions and present the results to researchers.  
7  
8  
9 239 In the prospective validation of our study, the stability of the prediction model confirmed its promise,  
10  
11 240 which provides a basis for future research.

12  
13  
14 241 There are many studies of artificial intelligence for predicting the occurrence of AKI, but most of them  
15  
16 242 are single-centre studies, and the extrapolation effect has been controversial. In 2016, Koyner, J, and his  
17  
18 243 colleague published the first study of an AKI prediction model based on multi-centre data. In all 202961  
19  
20 244 patients, 17541 (8.6%) had AKI, 4251 (3.5%) had AKI-II, and 1242 (0.6%) had AKI-III. A multivariate  
21  
22 245 logistic regression model was used to predict AKI in this study with an AUROC of 0.74 (95% CI=0.74).  
23  
24 246 With the classification of AKI, the AUROC of the prediction model gradually increased to 0.84[8].  
25  
26 247 Subsequently, the study team used a new machine learning algorithm, to build a more accurate model to  
27  
28 248 predict the occurrence of AKI-II, with an AUROC of 0.9 within 24 hours and 0.87 within 48 hours[19].  
29  
30 249 Recently, the research team included data from two other centres, namely, LUMC (N=200613) and NUS  
31  
32 250 (N=246895), to externally validate the AKI-II prediction model with AUROCs reaching 0.85 to 0.86,  
33  
34 251 suggesting that the artificial intelligence model has stable predictive ability[12]. This series of studies  
35  
36 252 included many data points, suggesting the feasibility of artificial intelligence in the diagnosis of AKI,  
37  
38 253 but the proportion of positive patients (3.5%) and ICU patients (30%) was too low to properly predict  
39  
40 254 AKI. Our research is similar to the above. The SAHZJU-ICU database is a single-centre database  
41  
42 255 representing south-eastern China, and the MIMIC database is a well-known open ICU database in the  
43  
44 256 United States. The AmsterdamUMC database is a public database located in Europe. The population  
45  
46 257 structure and diseases in the three databases are complete but different in the distribution of complications  
47  
48 258 and race. Therefore, it provides a prediction model with unparalleled stability compared with other  
49  
50  
51  
52  
53  
54  
55  
56  
57  
58  
59  
60

1  
2  
3  
4 259 studies.

5  
6 260

7  
8  
9 261 Limitations:

10  
11 262 This retrospective multi-centre study was unable to carry out more clinical feature mining and

12  
13  
14 263 comparison because of different data structures. The differences between the three databases partly

15  
16  
17 264 reflect some demographic differences between Europe, the United States and China, resulting in a decline

18  
19  
20 265 in the accuracy of the prediction model. There are some differences in the number of patients included

21  
22 266 in the three databases, which may affect the choice of variables. As a result of the study design, we

23  
24  
25 267 deleted patients with ICU hospitalization of less than 48 hours, which may result in the exclusion of most

26  
27 268 relatively mild patients and may reduce false positives. Second, in the prospective data study in 2020,

28  
29  
30 269 there may be deviations in the inclusion of patients in the centre, thus affecting the interpretation of the

31  
32  
33 270 follow-up prospective results. Finally, given the low incidence of severe AKI and the great difference in

34  
35 271 the proportion of positive and negative samples, the data may be accidental. The diagnostic performance

36  
37  
38 272 of severe AKI is good with the sensitivity as high as 0.85 in model construction and external validation.

39  
40  
41 273 however, the sensitivity decreases to 0.72 in the prospective validation, and the overall PPV effect is

42  
43 274 general. Our model seems to be superior to diagnostic non-AKI patients rather than AKI because of the

44  
45  
46 275 proportion of positive data that we include. A large number of negative data will increase the specificity

47  
48 276 and reduce the sensitivity. In the retrospective study, we reduced the proportion of negative data by

49  
50  
51 277 randomization but retain all data in prospective phase with the sensitivity decreases. We believe that such

52  
53  
54 278 results are still acceptable and need to be viewed by the reader as a whole.

55  
56 279

57  
58 280 **Conclusion:**



1  
2  
3  
4 281 Based on databases of patients of different races from different countries, we constructed stable  
5  
6 282 machine learning models to predict the occurrence of AKI in the next 48 hours. Prospective validation  
7  
8  
9 283 through the implementation of an updated local database is an effective exploration of further research.  
10

11 284

12  
13  
14 285 Data Availability Statement:

15  
16  
17 286 The model code can be obtained by email if readers need it, but we cannot guarantee that all the  
18  
19 287 code will be provided. Two public databases can be applied from the official website of their respective  
20  
21  
22 288 databases.

23  
24  
25 289 Ethics approval:

26  
27 290 Our research was approved by the ethics committee of the Second Affiliated Hospital of Zhejiang  
28  
29  
30 291 University School of Medicine.

31  
32 292 Competing interests for authors:

33  
34  
35 293 The authors declare that they have no competing interests.  
36  
37  
38 294

39  
40 295 **Reference:**

- 41  
42  
43 296 1. Ronco, C.; Bellomo, R.; Kellum, J.A. Acute kidney injury. *The Lancet* **2019**, *394*, 1949-  
44  
45 297 1964, doi:10.1016/s0140-6736(19)32563-2.  
46  
47  
48 298 2. Pakula, A.M.; Skinner, R.A. Acute Kidney Injury in the Critically Ill Patient: A Current  
49  
50 299 Review of the Literature. *J Intensive Care Med* **2016**, *31*, 319-324,  
51  
52 300 doi:10.1177/0885066615575699.  
53  
54  
55 301 3. Bellomo, R.; Kellum, J.A.; Ronco, C. Acute kidney injury. *The Lancet* **2012**, *380*, 756-  
56  
57 302 766, doi:10.1016/s0140-6736(11)61454-2.  
58  
59  
60

- 1  
2  
3  
4 303 4. Khwaja, A. KDIGO clinical practice guidelines for acute kidney injury. *Nephron Clin*  
5  
6 304 *Pract* **2012**, *120*, c179-184, doi:10.1159/000339789.
- 7  
8  
9 305 5. Coelho, S.; Cabral, G.; Lopes, J.A.; Jacinto, A. Renal regeneration after acute kidney  
10  
11 306 injury. *Nephrology (Carlton)* **2018**, *23*, 805-814, doi:10.1111/nep.13256.
- 12  
13  
14 307 6. Wilson, F.P.; Greenberg, J.H. Acute Kidney Injury in Real Time: Prediction, Alerts, and  
15  
16 308 Clinical Decision Support. *Nephron* **2018**, *140*, 116-119, doi:10.1159/000492064.
- 17  
18  
19 309 7. Wu, Y.; Hao, W.; Chen, Y.; Chen, S.; Liu, W.; Yu, F.; Hu, W.; Liang, X. Clinical features,  
20  
21 310 risk factors, and clinical burden of acute kidney injury in older adults. *Ren Fail* **2020**,  
22  
23 311 *42*, 1127-1134, doi:10.1080/0886022X.2020.1843491.
- 24  
25  
26 312 8. Koyner, J.L.; Adhikari, R.; Edelson, D.P.; Churpek, M.M. Development of a Multicenter  
27  
28 313 Ward-Based AKI Prediction Model. *Clin J Am Soc Nephrol* **2016**, *11*, 1935-1943,  
29  
30 314 doi:10.2215/CJN.00280116.
- 31  
32  
33 315 9. Low, S.; Vathsala, A.; Murali, T.M.; Pang, L.; MacLaren, G.; Ng, W.Y.; Haroon, S.;  
34  
35 316 Mukhopadhyay, A.; Lim, S.L.; Tan, B.H., et al. Electronic health records accurately  
36  
37 317 predict renal replacement therapy in acute kidney injury. *BMC Nephrol* **2019**, *20*, 32,  
38  
39 318 doi:10.1186/s12882-019-1206-4.
- 40  
41  
42 319 10. Tomasev, N.; Glorot, X.; Rae, J.W.; Zielinski, M.; Askham, H.; Saraiva, A.; Mottram, A.;  
43  
44 320 Meyer, C.; Ravuri, S.; Protsyuk, I., et al. A clinically applicable approach to continuous  
45  
46 321 prediction of future acute kidney injury. *Nature* **2019**, *572*, 116-119,  
47  
48 322 doi:10.1038/s41586-019-1390-1.
- 49  
50  
51 323 11. Flechet, M.; Falini, S.; Bonetti, C.; Güiza, F.; Schetz, M.; Van den Berghe, G.; Meyfroidt,  
52  
53 324 G. Machine learning versus physicians' prediction of acute kidney injury in critically ill  
54  
55  
56  
57  
58  
59  
60

- 1  
2  
3  
4 325 adults: a prospective evaluation of the AKIpredictor. *Critical Care* **2019**, *23*, 282,  
5  
6 326 doi:10.1186/s13054-019-2563-x.  
7  
8  
9 327 12. Churpek, M.M.; Carey, K.A.; Edelson, D.P.; Singh, T.; Astor, B.C.; Gilbert, E.R.;  
10  
11 328 Winslow, C.; Shah, N.; Afshar, M.; Koyner, J.L. Internal and External Validation of a  
12  
13 329 Machine Learning Risk Score for Acute Kidney Injury. *JAMA Netw Open* **2020**, *3*,  
14  
15 330 e2012892, doi:10.1001/jamanetworkopen.2020.12892.  
16  
17  
18  
19 331 13. Yuan, Q.; Zhang, H.; Deng, T.; Tang, S.; Yuan, X.; Tang, W.; Xie, Y.; Ge, H.; Wang,  
20  
21 332 X.; Zhou, Q., et al. Role of Artificial Intelligence in Kidney Disease. *Int J Med Sci* **2020**,  
22  
23 333 *17*, 970-984, doi:10.7150/ijms.42078.  
24  
25  
26  
27 334 14. Li, Y.; Xu, J.; Wang, Y.; Zhang, Y.; Jiang, W.; Shen, B.; Ding, X. A novel machine  
28  
29 335 learning algorithm, Bayesian networks model, to predict the high-risk patients with  
30  
31 336 cardiac surgery-associated acute kidney injury. *Clin Cardiol* **2020**, *43*, 752-761,  
32  
33 337 doi:10.1002/clc.23377.  
34  
35  
36  
37 338 15. De Vlieger, G.; Kashani, K.; Meyfroidt, G. Artificial intelligence to guide management  
38  
39 339 of acute kidney injury in the ICU: a narrative review. *Curr Opin Crit Care* **2020**, *26*, 563-  
40  
41 340 573, doi:10.1097/MCC.0000000000000775.  
42  
43  
44  
45 341 16. James, M.T.; Pannu, N.; Hemmelgarn, B.R.; Austin, P.C.; Tan, Z.; McArthur, E.; Manns,  
46  
47 342 B.J.; Tonelli, M.; Wald, R.; Quinn, R.R., et al. Derivation and External Validation of  
48  
49 343 Prediction Models for Advanced Chronic Kidney Disease Following Acute Kidney Injury.  
50  
51 344 *JAMA* **2017**, *318*, 1787-1797, doi:10.1001/jama.2017.16326.  
52  
53  
54  
55  
56 345 17. Johnson, A.E.; Pollard, T.J.; Shen, L.; Lehman, L.W.; Feng, M.; Ghassemi, M.; Moody,  
57  
58 346 B.; Szolovits, P.A.-O.; Celi, L.A.; Mark, R.A.-O. MIMIC-III, a freely accessible critical  
59  
60

- 1  
2  
3  
4 347 care database.  
5  
6 348 18. Thorat, P.J.; Peppink, J.M.; Driessen, R.H.; Sijbrands, E.J.G.; Kompanje, E.J.O.;  
7  
8  
9 349 Kaplan, L.; Bailey, H.; Kesecioglu, J.; Cecconi, M.; Churpek, M., et al. Sharing ICU  
10  
11 350 Patient Data Responsibly Under the Society of Critical Care Medicine/European  
12  
13  
14 351 Society of Intensive Care Medicine Joint Data Science Collaboration: The Amsterdam  
15  
16  
17 352 University Medical Centers Database (AmsterdamUMCdb) Example. *Crit Care Med*  
18  
19 353 **2021**, 10.1097/CCM.0000000000004916, doi:10.1097/CCM.0000000000004916.  
20  
21  
22 354 19. Koyner, J.L.; Carey, K.A.; Edelson, D.P.; Churpek, M.M. The Development of a  
23  
24  
25 355 Machine Learning Inpatient Acute Kidney Injury Prediction Model. *Crit Care Med* **2018**,  
26  
27 356 *46*, 1070-1077, doi:10.1097/CCM.0000000000003123.  
28  
29

30 357

31  
32 358 **Footnotes**

33  
34  
35 359 Contributions: Conceptualization, QL and MH; Methodology, YX; Software, YX; Validation, YZ, and  
36  
37  
38 360 YX.; Formal Analysis, JC and XC; Resources, MH; Data Curation, QL; Writing – Original Draft  
39  
40  
41 361 Preparation, QL; Writing – Review & Editing, MH; Visualization, YX; Supervision, YZ and QL; Project  
42  
43 362 Administration, QL;

44  
45 363 **Funding:** This research received no specific grant from any funding agency in the public, commercial  
46  
47  
48 364 or not-for-profit sectors.

49  
50 365 Conflicts of Interest: Not Applicable.

51  
52  
53 366 Patient and public involvement Patients and/or the public were not involved in the design, or conduct, or  
54  
55  
56 367 reporting, or dissemination plans of this research.

57  
58 368 Provenance and peer review Not commissioned; externally peer reviewed.  
59  
60

1  
2  
3  
4 369 Acknowledgements: Thank my colleagues in general ICU for cooperating with us in our prospective  
5  
6 370 study. Thanks to two public databases namely MIMIC and AmsterdamUMC for providing important  
7  
8  
9 371 data.

10  
11  
12 372

13  
14 373 **Supplemental Figure:**

15  
16  
17 374 File name: **Figure S1.tif**

18  
19 375 Title and Description of data: The variable importance parameter histogram of early diagnosis prediction  
20  
21  
22 376 models of severe AKI uses a multiple logistic regression algorithm and five machine learning algorithms.

23  
24  
25 377 File name: **Figure S2.tif**

26  
27 378 Title and Description of data: The K-S curve used to determine the cut-off value of positive and negative  
28  
29  
30 379 diagnosis of early diagnosis prediction models of severe AKI.

31  
32  
33 380 File name: **Figure S3.tif**

34  
35 381 Title of data: The visual interface for prospective studies of the AKI early diagnosis prediction models.

36  
37 382 Description of data: Different patients have independent card display information, in which the last line  
38  
39  
40 383 of the card is the AKI diagnosis. The visual interface was not available to doctors during the prospective  
41  
42  
43 384 study and was used only by the researchers to verify the diagnosis and for sampling verification.

44  
45 385 File name: **Table S1.docx**

46  
47  
48 386 Title and of Description data: Missing data between three databases in the study and values included in  
49  
50  
51 387 the model.

52  
53 388 File name: **Table S2.docx**

54  
55  
56 389 Title and of Description data: Clinical Demographics and Outcomes of SHZJU-ICU patients in model  
57  
58  
59 390 building set and prospective validation.

1  
2  
3  
4 391 File name: **Table S3.docx**

5  
6 392 Title of data: TRIPOD Checklist of Prediction Model Development and Validation

7  
8  
9 393 Description of data: Writing norms of this type of research.

10  
11  
12 394

13  
14 395 **Figure Legend:**

15  
16  
17 396 Figure 1: The research flow chart. The data collection time interval of the study was 7 days before  
18  
19 397 diagnosis and the prediction interval was 48 hours. The early prediction model of AKI diagnosis was  
20  
21  
22 398 constructed and verified by our database and the MIMIC database and incorporated into the  
23  
24  
25 399 AmsterdamUMC database for external validation. We carried out a one-year prospective validation  
26  
27  
28 400 through the database of the centre.

29  
30 401 Figure 2: The AUROC curve of the internal validation set of the SHZJU-ICU database and the MIMIC  
31  
32  
33 402 database.

34  
35 403 Figure 3: The AUROC curve of the external validation set of the AmsterdamUMC database for 3A and  
36  
37  
38 404 the prospective validation in our center for 3B.

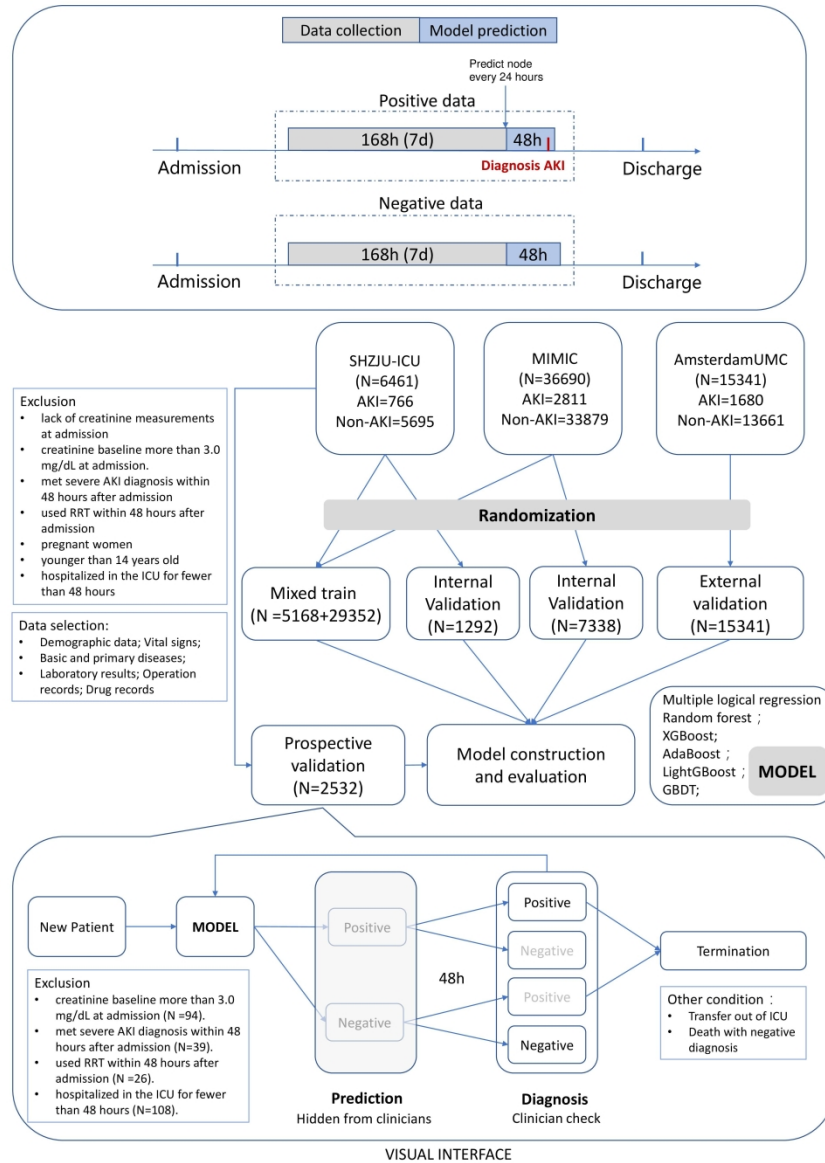

338x451mm (300 x 300 DPI)

1  
2  
3  
4  
5  
6  
7  
8  
9  
10  
11  
12  
13  
14  
15  
16  
17  
18  
19  
20  
21  
22  
23  
24  
25  
26  
27  
28  
29  
30  
31  
32  
33  
34  
35  
36  
37  
38  
39  
40  
41  
42  
43  
44  
45  
46  
47  
48  
49  
50  
51  
52  
53  
54  
55  
56  
57  
58  
59  
60

Internal validation set ROC curves

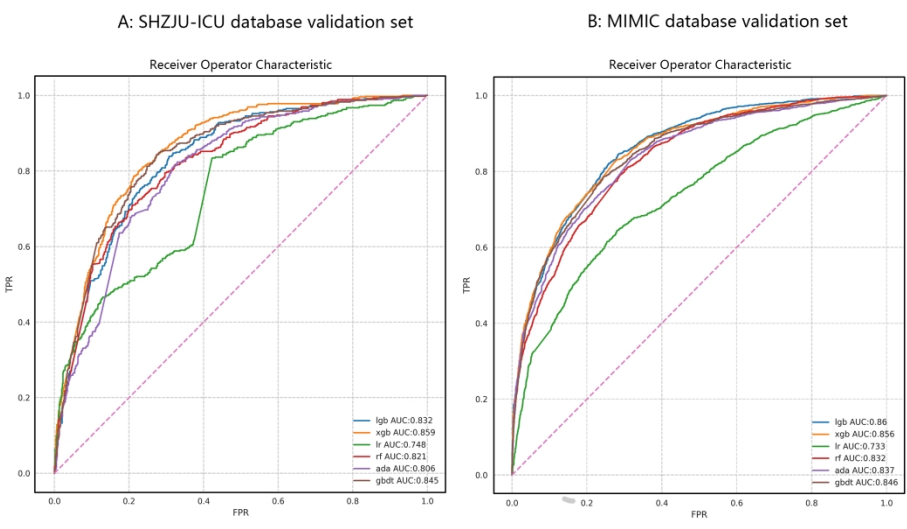



External and prospective validation set ROC curves

A: AmsterdamUMC database external validation set

B: SHZJU-ICU database prospective validation set

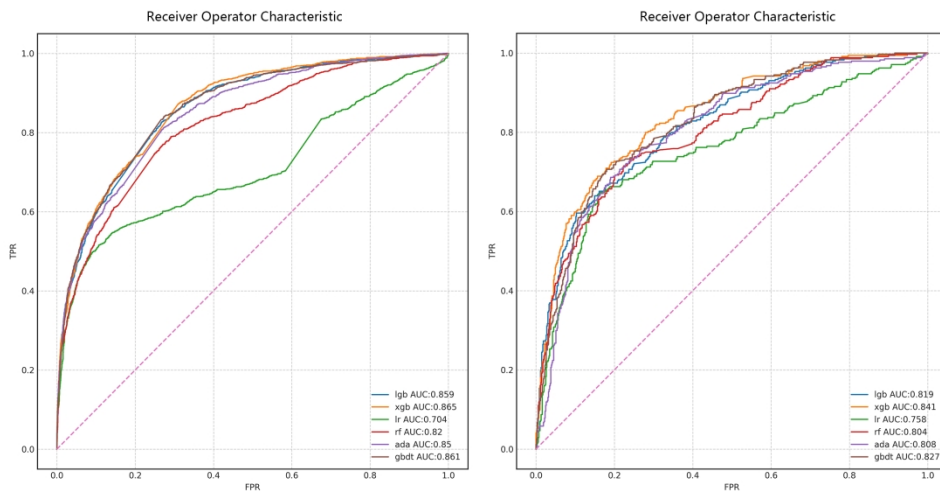

**Supplemental Figure:**

File name: **Figure S1.tif**

Title and Description of data: The variable importance parameter histogram of early diagnosis prediction models of severe AKI uses a multiple logistic regression algorithm and five machine learning algorithms.

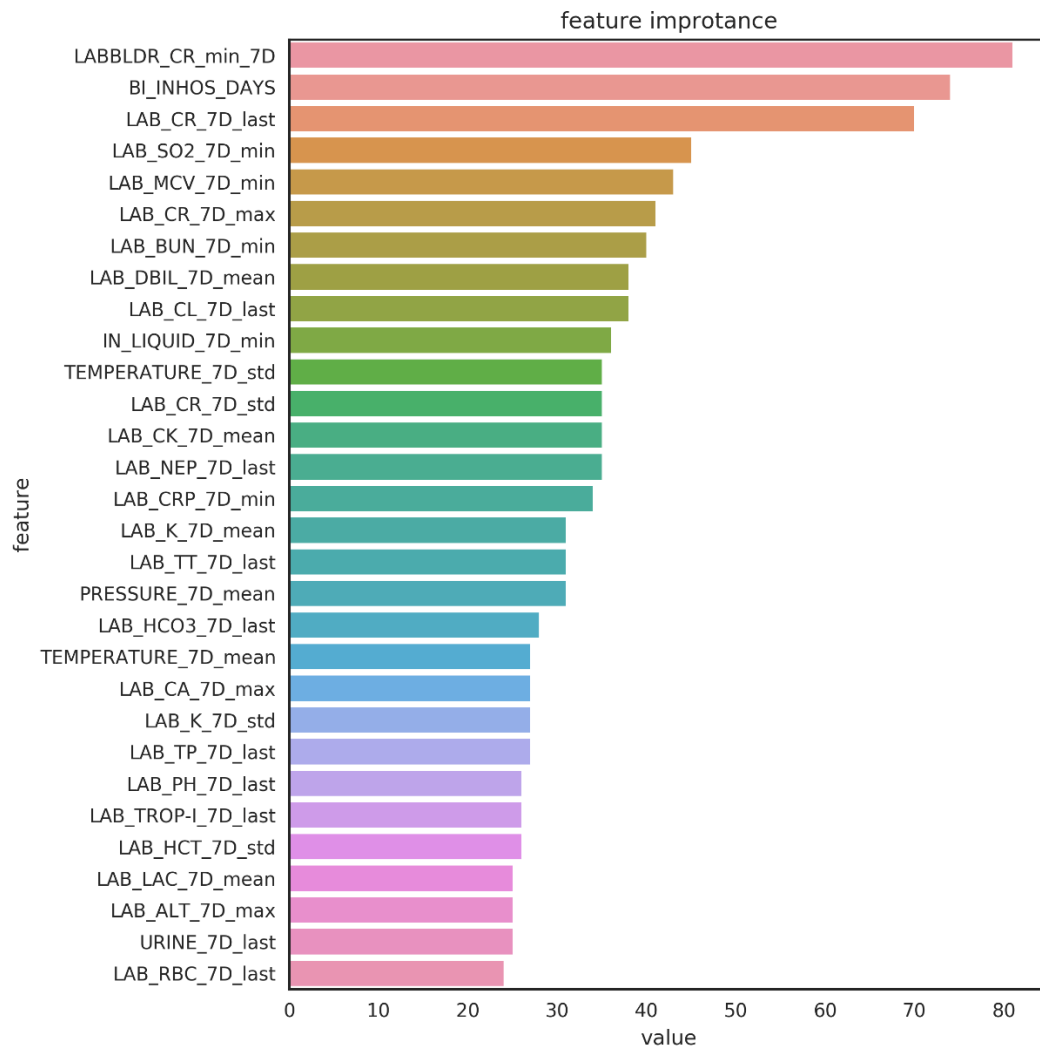

File name: **Figure S2.tif**

Title and Description of data: The K-S curve used to determine the cut-off value of positive and negative diagnosis of early diagnosis prediction models of severe AKI.

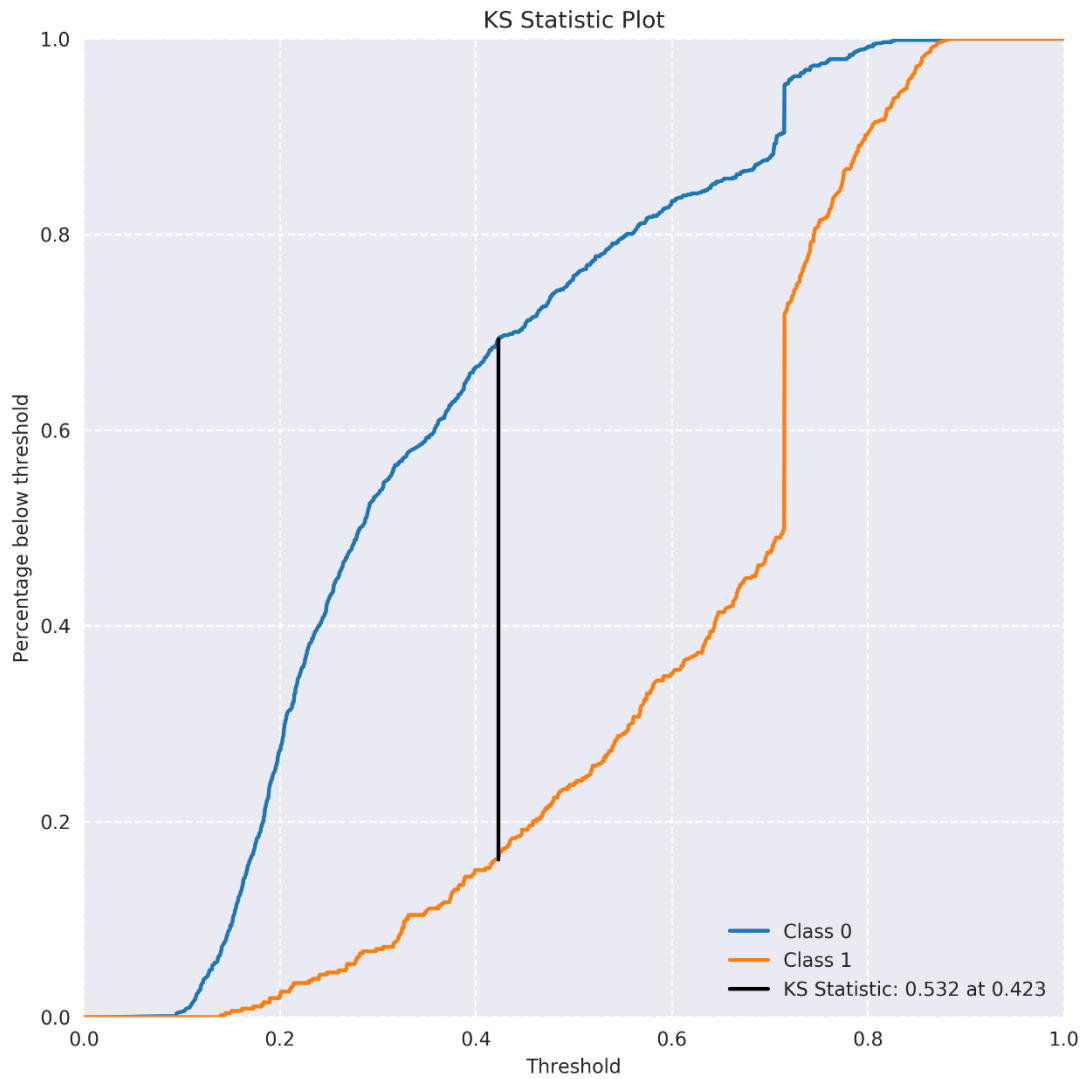

39 File name: **Figure S3. tif**

40 Title of data: The visual interface for prospective studies of the AKI early diagnosis prediction models.

41  
42  
43 Description of data: Different patients have independent card display information, in which the last line  
44  
45  
46  
47 of the card is the AKI diagnosis. The visual interface was not available to doctors during the prospective  
48  
49  
50 study and was used only by the researchers to verify the diagnosis and for sampling verification.

|                                                                                                                                               |                                                                                                                               |                                                                                                                                                         |
|-----------------------------------------------------------------------------------------------------------------------------------------------|-------------------------------------------------------------------------------------------------------------------------------|---------------------------------------------------------------------------------------------------------------------------------------------------------|
| <p><b>A002</b> 床 [redacted]</p> <p>1.烧伤2.低容量性休克3.气管切开后4.高血压</p> <p>APACHE II 27<br/>SOFA 缺失参数, 无法评估<br/>Sepsis 已发生sepsis ▲<br/>AKI 非AKI ▲</p> | <p>疑似转床</p> <p><b>A002</b> 床 [redacted]</p> <p>APACHE II 缺失参数, 无法评估<br/>SOFA 缺失参数, 无法评估<br/>Sepsis 低风险<br/>AKI 缺失参数, 无法评估</p> | <p><b>A003</b> 床 [redacted]</p> <p>1.累及体表45%的烧伤; 2.低蛋白血症; 3.低钠血症; 4.慢性支气管炎</p> <p>APACHE II 34<br/>SOFA 缺失参数, 无法评估<br/>Sepsis 低风险<br/>AKI 高肌酐型AKI ▲</p> |
| <p>疑似转床</p> <p><b>A004</b> 床 [redacted]</p> <p>APACHE II 缺失参数, 无法评估<br/>SOFA 缺失参数, 无法评估<br/>Sepsis 低风险<br/>AKI 缺失参数, 无法评估</p>                 | <p>疑似转床</p> <p><b>A004</b> 床 [redacted]</p> <p>APACHE II 缺失参数, 无法评估<br/>SOFA 缺失参数, 无法评估<br/>Sepsis 低风险<br/>AKI 缺失参数, 无法评估</p> | <p><b>A005</b> 床 [redacted]</p> <p>1.烧伤 体表 &gt; 90%的烧伤 2.呼吸衰竭</p> <p>APACHE II 37<br/>SOFA 缺失参数, 无法评估<br/>Sepsis 已发生sepsis ▲<br/>AKI 非AKI ▲</p>         |

File name: **Table S1.docx**

Title and of Description data: Missing data between three databases in the study and values included in the model.

|                           | SHZJU-ICU | MIMIC | AmsterdamUMC | Including in Model |
|---------------------------|-----------|-------|--------------|--------------------|
| <b>Age</b>                | √         | √     | √            | √                  |
| <b>Gender</b>             | √         | √     | √            | √                  |
| <b>Race</b>               | √         | √     | ×            | ×                  |
| <b>Primary disease</b>    | √         | √     | ×            | ×                  |
| <b>Comorbidity</b>        | √         | √     | ×            | ×                  |
| <b>Ventilation</b>        | √         | √     | √            | √                  |
| <b>Operation</b>          | √         | √     | ×            | ×                  |
| <b>ICU hours</b>          | √         | √     | √            | √                  |
| <b>Survived</b>           | √         | √     | √            | √                  |
| <b>Vital sign</b>         |           |       |              |                    |
| <b>Temperature</b>        | √         | √     | √            | √                  |
| <b>Systolic pressure</b>  | √         | √     | √            | √                  |
| <b>Diastolic pressure</b> | √         | √     | √            | √                  |
| <b>Respiratory rate</b>   | √         | √     | √            | √                  |
| <b>Heart rate</b>         | √         | √     | √            | √                  |
| <b>Oxygen saturation</b>  | √         | √     | √            | √                  |
| <b>Urine</b>              | √         | √     | √            | √                  |
| <b>GCS score</b>          | √         | ×     | ×            | ×                  |
| <b>Laboratory results</b> |           |       |              |                    |

|    |                         |   |   |   |
|----|-------------------------|---|---|---|
| 1  |                         |   |   |   |
| 2  |                         |   |   |   |
| 3  | <b>Scr</b>              | √ | √ | √ |
| 4  | <b>BUN</b>              | √ | √ | √ |
| 5  | <b>RBC</b>              | √ | √ | √ |
| 6  | <b>MCV</b>              | √ | √ | √ |
| 7  | <b>Hb</b>               | √ | √ | √ |
| 8  | <b>WBC</b>              | √ | √ | √ |
| 9  | <b>NEUT</b>             | √ | √ | √ |
| 10 | <b>PLT</b>              | √ | √ | √ |
| 11 | <b>HCV</b>              | √ | √ | × |
| 12 | <b>TBLB</b>             | √ | √ | √ |
| 13 | <b>DBLB</b>             | √ | √ | √ |
| 14 | <b>IBLB</b>             | √ | √ | √ |
| 15 | <b>CRP</b>              | √ | √ | √ |
| 16 | <b>PCT</b>              | √ | × | × |
| 17 | <b>Serum kalium</b>     | √ | √ | √ |
| 18 | <b>Serum natrium</b>    | √ | √ | √ |
| 19 | <b>Serum chlorine</b>   | √ | √ | √ |
| 20 | <b>PT</b>               | √ | √ | √ |
| 21 | <b>APTT</b>             | √ | √ | √ |
| 22 | <b>INR</b>              | √ | √ | √ |
| 23 | <b>CK</b>               | √ | √ | √ |
| 24 | <b>LDH</b>              | √ | √ | √ |
| 25 | <b>Troponin</b>         | √ | √ | √ |
| 26 | <b>Blood glucose</b>    | √ | √ | √ |
| 27 | <b>PH</b>               | √ | √ | √ |
| 28 | <b>Lactic acid</b>      | √ | √ | √ |
| 29 | <b>Anion gap</b>        | √ | √ | √ |
| 30 | <b>ABC</b>              | √ | √ | √ |
| 31 | <b>SBC</b>              | √ | √ | √ |
| 32 | <b>PaCO<sub>2</sub></b> | √ | √ | √ |
| 33 | <b>PaO<sub>2</sub></b>  | √ | √ | √ |
| 34 |                         |   |   |   |
| 35 |                         |   |   |   |
| 36 |                         |   |   |   |
| 37 |                         |   |   |   |
| 38 |                         |   |   |   |
| 39 |                         |   |   |   |
| 40 |                         |   |   |   |
| 41 |                         |   |   |   |
| 42 |                         |   |   |   |
| 43 |                         |   |   |   |
| 44 |                         |   |   |   |

SHZJU-ICU: The general ICU database of the second affiliated hospital of Zhejiang university school of medicine; MIMIC: Medical Information Mart for Intensive Care; APTT: Activated partial thromboplastin time; INR: International normalized ratio; LDH: Lactate dehydrogenase; PaCO<sub>2</sub>: Partial pressure of carbon dioxide; PaO<sub>2</sub> Partial pressure of oxygen; MCV: Mean corpuscular volume; PH: Potential of hydrogen; WBC: White blood cell count; NEUT: Proportion of neutrophils; CK: Creatine kinase; Scr: Serum Creatinine; BUN: Blood urea nitrogen; RBC: Red blood cell count; Hb: Hemoglobin; PT: Prothrombin time; TBLB: Total bilirubin; DBLB: Direct bilirubin; IBLB: Indirect bilirubin; CRP: C-reactive protein; HCV: Hematocrit value; PCT: Procalcitonin; ABC: Actual Bicarbonate Radical; SBC: Standard Bicarbonate Radical; PLT: Platelet count

File name: **Table S2.docx**

Title and of Description data: Clinical Demographics and Outcomes of SHZJU-ICU patients in model

building set and prospective validation.

|                                         | SHZJU-ICU<br>Negative<br>(N=5695) | SHZJU-ICU<br>Severe AKI<br>(N=766) | P-value | SHZJU-ICU<br>Prospective<br>Negative<br>(N=2188) | SHZJU-ICU<br>Prospective<br>Positive<br>(N=344) | P-value |
|-----------------------------------------|-----------------------------------|------------------------------------|---------|--------------------------------------------------|-------------------------------------------------|---------|
| <b>Age, median [IQR]</b>                | 60.5<br>[48.8-70.1]               | 62.1<br>[50.1-72.5]                | 0.004   | 61.3<br>[47.5-73.4]                              | 62.1<br>[51.2-70.5]                             | 0.03    |
| <b>Gender, male (%)</b>                 | 3561 (64.9)                       | 438 (59.8)                         | 0.007   | 1365 (62.4)                                      | 207 (60.2)                                      | 0.438   |
| <b>Race</b>                             |                                   |                                    |         |                                                  |                                                 |         |
| <b>White</b>                            | 3 (0.05)                          | 1 (0.1)                            | 1       | 2 (0.001)                                        | 0                                               | 1       |
| <b>Black</b>                            | 1 (0.02)                          | 0                                  | 1       | 0                                                | 0                                               | 1       |
| <b>Asian</b>                            | 5691(99.9)                        | 764 (99.7)                         | 1       | 2185 (99.9)                                      | 344(100)                                        | 1       |
| <b>Other</b>                            | 0                                 | 1 (0.1)                            | 1       | 1 (0.001)                                        | 0                                               | 1       |
| <b>Admission Scr (mg/dL), mean (sd)</b> | 0.9 (0.34)                        | 1.0 (0.40)                         | <0.001  | 0.8 (0.32)                                       | 0.9 (0.35)                                      | <0.001  |
| <b>Admission BUN (mg/dL), mean (sd)</b> | 18 (11)                           | 21 (9)                             | <0.001  | 17 (11)                                          | 20 (10)                                         | 0.007   |
| <b>Cancer, n (%)</b>                    | 644 (11.3)                        | 48 (6.3)                           | <0.001  | 230 (10.5)                                       | 26 (7.6)                                        | 0.102   |
| <b>Cirrhosis, n (%)</b>                 | 43 (0.8)                          | 6 (0.8)                            | 0.89    | 15 (0.7)                                         | 3 (0.8)                                         | 0.726   |
| <b>Cardiopathy, n (%)</b>               | 231 (4.1)                         | 42 (5.5)                           | 0.08    | 98 (4.5)                                         | 19 (5.7)                                        | 0.403   |
| <b>Diabetes, n (%)</b>                  | 305 (5.4)                         | 63 (8.2)                           | 0.002   | 142 (6.5)                                        | 29 (8.6)                                        | 0.203   |
| <b>Hypertension, n (%)</b>              | 889 (15.6)                        | 115 (15.0)                         | 0.70    | 324(14.8)                                        | 56 (16.4)                                       | 0.466   |
| <b>Ventilation, n (%)</b>               | 2569 (45.1)                       | 592 (77.3)                         | <0.001  | 1102 (50.4)                                      | 239 (69.5)                                      | <0.001  |
| <b>Operation, n (%)</b>                 | 3361 (59.1)                       | 373 (48.7)                         | <0.001  | 1234(56.4)                                       | 160 (46.7)                                      | 0.001   |
| <b>ICU Hours, median [IQR]</b>          | 50.8<br>[23.0-139.5]              | 164.4<br>[70.3-328.6]              | <0.001  | 58.7<br>[34.2-160.4]                             | 145.6<br>[68.5-314.8]                           | <0.001  |
| <b>Survived, n (%)</b>                  | 4997 (87.7)                       | 380 (49.6)                         | <0.001  | 1868 (85.4)                                      | 178 (51.9)                                      | <0.001  |

SHZJU-ICU: The general ICU database of the second affiliated hospital of Zhejiang university school of medicine; MIMIC: Medical Information Mart for Intensive Care; IQR: Inter-Quartile Range; ICU: Intensive Care Unit; AKI: Acute Kidney Injury. Scr: serum creatinine; BUN: blood urea nitrogen.

File name: **Table S3.docx**

Title of data: TRIPOD Checklist of Prediction Model Development and Validation

Description of data: Writing norms of this type of research.

| 1Section/Topic               |     | Checklist Item |                                                                                                                                                                                                  | Page            |
|------------------------------|-----|----------------|--------------------------------------------------------------------------------------------------------------------------------------------------------------------------------------------------|-----------------|
| <b>Title and abstract</b>    |     |                |                                                                                                                                                                                                  |                 |
| Title                        | 1   | D;V            | Identify the study as developing and/or validating a multivariable prediction model, the target population, and the outcome to be predicted.                                                     | Yes; P1         |
| Abstract                     | 2   | D;V            | Provide a summary of objectives, study design, setting, participants, sample size, predictors, outcome, statistical analysis, results, and conclusions.                                          | Yes; P2         |
| <b>Introduction</b>          |     |                |                                                                                                                                                                                                  |                 |
| Background and objectives    | 3a  | D;V            | Explain the medical context (including whether diagnostic or prognostic) and rationale for developing or validating the multivariable prediction model, including references to existing models. | Yes; P3         |
|                              | 3b  | D;V            | Specify the objectives, including whether the study describes the development or validation of the model or both.                                                                                | Yes; P4, L76-79 |
| <b>Methods</b>               |     |                |                                                                                                                                                                                                  |                 |
| Source of data               | 4a  | D;V            | Describe the study design or source of data (e.g., randomized trial, cohort, or registry data), separately for the development and validation data sets, if applicable.                          | Yes; P4, L80    |
|                              | 4b  | D;V            | Specify the key study dates, including start of accrual; end of accrual; and, if applicable, end of follow-up.                                                                                   | Yes; P4, L84-86 |
| Participants                 | 5a  | D;V            | Specify key elements of the study setting (e.g., primary care, secondary care, general population) including number and location of centres.                                                     | Yes             |
|                              | 5b  | D;V            | Describe eligibility criteria for participants.                                                                                                                                                  | Yes; P5, L104   |
|                              | 5c  | D;V            | Give details of treatments received, if relevant.                                                                                                                                                | NA              |
| Outcome                      | 6a  | D;V            | Clearly define the outcome that is predicted by the prediction model, including how and when assessed.                                                                                           | Yes; P6, L111   |
|                              | 6b  | D;V            | Report any actions to blind assessment of the outcome to be predicted.                                                                                                                           | NA              |
| Predictors                   | 7a  | D;V            | Clearly define all predictors used in developing or validating the multivariable prediction model, including how and when they were measured.                                                    | Yes; P6, L116   |
|                              | 7b  | D;V            | Report any actions to blind assessment of predictors for the outcome and other predictors.                                                                                                       | NA              |
| Sample size                  | 8   | D;V            | Explain how the study size was arrived at.                                                                                                                                                       | NA              |
| Missing data                 | 9   | D;V            | Describe how missing data were handled (e.g., complete-case analysis, single imputation, multiple imputation) with details of any imputation method.                                             | Yes; P6, L127   |
| Statistical analysis methods | 10a | D              | Describe how predictors were handled in the analyses.                                                                                                                                            | Yes; P6, L116   |
|                              | 10b | D              | Specify type of model, all model-building procedures (including any predictor selection), and method for internal validation.                                                                    | Yes; P6, L119   |
|                              | 10c | V              | For validation, describe how the predictions were calculated.                                                                                                                                    | Yes; P6, L126   |
|                              | 10d | D;V            | Specify all measures used to assess model performance and, if relevant, to compare multiple models.                                                                                              | Yes; P6, L159   |
|                              | 10e | V              | Describe any model updating (e.g., recalibration) arising from the validation, if done.                                                                                                          | NA              |
| Risk groups                  | 11  | D;V            | Provide details on how risk groups were created, if done.                                                                                                                                        | Yes; P6, L111   |

|                            |    |     |                                                                                                                                                                                                       |                   |
|----------------------------|----|-----|-------------------------------------------------------------------------------------------------------------------------------------------------------------------------------------------------------|-------------------|
| Development vs. validation | 12 | V   | For validation, identify any differences from the development data in setting, eligibility criteria, outcome, and predictors.                                                                         | Yes; P6, L132     |
| <b>Results</b>             |    |     |                                                                                                                                                                                                       |                   |
| Participants               | 3a | D;V | Describe the flow of participants through the study, including the number of participants with and without the outcome and, if applicable, a summary of the follow-up time. A diagram may be helpful. | Yes; Figure 1     |
|                            | 3b | D;V | Describe the characteristics of the participants (basic demographics, clinical features, available predictors), including the number of participants with missing data for predictors and outcome.    | Yes, P8, L168-180 |
|                            | 3c | V   | For validation, show a comparison with the development data of the distribution of important variables (demographics, predictors and outcome).                                                        | Yes, Table2       |
| Model development          | 4a | D   | Specify the number of participants and outcome events in each analysis.                                                                                                                               | Yes, P8, L168     |
|                            | 4b | D   | If done, report the unadjusted association between each candidate predictor and outcome.                                                                                                              | Yes               |
| Model specification        | 5a | D   | Present the full prediction model to allow predictions for individuals (i.e., all regression coefficients, and model intercept or baseline survival at a given time point).                           | Yes.              |
|                            | 5b | D   | Explain how to use the prediction model.                                                                                                                                                              | Yes, P9, L196     |
| Model performance          | 16 | D;V | Report performance measures (with CIs) for the prediction model.                                                                                                                                      | Yes, P9, L190     |
| Model-updating             | 17 | V   | If done, report the results from any model updating (i.e., model specification, model performance).                                                                                                   | NA                |
| <b>Discussion</b>          |    |     |                                                                                                                                                                                                       |                   |
| Limitations                | 18 | D;V | Discuss any limitations of the study (such as nonrepresentative sample, few events per predictor, missing data).                                                                                      | Yes, P12, L236    |
| Interpretation             | 9a | V   | For validation, discuss the results with reference to performance in the development data, and any other validation data.                                                                             | Yes, P11, L217    |
|                            | 9b | D;V | Give an overall interpretation of the results, considering objectives, limitations, results from similar studies, and other relevant evidence.                                                        | Yes, P10 L198     |
| Implications               | 20 | D;V | Discuss the potential clinical use of the model and implications for future research.                                                                                                                 | Yes, P9, L193     |
| <b>Other information</b>   |    |     |                                                                                                                                                                                                       |                   |
| Supplementary information  | 21 | D;V | Provide information about the availability of supplementary resources, such as study protocol, Web calculator, and data sets.                                                                         | Yes               |
| Funding                    | 22 | D;V | Give the source of funding and the role of the funders for the present study.                                                                                                                         | NA                |



# BMJ Open

## Severe Acute Kidney Injury Predicting Model based on transcontinental databases: a single-center perspective study

|                                 |                                                                                                                                                                                                                                                                                                                                                                                                                                                              |
|---------------------------------|--------------------------------------------------------------------------------------------------------------------------------------------------------------------------------------------------------------------------------------------------------------------------------------------------------------------------------------------------------------------------------------------------------------------------------------------------------------|
| Journal:                        | <i>BMJ Open</i>                                                                                                                                                                                                                                                                                                                                                                                                                                              |
| Manuscript ID                   | bmjopen-2021-054092.R2                                                                                                                                                                                                                                                                                                                                                                                                                                       |
| Article Type:                   | Original research                                                                                                                                                                                                                                                                                                                                                                                                                                            |
| Date Submitted by the Author:   | 21-Nov-2021                                                                                                                                                                                                                                                                                                                                                                                                                                                  |
| Complete List of Authors:       | Liang, Qiqiang; Zhejiang University School of Medicine Second Affiliated Hospital<br>Xu, Yongfeng; HealSci Technology Co<br>Zhou, Yu; Zhejiang University School of Medicine Second Affiliated Hospital<br>Chen, Xinyi; Zhejiang University School of Medicine Second Affiliated Hospital<br>Chen, Juan; Zhejiang University School of Medicine Second Affiliated Hospital<br>Huang, Man; Zhejiang University School of Medicine Second Affiliated Hospital, |
| <b>Primary Subject Heading</b>: | Intensive care                                                                                                                                                                                                                                                                                                                                                                                                                                               |
| Secondary Subject Heading:      | Diagnostics                                                                                                                                                                                                                                                                                                                                                                                                                                                  |
| Keywords:                       | Acute renal failure < NEPHROLOGY, INTENSIVE & CRITICAL CARE, Information technology < BIOTECHNOLOGY & BIOINFORMATICS, Adult intensive & critical care < INTENSIVE & CRITICAL CARE                                                                                                                                                                                                                                                                            |
|                                 |                                                                                                                                                                                                                                                                                                                                                                                                                                                              |

SCHOLARONE™  
Manuscripts



I, the Submitting Author has the right to grant and does grant on behalf of all authors of the Work (as defined in the below author licence), an exclusive licence and/or a non-exclusive licence for contributions from authors who are: i) UK Crown employees; ii) where BMJ has agreed a CC-BY licence shall apply, and/or iii) in accordance with the terms applicable for US Federal Government officers or employees acting as part of their official duties; on a worldwide, perpetual, irrevocable, royalty-free basis to BMJ Publishing Group Ltd ("BMJ") its licensees and where the relevant Journal is co-owned by BMJ to the co-owners of the Journal, to publish the Work in this journal and any other BMJ products and to exploit all rights, as set out in our [licence](#).

The Submitting Author accepts and understands that any supply made under these terms is made by BMJ to the Submitting Author unless you are acting as an employee on behalf of your employer or a postgraduate student of an affiliated institution which is paying any applicable article publishing charge ("APC") for Open Access articles. Where the Submitting Author wishes to make the Work available on an Open Access basis (and intends to pay the relevant APC), the terms of reuse of such Open Access shall be governed by a Creative Commons licence – details of these licences and which [Creative Commons](#) licence will apply to this Work are set out in our licence referred to above.

Other than as permitted in any relevant BMJ Author's Self Archiving Policies, I confirm this Work has not been accepted for publication elsewhere, is not being considered for publication elsewhere and does not duplicate material already published. I confirm all authors consent to publication of this Work and authorise the granting of this licence.

1  
2  
3  
4 **1 Severe Acute Kidney Injury Predicting Model based on transcontinental**  
5  
6 **2 databases: a single-center perspective study**  
7  
8

9 **3** Qiqiang Liang<sup>1</sup>; Yongfeng Xu<sup>2</sup>; Yu Zhou<sup>1</sup>; Xinyi Chen<sup>1</sup>, MM; Juan Chen<sup>1</sup>; Man Huang<sup>1\*</sup>  
10

11 **4** <sup>1</sup>General Intensive Care Unit, Second Affiliated Hospital of Zhejiang University School of Medicine, Hangzhou,  
12  
13  
14 **5** China.  
15

16 **6** <sup>2</sup>BSc, HealSci Technology Co., Ltd, Beijing China.  
17

18  
19 **7** \*Corresponding author: Man Huang, MD PhD.  
20

21  
22 **8** Department: General Intensive Care Unit  
23

24  
25 **9** Hospital: Second Affiliated Hospital of Zhejiang University School of Medicine  
26

27  
28 **10** Address: No. 1511, Jianghong Road, Bingjiang District, Hangzhou City, Zhejiang Province  
29

30  
31 **11** Tel: + 86 571 89713427  
32

33  
34 **12** Fax: + 86 571 89713427  
35

36  
37 **13** E-mail: [huangman@zju.edu.cn](mailto:huangman@zju.edu.cn).  
38

39  
40 **14** ORCID: 0000-0002-0842-2254  
41

42  
43 **15**  
44

45  
46 **16**  
47

48  
49 **17**  
50

51  
52 **18**  
53

54  
55 **19**  
56

57  
58 **20**  
59

60  
**21**

**22**

1  
2  
3  
4 **23 Abstract:**

5  
6 **24 Objectives:** There are many studies of acute kidney injury (AKI) diagnosis models lack of external  
7  
8  
9 **25 validation and prospective validation.** We constructed the models using three databases to predict severe  
10  
11  
12 **26 AKI within 48 hours in intensive care unit (ICU) patients.**

13  
14 **27 Design:** A retrospective and prospective cohort study.

15  
16  
17 **28 Setting:** We studied critically ill patients in our database (SHZJU-ICU) and two other public databases,  
18  
19  
20 **29 the Medical Information Mart for Intensive Care (MIMIC) and AmsterdamUMC databases, including**  
21  
22  
23 **30 basic demographics, vital signs, and laboratory results.** We predicted the diagnosis of severe AKI in  
24  
25 **31 patients in the next 48 hours using machine-learning algorithms with the three databases.** Then, we  
26  
27 **32 carried out real-time severe AKI prediction in the prospective validation study at our centre for one year.**

28  
29  
30 **33 Participants:** All patients included in three databases with uniform exclusion criteria.

31  
32  
33 **34 Primary and secondary outcome measures:** Effect evaluation index of prediction models.

34  
35  
36 **35 Results:** We included 58492 patients, and a total of 5257 (9.0%) patients met the definition of severe  
37  
38 **36 AKI.** In the internal validation of the SHZJU-ICU and MIMIC databases, the best area under the receiver  
39  
40  
41 **37 operating characteristic curve (AUROC) of the model was 0.86.** The external validation results by  
42  
43 **38 AmsterdamUMC database were also satisfactory, with the best AUROC of 0.86.** A total of 2532 patients  
44  
45  
46 **39 were admitted to the center for prospective validation; 358 positive results were predicted, and 344**  
47  
48  
49 **40 patients were diagnosed with severe AKI, with the best sensitivity of 0.72, the specificity of 0.80, and**  
50  
51 **41 the AUROC of 0.84.**

52  
53  
54 **42 Conclusion:** The prediction model of severe AKI exhibits promises as a clinical application based on  
55  
56  
57 **43 dynamic vital signs and laboratory results of multi-center databases with prospective and external**  
58  
59 **44 validation.**

1  
2  
3  
4 45 **Keywords:** Machine learning; Acute kidney injury; Real-time prospective validation; External  
5  
6 46 validation.

7  
8  
9 47 **Strengths and limitations of this study:**

10  
11 48 A prospective validation in machine learning of AKI research rather than other studies;

12  
13 49 Three large database containing different national populations and regions;

14  
15 50 Variable's sampling limited by the monitoring frequency of clinical data;

16  
17 51 Differences in the samples proportion of three databases;

18  
19 52 The dimensions of variables are not rich enough.

20  
21 53

22  
23 54 **Introduction:**

24  
25 55 Acute kidney injury (AKI), as a common clinical complication in the intensive care unit (ICU),

26  
27 56 significantly increases the duration of hospitalization and mortality[1]. AKI is divided into three types

28  
29 57 according to the various aetiologies: prerenal (renal hypoperfusion), intrarenal (vascular, glomerular, or

30  
31 58 tubulointerstitial lesions), and postrenal (urinary tract obstruction)[2]. Although nearly all diseases

32  
33 59 associated with ICU admission may cause AKI, acute tubular necrosis (ATN) and prerenal azotaemia

34  
35 60 are the most common causes[3].

36  
37 61 All AKI diagnostic criteria including the latest Kidney Disease: Improving Global Outcomes (KDIGO)

38  
39 62 standard are currently based on the creatinine level and urine volume[4]. However, the increase in the

40  
41 63 creatinine level or decrease in the urine volume lags the onset of AKI[2]. Many studies have suggested

42  
43 64 that early diagnosis and treatment of reversible AKI can reduce mortality[5]. Therefore, the creatinine

44  
45 65 level and urine volume are not satisfactory to meet clinical diagnostic demands. Consequently, many

46  
47 66 researchers have tried to develop an early warning model by analysing the risk factors for AKI[6].

1  
2  
3  
4 67 Patient complications, such as diabetes, hypertension, cardiovascular disease, chronic liver disease,  
5  
6 68 sepsis, and trauma, are identified as important risk factors for AKI[7]. The AKI prediction model and  
7  
8  
9 69 scoring system developed based on high-risk factors has gradually become the focus of research  
10  
11 70 considering the lower clinical application threshold compared with that of new biomarkers[6]. Although  
12  
13  
14 71 most previous prediction models use the multiple logistic regression model, a variety of AKI prediction  
15  
16  
17 72 models based on machine learning have resulted in satisfactory outcomes[6]. Since the first AKI  
18  
19 73 prediction model study based on artificial intelligence was published in 2016, researchers have built more  
20  
21  
22 74 than 20 published AKI prediction models successively by using local or multi-centre databases[6,8-14].  
23  
24  
25 75 The results indicate that these models can predict the occurrence of AKI and the need for renal  
26  
27 76 replacement therapy (RRT) within 24 or 48 hours, with accuracies ranging from 81% to 97%[6,15]. In  
28  
29  
30 77 addition, many studies have focused on subspecialized conditions, including cardiac surgery, trauma,  
31  
32  
33 78 and burns[14-16]. However, the common defect in these studies is the lack of external validation and  
34  
35  
36 79 prospective validation, which causes the prediction model to deviate from the clinical scenarios and limits  
37  
38 80 extrapolation beyond the scope of the data.

39  
40 81 In this study, we built models to predict AKI within 48 hours in critically ill patients by using  
41  
42  
43 82 transcontinental three databases. Then, we evaluated the clinical effect of the model through a one-year  
44  
45  
46 83 prospective validation at our centre.

47  
48 84

## 49 50 85 **Methods:**

### 51 52 86 **Study design and setting**

53  
54  
55 87 We collected patients using three ICU databases and prospectively validated the models in our centre.

56  
57  
58 88 The first database was our centre general ICU database (SHZJU-ICU) of the Second Affiliated Hospital  
59  
60

1  
2  
3  
4 89 of Zhejiang University School of Medicine, an academic teaching hospital. Since its establishment in  
5  
6 90 2017, it has included 12000 ICU patients' data and is updated daily. The Medical Information Mart for  
7  
8  
9 91 Intensive Care (MIMIC) III database, the second one, is an open ICU database provided by the  
10  
11 92 Massachusetts Institute of Technology and includes nearly 60000 ICU patients from North America[17].  
12  
13  
14 93 Lastly, the AmsterdamUMC database is an available European ICU database with health data related to  
15  
16  
17 94 23000 patients admitted to ICUs in parts of Europe[18]. The research flow chart is shown in Figure 1.  
18  
19  
20 95

## 21 22 96 **Study definition**

23  
24  
25 97 In this study, the diagnosis of AKI was confirmed based on three stages according to the KDIGO  
26  
27 98 criteria[4]. We defined the patients who met the KDIGO AKI II and III criteria as severe AKI groups  
28  
29  
30 99 and the others as negative groups. We excluded patients with lack of creatinine measurements during  
31  
32  
33 100 admission, patients with creatinine baseline more than 3.0 mg/dL at admission, patients who met severe  
34  
35 101 AKI diagnosis within 24 hours, and patients who used RRT within 48 hours after admission[19]. In  
36  
37  
38 102 addition, we excluded pregnant women, patients younger than 14 years old, and patients hospitalized in  
39  
40 103 the ICU for fewer than 48 hours. After the patient was admitted to ICU, we performed a prediction every  
41  
42  
43 104 24 hours and recorded a prediction time. If the patient was diagnosed with severe AKI within 48 hours,  
44  
45 105 the predictive time was defined as a positive predictive point, and the others were defined as a negative  
46  
47  
48 106 point. The study was evaluated and approved by the Ethics Committee of the Second Affiliated Hospital  
49  
50  
51 107 of Zhejiang University School of Medicine as study number 2019-078.

## 52 53 108 **Data Collection**

54  
55  
56 109 The variables included demographic data, vital signs, basic and primary diseases, laboratory results,  
57  
58 110 important operation records, and drug records. Comorbidity included hypertension, diabetes, cardiopathy,  
59  
60

1  
2  
3  
4 111 liver disease, and malignant tumors. The primary disease was the main cause of admission to the ICU  
5  
6 112 following the ICD-10 codes. The vital signs and clinical laboratory results were transformed into  
7  
8  
9 113 different variables according to the average, variance, maximum, minimum, and final value before  
10  
11 114 diagnosis. We use a method similar to the forward incremental method in the multivariate logic  
12  
13  
14 115 regression model, that is, the combination of embedded feature selection and forward addition for feature  
15  
16  
17 116 selection. First of all, all variables are trained in the model, then list by variables importance. variables  
18  
19 117 are added to the model one by one according to the variable importance. a variable is retained if it causes  
20  
21  
22 118 the AUC growth to be greater than 0.01, otherwise delete it. We transformed the MIMIC and  
23  
24  
25 119 AmsterdamUMC databases according to our centre database structure, unifying the unit and diagnostic  
26  
27 120 codes. We deleted variables missing more than 50%. Variables missing more than 30% but less than 50%  
28  
29  
30 121 are listed to clinicians who determine the potential correlation between these variables and AKI. We  
31  
32 122 carry out multiple interpolation for these variables which clinicians require to be retained, and the others  
33  
34  
35 123 deleted. Variables missing less than 30% are fill in multiple interpolation. All Missing data between three  
36  
37 124 databases and values included in the model shown in supplementation file Table S1.

#### 125 **Model construction and external validation**

126 The ratio of the training and internal validation sets was 4:1. The SHZJU and MIMIC databases  
127 training sets were mixed into a new training set. There were more negative data than positive data, so we  
128 randomly sampled the negative datasets and constructed a new data subset with a sampling ratio of  
129 positive and negative data of 1:5 in model building in order to extract the importance variables. In the  
130 subsequent model validation, we adopted the original data set. We used multiple logistic regression,  
131 random forest, XGBoost, AdaBoost, LightGBoost, gradient boosting decision tree (GBDT), and debug  
132 to assess the variables and model-related parameters by the fivefold cross-validation method. After the



1  
2  
3  
4 133 models were built, we used the SHZJU-ICU and MIMIC test sets for internal validation of the model and  
5  
6 134 the AmsterdamUMC database for external validation. The most appropriate cut-off value was determined  
7  
8  
9 135 according to the K-S curve. The prediction model represents the results of each prediction with a  
10  
11  
12 136 probability between 0 to 1.0. We define results more than 0.4 as high-risk, that is, positive results, and  
13  
14 137 the rest as negative results. Through internal validation and external validation, we calibrated the model  
15  
16  
17 138 by adjusting the super-parameters and using the Platt calibration algorithm and compared the calibration  
18  
19  
20 139 effect by drawing a reliability diagram. All model building and validation processes were performed in  
21  
22 140 Python 3.6.

#### 23 24 25 141 **Prospective validation**

26  
27 142 The prospective research period was 2020.01.01 to 2020.12.31. We collected real-time data when  
28  
29  
30 143 patients were admitted to the ICU, transformed the data according to the requirements, and formed a  
31  
32  
33 144 complete sample for the prediction model after passing the integrity test. We had established a  
34  
35  
36 145 visualization scheme and allowed researchers to review the predictions daily. The daily prediction results  
37  
38 146 were not publicly accessible during the study to avoid affecting clinicians' decisions, but the diagnosis  
39  
40  
41 147 results were available to the researchers as visual graphics. We sampled the 20% predicted data every  
42  
43  
44 148 month and deleted samples with more than 50% missing values to ensure data correctness. When a patient  
45  
46  
47 149 has the following conditions, AKI prediction system will end the patient's prospective prediction: A. a  
48  
49  
50 150 positive diagnosis; B. Transfer out of ICU or death with negative diagnosis. All diagnosis of severe AKI  
51  
52  
53 151 needs to be reviewed by two ICU attending physicians independently, and if the they have different  
54  
55  
56 152 opinion, the third one will be appealed.

#### 57 58 59 153 **Statistical analysis:**

60 154 The population characteristics were reported as the medians and inter-quartile ranges (IQRs) for

1  
2  
3  
4 155 skewed data and the means and standard deviations for normally distributed data. The independent  
5  
6 156 sample T-test was used for normally distributed data, and the rank-sum test was used for the rest.  
7  
8  
9 157 Dichotomous variables were assessed by the chi-square test, and a P value less than 0.05 was considered  
10  
11 158 statistically significant. The non-normally distributed data were analyzed by exponential transformation  
12  
13  
14 159 and logarithmic transformation. The effect of the model was evaluated by parameters such as the  
15  
16  
17 160 AUROC, accuracy, specificity, and F1-score.

### 19 161 **Patient and Public Involvement:**

22 162 The information of cases in three databases was in a state of complete desensitization in the process  
23  
24 163 of building the model. During the prospective study, all the patients signed an informed consent form at  
25  
26  
27 164 the beginning of admission to ICU. The real-time data discussed and used by only the study members,  
28  
29  
30 165 and were not made public during the study period. All data were anonymized before the authors accessed  
31  
32 166 them for the purpose of this study. Therefore, patients' priorities, experience, and preferences will not  
33  
34  
35 167 affect the development of the research question and outcome measures. If necessary, we will inform  
36  
37  
38 168 patients of relevant research results by telephone.

40 169

### 43 170 **Results:**

45 171 According to the inclusion criteria and exclusion criteria, we selected 58492 patients from three  
46  
47  
48 172 databases who met the requirements of the study, including 6461 patients from the SHZJU-ICU database,  
49  
50  
51 173 36690 patients from the MIMIC database, and 15341 patients from the AmsterdamUMC database. A  
52  
53 174 total of 5257 (9.0%) patients met the definition of severe AKI (11.8% in SHZJU-ICU, 7.6% in MIMIC,  
54  
55  
56 175 and 10.9% in AmsterdamUMC). The distributions of age and sex in the three centers were similar, but  
57  
58  
59 176 the differences in race were large. Asian patients accounted for more than 99% in the SHZJU-ICU

177 database, and only approximately 2.5% in the MIMIC database. White people accounted for more than  
 178 70% of the MIMIC database. In addition, patients from the MIMIC database had a higher incidence of  
 179 the tumor, liver cirrhosis, diabetes, and hypertension. Patients in the AmsterdamUMC and SHZJU-ICU  
 180 databases had a higher proportion of mechanical ventilation and overall survival rate. Severe AKI  
 181 patients had longer ICU hospital stays and higher mortality. More details are presented in Table 1.  
 182 Table 1: Clinical Demographics and Outcomes in patients with or without severe acute  
 183 kidney injury.

|                                        | SHZJU-ICU<br>Negative<br>(N=5695) | SHZJU-ICU<br>Severe AKI<br>(N=766) | P-<br>valu<br>e | MIMIC<br>Negative<br>(N=33879) | MIMIC<br>Severe AKI<br>(N=2811) | P-<br>value | AmsterdamUMC<br>Negative<br>(N=13661) | AmsterdamUMC<br>severe AKI<br>(N=1680) | P-<br>value |
|----------------------------------------|-----------------------------------|------------------------------------|-----------------|--------------------------------|---------------------------------|-------------|---------------------------------------|----------------------------------------|-------------|
| Age, median [IQR]                      | 60.5<br>[48.8-70.1]               | 62.1<br>[50.1-72.5]                | 0.00<br>4       | 62.0<br>[45.0-76.0]            | 64.0<br>[52.0-76.0]             | <0.001      | 64.5<br>[54.5,74.5]                   | 64.3<br>[52.5,78.5]                    | 0.04        |
| Gender, male (%)                       | 3561 (64.9)                       | 438 (59.8)                         | 0.00<br>7       | 18976 (56.0)                   | 1524 (54.2)                     | 0.06        | 8920 (65.3)                           | 1054 (63.9)                            | 0.03        |
| Race                                   |                                   |                                    |                 |                                |                                 |             | /                                     | /                                      | /           |
| White                                  | 3 (0.05)                          | 1 (0.1)                            | 1               | 23796 (70.2)                   | 2005 (71.3)                     | 0.23        | /                                     | /                                      | /           |
| Black                                  | 1 (0.02)                          | 0                                  | 1               | 2455 (7.2)                     | 199 (7.1)                       | 0.45        | /                                     | /                                      | /           |
| Asian                                  | 5691(99.9)                        | 764 (99.7)                         | 1               | 918 (2.7)                      | 70 (2.5)                        | 0.54        | /                                     | /                                      | /           |
| Other                                  | 0                                 | 1 (0.1)                            | 1               | 6710 (19.8)                    | 537 (19.1)                      | 0.34        | /                                     | /                                      | /           |
| Admission Scr<br>(mg/dL), mean<br>(sd) | 0.9 (0.34)                        | 1.0 (0.40)                         | <0.0<br>01      | 1.1 (0.41)                     | 1.1 (0.50)                      | 0.04        | 1.2 (0.35)                            | 1.1 (0.38)                             | <0.00<br>1  |
| Admission BUN<br>(mg/dL), mean<br>(sd) | 18 (11)                           | 21 (9)                             | <0.0<br>01      | 17 (12)                        | 23 (12)                         | <0.001      | 18 (13)                               | 23 (10)                                | <0.00<br>1  |
| Cancer, n (%)                          | 644 (11.3)                        | 48 (6.3)                           | <0.0<br>01      | 6652 (19.6)                    | 752 (26.8)                      | <0.001      | /                                     | /                                      | /           |
| Cirrhosis, n (%)                       | 43 (0.8)                          | 6 (0.8)                            | 0.89            | 1180 (3.5)                     | 426 (15.2)                      | <0.001      | /                                     | /                                      | /           |
| Cardiopathy, n<br>(%)                  | 231 (4.1)                         | 42 (5.5)                           | 0.08            | 4840 (14.3)                    | 336 (12.0)                      | 0.001       | /                                     | /                                      | /           |
| Diabetes, n (%)                        | 305 (5.4)                         | 63 (8.2)                           | 0.00<br>2       | 7250 (21.4)                    | 789 (28.1)                      | <0.001      | /                                     | /                                      | /           |
| Hypertension, n<br>(%)                 | 889 (15.6)                        | 115 (15.0)                         | 0.70            | 16328 (48.2)                   | 1513 (53.8)                     | <0.001      | /                                     | /                                      | /           |
| Ventilation, n (%)                     | 2569 (45.1)                       | 592 (77.3)                         | <0.0<br>01      | 13009 (38.4)                   | 1503(53.5)                      | <0.001      | 7718(56.5)                            | 1248(74.3)                             | <0.00<br>1  |
| Operation, n (%)                       | 3361 (59.1)                       | 373 (48.7)                         | <0.0<br>01      | 12455 (36.7)                   | 1430 (50.8)                     | <0.001      | /                                     | /                                      | /           |

1  
2  
3  
4  
5  
6  
7  
8

|                        |               |              |              |      |              |              |        |             |              |       |
|------------------------|---------------|--------------|--------------|------|--------------|--------------|--------|-------------|--------------|-------|
| <b>ICU</b>             | <b>Hours,</b> | 50.8         | 164.4        | <0.0 | 51.0         | 103.4        | <0.001 | 24.0        | 142.0        | <0.00 |
| <b>median [IQR]</b>    |               | [23.0-139.5] | [70.3-328.6] | 01   | [28.5-110.3] | [50.1-261.3] |        | [19.8,63.5] | [45.4,394.2] | 1     |
| <b>Survived, n (%)</b> |               | 4997 (87.7)  | 380 (49.6)   | <0.0 | 25648 (75.7) | 1356 (48.2)  | <0.001 | 10942(80.1) | 1033 (61.5)  | <0.00 |
|                        |               |              |              | 01   |              |              |        |             |              | 1     |

9  
10  
11  
12  
13  
14  
15  
16  
17  
18  
19  
20  
21  
22  
23  
24  
25  
26  
27  
28  
29  
30  
31  
32  
33  
34  
35  
36  
37  
38  
39  
40  
41  
42  
43  
44  
45  
46  
47  
48  
49

184 *SHZJU-ICU*: The general ICU database of the second affiliated hospital of Zhejiang university  
185 school of medicine; *MIMIC*: Medical Information Mart for Intensive Care; *IQR*: Inter-Quartile  
186 Range; *ICU*: Intensive Care Unit; *AKI*: Acute Kidney Injury. *Scr*: serum creatinine; *BUN*: blood  
187 urea nitrogen.

188 There were significant differences in the important parameters of the variables among the different  
189 models (see Figure S1). However, the trend of the creatinine level in the past week was still an important  
190 variable, followed by urine volume, blood urea nitrogen level, temperature, and length of ICU stay. The  
191 cut-off value used to distinguish between a negative and positive prediction was determined by the K-S  
192 curve, with value of 0.423 (see Figure S2). The GBDT model had the best prediction effect in the test  
193 set, followed by XGBoost and LightGBoost. In the two central internal validation sets, the two best-  
194 performing machine learning algorithms with great AUROC are LightGBoost (*SHZJU-ICU* of 83.2%,  
195 *MIMIC* of 86.0%) and XGBoost (*SHZJU-ICU* 85.9%, *MIMIC* 85.6%), as detailed in Figure 2. Overall,  
196 the sensitivity (*SHZJU-ICU* 0.84, *MIMIC* 0.83) and the negative predictive value (*SHZJU-ICU* 0.90,  
197 *MIMIC* 0.90) of the predictive model were high, but the specificity was general (*SHZJU-ICU* 0.79,  
198 *MIMIC* 0.75), as shown in Table 2. In the external validation based on AmsterdamUMC database, the  
199 overall model validation effect results were satisfactory, and XGBoost had the best performance, with  
200 an AUROC of 0.84, as shown in Figure 2 and Table 2. We built a visual prediction interface based on  
201 the prediction model (supplementation file Figure S3).

202

203 Table 2: Model validation results by three databases with machine learning algorithm

| <b>Model</b>                                       | <b>AUROC</b> | <b>Accuracy</b> | <b>Sensitivity</b> | <b>Specificity</b> | <b>PPV</b> | <b>NPV</b> | <b>F1</b> |
|----------------------------------------------------|--------------|-----------------|--------------------|--------------------|------------|------------|-----------|
| <b>Internal validation with SHZJU-ICU database</b> |              |                 |                    |                    |            |            |           |
| <b>Logistic regression</b>                         | 0.748        | 0.662           | 0.834              | 0.576              | 0.496      | 0.874      | 0.622     |
| <b>LightGBoost</b>                                 | 0.832        | 0.741           | 0.839              | 0.692              | 0.576      | 0.896      | 0.683     |

50  
51  
52  
53  
54  
55  
56  
57  
58  
59  
60

10

|                                                       |              |       |       |       |       |       |       |
|-------------------------------------------------------|--------------|-------|-------|-------|-------|-------|-------|
| <b>GBDT</b>                                           | 0.845        | 0.765 | 0.843 | 0.725 | 0.606 | 0.902 | 0.705 |
| <b>AdaBoost</b>                                       | 0.806        | 0.721 | 0.824 | 0.67  | 0.555 | 0.884 | 0.663 |
| <b>Random Forest</b>                                  | 0.821        | 0.763 | 0.71  | 0.789 | 0.627 | 0.845 | 0.666 |
| <b>XGBoost</b>                                        | <b>0.859</b> | 0.779 | 0.81  | 0.763 | 0.631 | 0.889 | 0.709 |
| <b>Internal validation with MIMIC database</b>        |              |       |       |       |       |       |       |
| <b>Logistic regression</b>                            | 0.733        | 0.695 | 0.643 | 0.72  | 0.535 | 0.801 | 0.584 |
| <b>LightGBost</b>                                     | <b>0.86</b>  | 0.768 | 0.822 | 0.741 | 0.613 | 0.893 | 0.702 |
| <b>GBDT</b>                                           | 0.846        | 0.765 | 0.786 | 0.755 | 0.616 | 0.876 | 0.691 |
| <b>AdaBoost</b>                                       | 0.837        | 0.732 | 0.831 | 0.683 | 0.567 | 0.89  | 0.674 |
| <b>Random Forest</b>                                  | 0.832        | 0.738 | 0.791 | 0.712 | 0.578 | 0.872 | 0.668 |
| <b>XGBoost</b>                                        | 0.856        | 0.758 | 0.833 | 0.721 | 0.598 | 0.895 | 0.695 |
| <b>External validation with AmsterdamUMC database</b> |              |       |       |       |       |       |       |
| <b>Logistic regression</b>                            | 0.704        | 0.767 | 0.516 | 0.893 | 0.706 | 0.787 | 0.596 |
| <b>LightGBost</b>                                     | 0.859        | 0.763 | 0.827 | 0.731 | 0.606 | 0.894 | 0.7   |
| <b>GBDT</b>                                           | 0.861        | 0.764 | 0.84  | 0.727 | 0.606 | 0.901 | 0.704 |
| <b>AdaBoost</b>                                       | 0.85         | 0.755 | 0.813 | 0.726 | 0.597 | 0.886 | 0.689 |
| <b>Random Forest</b>                                  | 0.82         | 0.743 | 0.77  | 0.729 | 0.587 | 0.864 | 0.666 |
| <b>XGBoost</b>                                        | <b>0.865</b> | 0.75  | 0.873 | 0.688 | 0.584 | 0.916 | 0.7   |
| <b>Prospective validation with SHZJU-ICU</b>          |              |       |       |       |       |       |       |
| <b>Logistic regression</b>                            | 0.758        | 0.772 | 0.648 | 0.834 | 0.662 | 0.826 | 0.655 |
| <b>LightGBost</b>                                     | 0.819        | 0.796 | 0.596 | 0.895 | 0.74  | 0.816 | 0.66  |
| <b>GBDT</b>                                           | 0.827        | 0.781 | 0.706 | 0.818 | 0.66  | 0.848 | 0.683 |
| <b>AdaBoost</b>                                       | 0.808        | 0.766 | 0.686 | 0.805 | 0.638 | 0.837 | 0.661 |
| <b>Random Forest</b>                                  | 0.804        | 0.755 | 0.715 | 0.775 | 0.613 | 0.845 | 0.66  |
| <b>XGBoost</b>                                        | <b>0.841</b> | 0.779 | 0.724 | 0.807 | 0.652 | 0.854 | 0.686 |

204 AUROC: Area Under Receiver Operating Characteristic; PPV: Positive Predictive Value; NPV:  
 205 Negative Predictive Value; SHZJU-ICU: The general ICU database of the second affiliated  
 206 hospital of Zhejiang university school of medicine; MIMIC: Medical Information Mart for  
 207 Intensive Care; GBDT: Gradient Boosted Decision Tree.

208

209 According to the inclusion and exclusion criteria, we delete 267 patients among 94 patients with  
 210 creatinine baseline more than 3.0 mg/dL at admission, 39 patients met severe AKI diagnosis within 24  
 211 hours, and 26 patients who used RRT within 48 hours after admission, 108 patients hospitalized in the  
 212 ICU for fewer than 48 hours. A total of 2532 patients were admitted to our centre for prospective  
 213 validation, and the prediction model made 16858 times predictions. In the prospective cohort, there was  
 214 no significant difference in age, gender, baseline creatinine and urea nitrogen, and complications. The

1  
2  
3  
4 215 proportion of mechanical ventilation and the ICU stay time in AKI patients were longer with higher  
5  
6 216 mortality. Above all, there was no significant difference between the prospective and the retrospective  
7  
8  
9 217 cohort. More detail sees in supplementation file Table S2. In the end, 358 positive results were predicted,  
10  
11 218 and the rest were negative results. There are 344 patients with severe AKI were diagnosed and the  
12  
13  
14 219 prediction accuracy was 83.5%. The model with the highest area under the curve was XGBoost, 0.84  
15  
16  
17 220 with the best sensitivity of 0.72, the specificity of 0.80. The results of the prospective study are similar  
18  
19 221 to those of the external validation of the model, and are relatively stable. More detail is presented in  
20  
21  
22 222 Figure 3 and Table 2.  
23  
24  
25 223

#### 27 224 **Discussion:**

29  
30 225 In this study, we built predictive models by machine learning to predict the incidence of severe AKI  
31  
32 226 with three databases in different regions and in the next 48 hours. After internal and external validation,  
33  
34  
35 227 prospective validation over one year was carried out to verify the model effects. The three databases  
36  
37  
38 228 come from three countries that are in Asia, Europe, and North America, which proves that the model is  
39  
40 229 universal to some extent.

41  
42  
43 230 Despite the huge amount of data, many databases are still not suitable for prospective research  
44  
45 231 because they are not updated promptly. Tomasev, N and colleagues have provided research on AKI  
46  
47  
48 232 prediction models with a large amount of data[10]. The study covered 703782 adult patients with 6 billion  
49  
50  
51 233 individual items, including 620000 elements. In this study, a depth neural network model was used for  
52  
53 234 real-time prediction. A total of 55.8% of severe AKI patients were predicted within the first 48 hours,  
54  
55  
56 235 although each accurate prediction was accompanied by two mispredictions[10]. This study provided a  
57  
58  
59 236 new scheme for real-time prediction and indicated that we should prospectively evaluate and  
60

1  
2  
3  
4 237 independently validate models to explore their effectiveness. In a prospective study, Flechet, M et al  
5  
6 238 compared an AKI prediction model with clinicians in 252 patients and found that the clinical effect of  
7  
8  
9 239 the random forest model for predicting AKI-II/III was equivalent to that of clinicians. Our prediction  
10  
11 240 model graphical visualization of the model was installed in the centre's database for better usage. In  
12  
13  
14 241 addition, our database is updated daily to achieve daily predictions and present the results to researchers.  
15  
16  
17 242 In the prospective validation of our study, the stability of the prediction model confirmed its promise,  
18  
19 243 which provides a basis for future research.

20  
21  
22 244 There are many studies of artificial intelligence for predicting the occurrence of AKI, but most of them  
23  
24 245 are single-centre studies, and the extrapolation effect has been controversial. In 2016, Koyner, J, and his  
25  
26  
27 246 colleague published the first study of an AKI prediction model based on multi-centre data. In all 202961  
28  
29  
30 247 patients, 17541 (8.6%) had AKI, 4251 (3.5%) had AKI-II, and 1242 (0.6%) had AKI-III. A multivariate  
31  
32 248 logistic regression model was used to predict AKI in this study with an AUROC of 0.74 (95% CI=0.74).  
33  
34  
35 249 With the classification of AKI, the AUROC of the prediction model gradually increased to 0.84[8].  
36  
37  
38 250 Subsequently, the study team used a new machine learning algorithm, to build a more accurate model to  
39  
40 251 predict the occurrence of AKI-II, with an AUROC of 0.9 within 24 hours and 0.87 within 48 hours[19].  
41  
42  
43 252 Recently, the research team included data from two other centres, namely, LUMC (N=200613) and NUS  
44  
45 253 (N=246895), to externally validate the AKI-II prediction model with AUROCs reaching 0.85 to 0.86,  
46  
47  
48 254 suggesting that the artificial intelligence model has stable predictive ability[12]. This series of studies  
49  
50  
51 255 included many data points, suggesting the feasibility of artificial intelligence in the diagnosis of AKI,  
52  
53 256 but the proportion of positive patients (3.5%) and ICU patients (30%) was too low to properly predict  
54  
55  
56 257 AKI. Our research is similar to the above. The SAHZJU-ICU database is a single-centre database  
57  
58 258 representing south-eastern China, and the MIMIC database is a well-known open ICU database in the  
59  
60

1  
2  
3  
4 259 United States. The AmsterdamUMC database is a public database located in Europe. The population  
5  
6 260 structure and diseases in the three databases are complete but different in the distribution of complications  
7  
8  
9 261 and race. Therefore, it provides a prediction model with unparalleled stability compared with other  
10  
11 262 studies.

12  
13  
14 263

15  
16  
17 264 **Limitations:**

18  
19 265 This retrospective multi-centre study was unable to carry out more clinical feature mining and  
20  
21  
22 266 comparison because of different data structures. The differences between the three databases partly  
23  
24  
25 267 reflect some demographic differences between Europe, the United States and China, resulting in a decline  
26  
27  
28 268 in the accuracy of the prediction model. There are some differences in the number of patients included  
29  
30  
31 269 in the three databases, which may affect the choice of variables. As a result of the study design, we  
32  
33  
34 270 deleted patients with ICU hospitalization of less than 48 hours, which may result in the exclusion of most  
35  
36  
37 271 relatively mild patients and may reduce false positives. Second, in the prospective data study in 2020,  
38  
39  
40 272 there may be deviations in the inclusion of patients in the centre, thus affecting the interpretation of the  
41  
42  
43 273 follow-up prospective results. Finally, given the low incidence of severe AKI and the great difference in  
44  
45  
46 274 the proportion of positive and negative samples, the data may be accidental. Our model seems to be  
47  
48  
49 275 superior to diagnostic non-AKI patients rather than AKI because of the proportion of positive data that  
50  
51  
52 276 we include. In the retrospective study, we reduced the proportion of negative data by randomization but  
53  
54  
55 277 retain all data in prospective phase with the sensitivity decreases.

56  
57 278

58  
59 279 **Conclusion:**

60 280 Based on databases of patients of different races from different countries, we constructed stable



1  
2  
3  
4 281 machine learning models to predict the occurrence of AKI in the next 48 hours. Prospective validation  
5  
6 282 through the implementation of an updated local database is an effective exploration of further research.  
7  
8

9 283

10  
11 284 Data Availability Statement:

12  
13  
14 285 The model code can be obtained by email if readers need it, but we cannot guarantee that all the  
15  
16  
17 286 code will be provided. Two public databases can be applied from the official website of their respective  
18  
19 287 databases.  
20

21  
22 288 Ethics approval:

23  
24  
25 289 Our research was approved by the ethics committee of the Second Affiliated Hospital of Zhejiang  
26  
27 290 University School of Medicine.  
28

29  
30 291 Competing interests for authors:

31  
32 292 The authors declare that they have no competing interests.  
33  
34

35 293

36  
37 294 **Reference:**

38  
39  
40 295 1. Ronco, C.; Bellomo, R.; Kellum, J.A. Acute kidney injury. *The Lancet* **2019**, *394*, 1949-  
41  
42 296 1964, doi:10.1016/s0140-6736(19)32563-2.

43  
44  
45 297 2. Pakula, A.M.; Skinner, R.A. Acute Kidney Injury in the Critically Ill Patient: A Current  
46  
47 298 Review of the Literature. *J Intensive Care Med* **2016**, *31*, 319-324,  
49  
50 299 doi:10.1177/0885066615575699.

51  
52  
53 300 3. Bellomo, R.; Kellum, J.A.; Ronco, C. Acute kidney injury. *The Lancet* **2012**, *380*, 756-  
54  
55 301 766, doi:10.1016/s0140-6736(11)61454-2.

56  
57  
58 302 4. Khwaja, A. KDIGO clinical practice guidelines for acute kidney injury. *Nephron Clin*  
59  
60

- 1  
2  
3  
4 303 *Pract* **2012**, *120*, c179-184, doi:10.1159/000339789.
- 5  
6 304 5. Coelho, S.; Cabral, G.; Lopes, J.A.; Jacinto, A. Renal regeneration after acute kidney  
7  
8  
9 305 injury. *Nephrology (Carlton)* **2018**, *23*, 805-814, doi:10.1111/nep.13256.
- 10  
11 306 6. Wilson, F.P.; Greenberg, J.H. Acute Kidney Injury in Real Time: Prediction, Alerts, and  
12  
13  
14 307 Clinical Decision Support. *Nephron* **2018**, *140*, 116-119, doi:10.1159/000492064.
- 15  
16  
17 308 7. Wu, Y.; Hao, W.; Chen, Y.; Chen, S.; Liu, W.; Yu, F.; Hu, W.; Liang, X. Clinical features,  
18  
19  
20 309 risk factors, and clinical burden of acute kidney injury in older adults. *Ren Fail* **2020**,  
21  
22 310 *42*, 1127-1134, doi:10.1080/0886022X.2020.1843491.
- 23  
24  
25 311 8. Koyner, J.L.; Adhikari, R.; Edelson, D.P.; Churpek, M.M. Development of a Multicenter  
26  
27 312 Ward-Based AKI Prediction Model. *Clin J Am Soc Nephrol* **2016**, *11*, 1935-1943,  
28  
29  
30 313 doi:10.2215/CJN.00280116.
- 31  
32  
33 314 9. Low, S.; Vathsala, A.; Murali, T.M.; Pang, L.; MacLaren, G.; Ng, W.Y.; Haroon, S.;  
34  
35 315 Mukhopadhyay, A.; Lim, S.L.; Tan, B.H., et al. Electronic health records accurately  
36  
37 316 predict renal replacement therapy in acute kidney injury. *BMC Nephrol* **2019**, *20*, 32,  
38  
39  
40 317 doi:10.1186/s12882-019-1206-4.
- 41  
42  
43 318 10. Tomasev, N.; Glorot, X.; Rae, J.W.; Zielinski, M.; Askham, H.; Saraiva, A.; Mottram, A.;  
44  
45  
46 319 Meyer, C.; Ravuri, S.; Protsyuk, I., et al. A clinically applicable approach to continuous  
47  
48 320 prediction of future acute kidney injury. *Nature* **2019**, *572*, 116-119,  
49  
50  
51 321 doi:10.1038/s41586-019-1390-1.
- 52  
53 322 11. Flechet, M.; Falini, S.; Bonetti, C.; Güiza, F.; Schetz, M.; Van den Berghe, G.; Meyfroidt,  
54  
55  
56 323 G. Machine learning versus physicians' prediction of acute kidney injury in critically ill  
57  
58 324 adults: a prospective evaluation of the AKIpredictor. *Critical Care* **2019**, *23*, 282,

- 1  
2  
3  
4 325 doi:10.1186/s13054-019-2563-x.  
5  
6 326 12. Churpek, M.M.; Carey, K.A.; Edelson, D.P.; Singh, T.; Astor, B.C.; Gilbert, E.R.;  
7  
8  
9 327 Winslow, C.; Shah, N.; Afshar, M.; Koyner, J.L. Internal and External Validation of a  
10  
11 328 Machine Learning Risk Score for Acute Kidney Injury. *JAMA Netw Open* **2020**, *3*,  
12  
13 329 e2012892, doi:10.1001/jamanetworkopen.2020.12892.  
14  
15  
16 330 13. Yuan, Q.; Zhang, H.; Deng, T.; Tang, S.; Yuan, X.; Tang, W.; Xie, Y.; Ge, H.; Wang,  
17  
18 331 X.; Zhou, Q., et al. Role of Artificial Intelligence in Kidney Disease. *Int J Med Sci* **2020**,  
19  
20 332 *17*, 970-984, doi:10.7150/ijms.42078.  
21  
22  
23 333 14. Li, Y.; Xu, J.; Wang, Y.; Zhang, Y.; Jiang, W.; Shen, B.; Ding, X. A novel machine  
24  
25 334 learning algorithm, Bayesian networks model, to predict the high-risk patients with  
26  
27 335 cardiac surgery-associated acute kidney injury. *Clin Cardiol* **2020**, *43*, 752-761,  
28  
29 336 doi:10.1002/clc.23377.  
30  
31  
32 337 15. De Vlieger, G.; Kashani, K.; Meyfroidt, G. Artificial intelligence to guide management  
33  
34 338 of acute kidney injury in the ICU: a narrative review. *Curr Opin Crit Care* **2020**, *26*, 563-  
35  
36 339 573, doi:10.1097/MCC.0000000000000775.  
37  
38  
39 340 16. James, M.T.; Pannu, N.; Hemmelgarn, B.R.; Austin, P.C.; Tan, Z.; McArthur, E.; Manns,  
40  
41 341 B.J.; Tonelli, M.; Wald, R.; Quinn, R.R., et al. Derivation and External Validation of  
42  
43 342 Prediction Models for Advanced Chronic Kidney Disease Following Acute Kidney Injury.  
44  
45 343 *JAMA* **2017**, *318*, 1787-1797, doi:10.1001/jama.2017.16326.  
46  
47  
48 344 17. Johnson, A.E.; Pollard, T.J.; Shen, L.; Lehman, L.W.; Feng, M.; Ghassemi, M.; Moody,  
49  
50 345 B.; Szolovits, P.A.-O.; Celi, L.A.; Mark, R.A.-O. MIMIC-III, a freely accessible critical  
51  
52 346 care database.  
53  
54  
55  
56  
57  
58  
59  
60

- 1  
2  
3  
4 347 18. Thorat, P.J.; Peppink, J.M.; Driessen, R.H.; Sijbrands, E.J.G.; Kompanje, E.J.O.;  
5  
6 348 Kaplan, L.; Bailey, H.; Kesecioglu, J.; Cecconi, M.; Churpek, M., et al. Sharing ICU  
7  
8  
9 349 Patient Data Responsibly Under the Society of Critical Care Medicine/European  
10  
11 350 Society of Intensive Care Medicine Joint Data Science Collaboration: The Amsterdam  
12  
13  
14 351 University Medical Centers Database (AmsterdamUMCdb) Example. *Crit Care Med*  
15  
16  
17 352 **2021**, 10.1097/CCM.0000000000004916, doi:10.1097/CCM.0000000000004916.  
18  
19 353 19. Koyner, J.L.; Carey, K.A.; Edelson, D.P.; Churpek, M.M. The Development of a  
20  
21  
22 354 Machine Learning Inpatient Acute Kidney Injury Prediction Model. *Crit Care Med* **2018**,  
23  
24  
25 355 *46*, 1070-1077, doi:10.1097/CCM.00000000000003123.  
26  
27  
28  
29

30 357 **Footnotes**

31  
32 358 Contributions: Conceptualization, QL and MH; Methodology, YX; Software, YX; Validation, YZ, and  
33  
34  
35 359 YX.; Formal Analysis, JC and XC; Resources, MH; Data Curation, QL; Writing – Original Draft  
36  
37  
38 360 Preparation, QL; Writing – Review & Editing, MH; Visualization, YX; Supervision, YZ and QL; Project  
39  
40  
41 361 Administration, QL;

42  
43 362 **Funding:** This research received no specific grant from any funding agency in the public, commercial  
44  
45  
46 363 or not-for-profit sectors.

47  
48 364 Conflicts of Interest: Not Applicable.

49  
50  
51 365 Patient and public involvement Patients and/or the public were not involved in the design, or conduct, or  
52  
53  
54 366 reporting, or dissemination plans of this research.

55  
56 367 Provenance and peer review Not commissioned; externally peer reviewed.

57  
58 368 Acknowledgements: Thank my colleagues in general ICU for cooperating with us in our prospective  
59  
60

1  
2  
3  
4 369 study. Thanks to two public databases namely MIMIC and AmsterdamUMC for providing important  
5  
6 370 data. Thanks for all patient advisers.  
7  
8

9 371

10  
11 372 **Supplemental Figure:**

12  
13  
14 373 File name: **Figure S1.tif**

15  
16  
17 374 Title and Description of data: The variable importance parameter histogram of early diagnosis prediction  
18  
19 375 models of severe AKI uses a multiple logistic regression algorithm and five machine learning algorithms.  
20  
21

22 376 File name: **Figure S2.tif**

23  
24  
25 377 Title and Description of data: The K-S curve used to determine the cut-off value of positive and negative  
26  
27 378 diagnosis of early diagnosis prediction models of severe AKI.  
28  
29

30 379 File name: **Table S1.docx**

31  
32 380 Title and of Description data: Missing data between three databases in the study and values included in  
33  
34  
35 381 the model.  
36  
37

38 382 File name: **Table S2.docx**

39  
40 383 Title and of Description data: Clinical Demographics and Outcomes of SHZJU-ICU patients in model  
41  
42  
43 384 building set and prospective validation.  
44  
45

46 385 File name: **Table S3.docx**

47  
48 386 Title of data: TRIPOD Checklist of Prediction Model Development and Validation

49  
50 387 Description of data: Writing norms of this type of research.  
51  
52

53 388

54  
55  
56 389 **Figure Legend:**

57  
58 390 Figure 1: The research flow chart. The data collection time interval of the study was 7 days before  
59  
60

1  
2  
3  
4 391 diagnosis and the prediction interval was 48 hours. The early prediction model of AKI diagnosis was  
5  
6 392 constructed and verified by our database and the MIMIC database and incorporated into the  
7  
8  
9 393 AmsterdamUMC database for external validation. We carried out a one-year prospective validation  
10  
11  
12 394 through the database of the centre.

13  
14 395 Figure 2: The AUROC curve of the internal validation set of the SHZJU-ICU database and the MIMIC  
15  
16  
17 396 database.

18  
19 397 Figure 3: The AUROC curve of the external validation set of the AmsterdamUMC database for 3A and  
20  
21  
22 398 the prospective validation in our center for 3B.  
23  
24  
25  
26  
27  
28  
29  
30  
31  
32  
33  
34  
35  
36  
37  
38  
39  
40  
41  
42  
43  
44  
45  
46  
47  
48  
49  
50  
51  
52  
53  
54  
55  
56  
57  
58  
59  
60

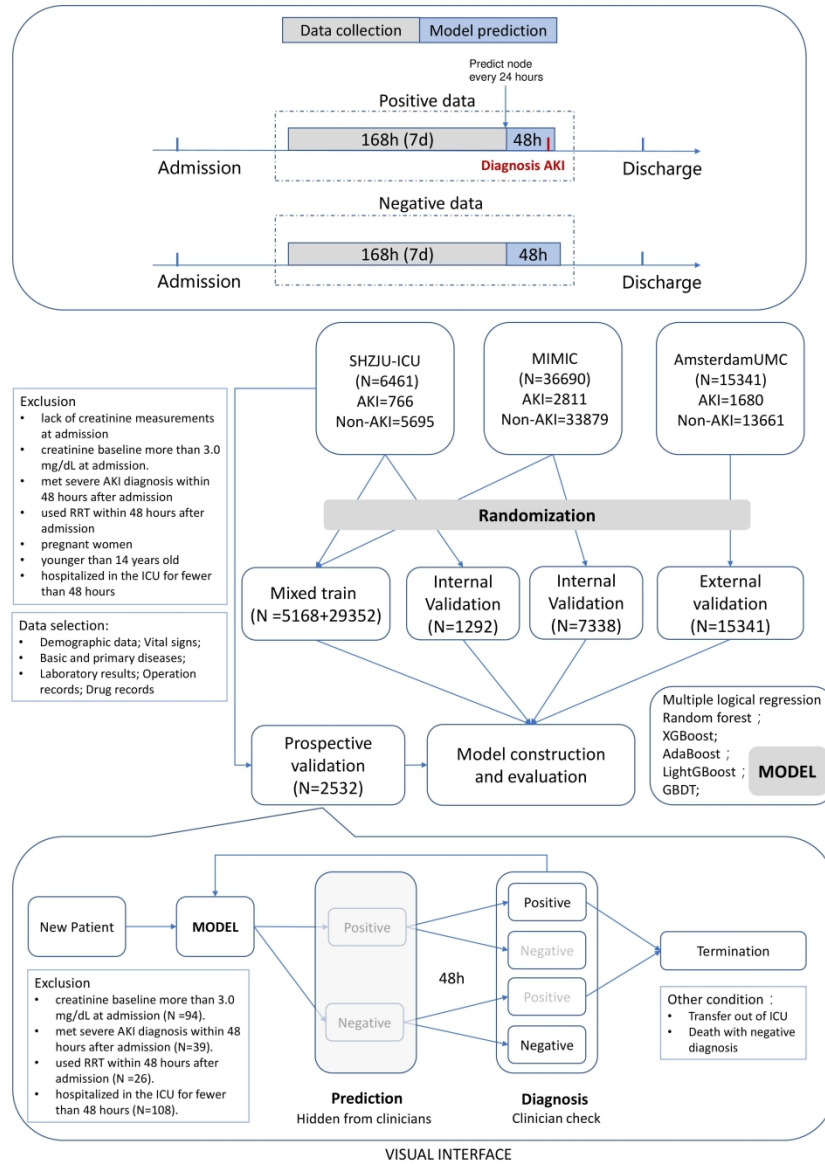

338x451mm (300 x 300 DPI)

1  
2  
3  
4  
5  
6  
7  
8  
9  
10  
11  
12  
13  
14  
15  
16  
17  
18  
19  
20  
21  
22  
23  
24  
25  
26  
27  
28  
29  
30  
31  
32  
33  
34  
35  
36  
37  
38  
39  
40  
41  
42  
43  
44  
45  
46  
47  
48  
49  
50  
51  
52  
53  
54  
55  
56  
57  
58  
59  
60

Internal validation set ROC curves

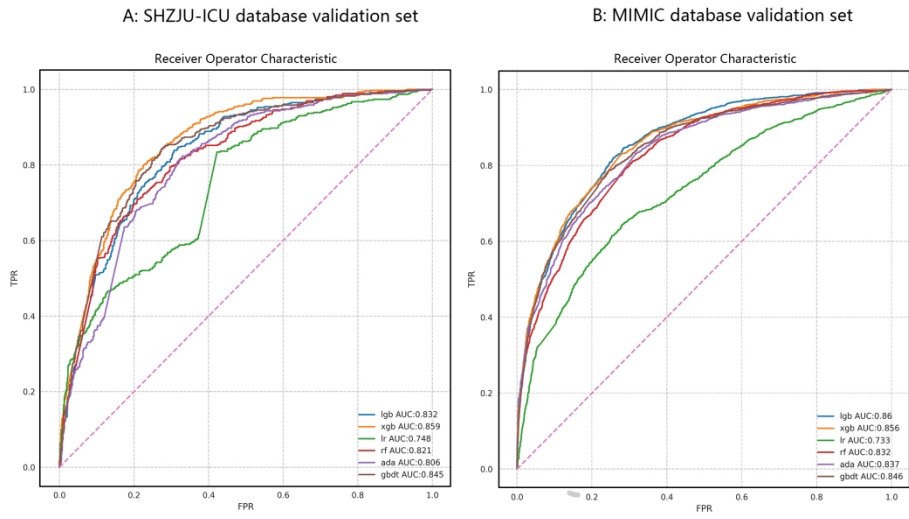



External and prospective validation set ROC curves

A: AmsterdamUMC database external validation set      B: SHZJU-ICU database prospective validation set



**Supplemental Figure:**File name: **Figure S1.tif**

Title and Description of data: The variable importance parameter histogram of early diagnosis prediction models of severe AKI uses a multiple logistic regression algorithm and five machine learning algorithms.

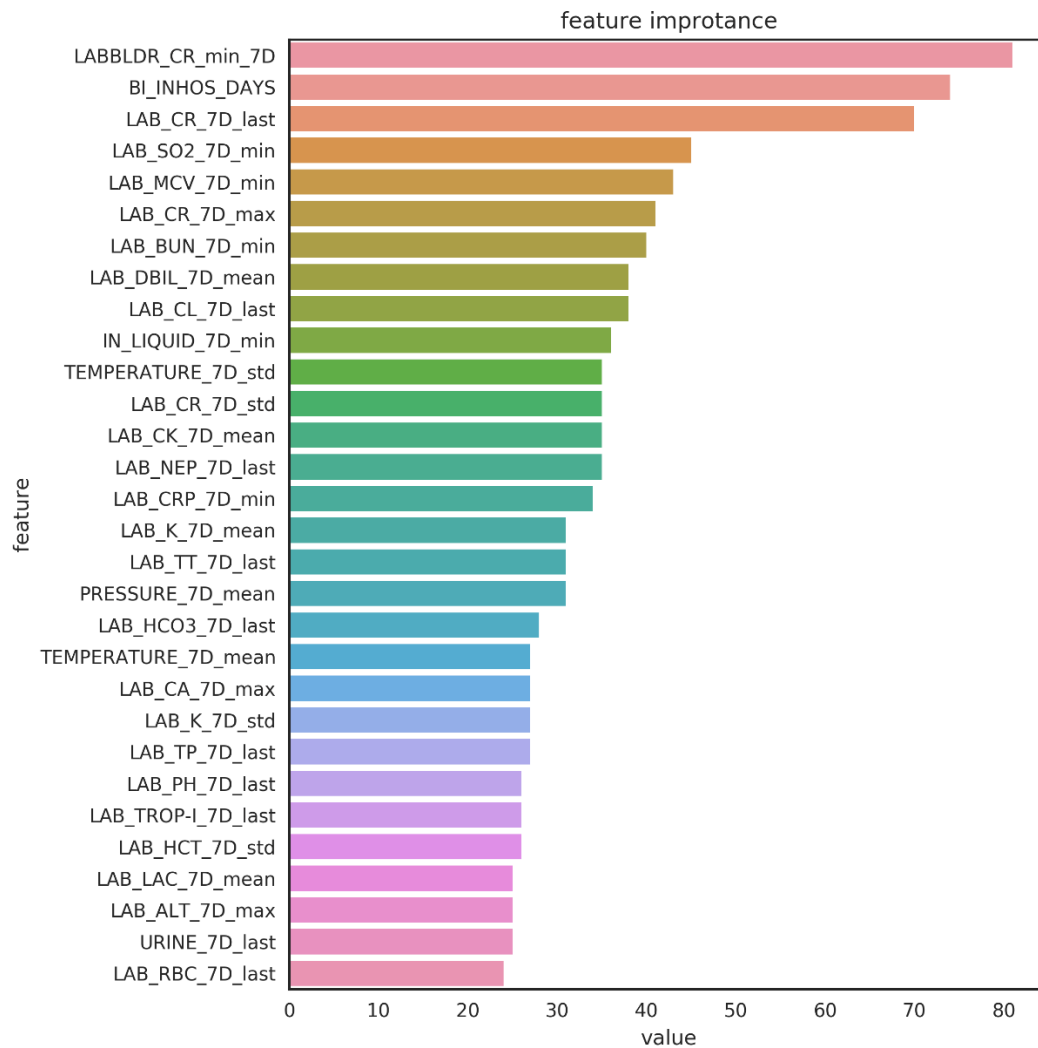File name: **Figure S2.tif**

Title and Description of data: The K-S curve used to determine the cut-off value of positive and negative diagnosis of early diagnosis prediction models of severe AKI.

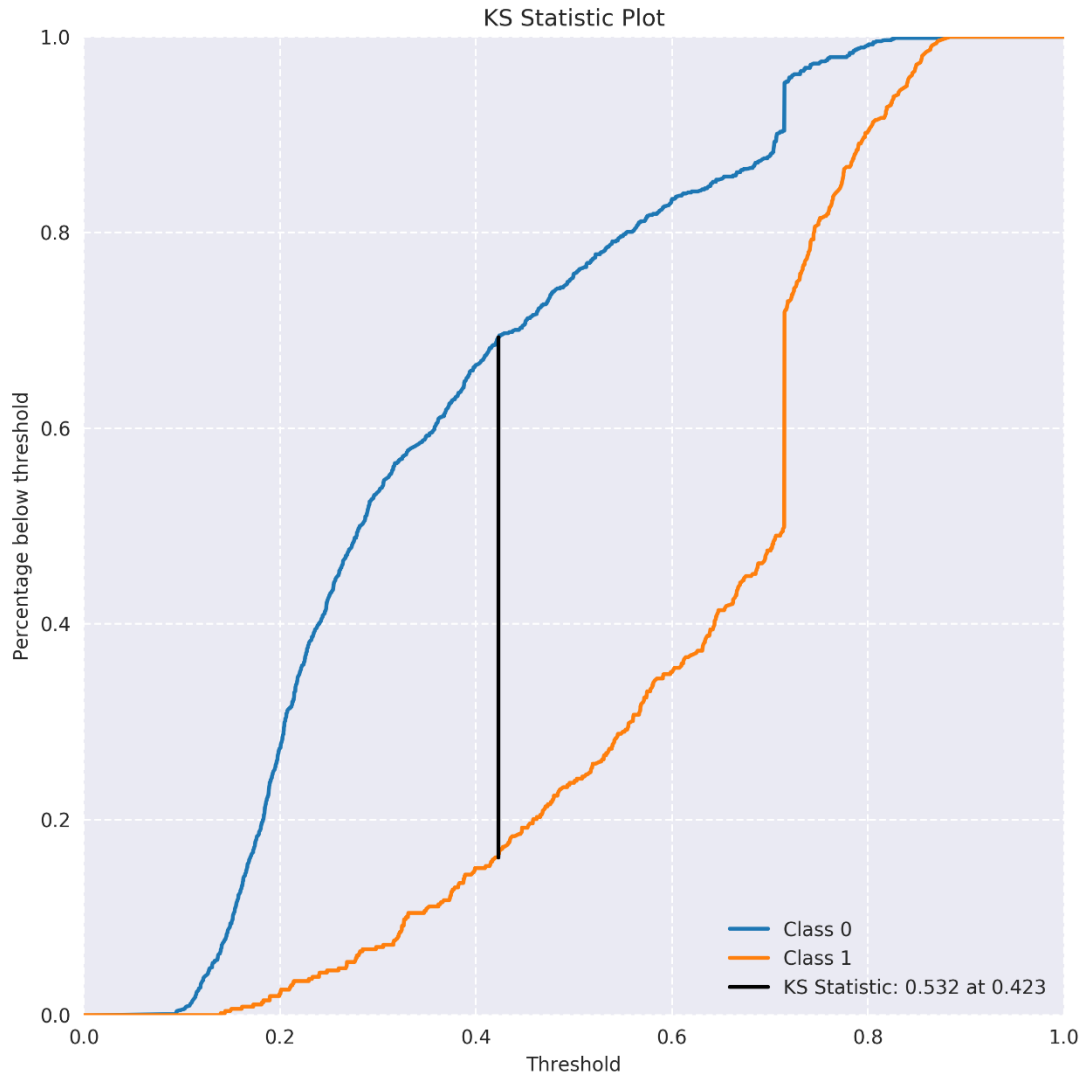

For peer review only

File name: **Table S1.docx**

Title and of Description data: Missing data between three databases in the study and values included in the model.

|                           | SHZJU-ICU | MIMIC | AmsterdamUMC | Including in Model |
|---------------------------|-----------|-------|--------------|--------------------|
| <b>Age</b>                | √         | √     | √            | √                  |
| <b>Gender</b>             | √         | √     | √            | √                  |
| <b>Race</b>               | √         | √     | ×            | ×                  |
| <b>Primary disease</b>    | √         | √     | ×            | ×                  |
| <b>Comorbidity</b>        | √         | √     | ×            | ×                  |
| <b>Ventilation</b>        | √         | √     | √            | √                  |
| <b>Operation</b>          | √         | √     | ×            | ×                  |
| <b>ICU hours</b>          | √         | √     | √            | √                  |
| <b>Survived</b>           | √         | √     | √            | √                  |
| <b>Vital sign</b>         |           |       |              |                    |
| <b>Temperature</b>        | √         | √     | √            | √                  |
| <b>Systolic pressure</b>  | √         | √     | √            | √                  |
| <b>Diastolic pressure</b> | √         | √     | √            | √                  |
| <b>Respiratory rate</b>   | √         | √     | √            | √                  |
| <b>Heart rate</b>         | √         | √     | √            | √                  |
| <b>Oxygen saturation</b>  | √         | √     | √            | √                  |
| <b>Urine</b>              | √         | √     | √            | √                  |
| <b>GCS score</b>          | √         | ×     | ×            | ×                  |
| <b>Laboratory results</b> |           |       |              |                    |
| <b>Scr</b>                | √         | √     | √            | √                  |
| <b>BUN</b>                | √         | √     | √            | √                  |
| <b>RBC</b>                | √         | √     | √            | √                  |
| <b>MCV</b>                | √         | √     | √            | √                  |
| <b>Hb</b>                 | √         | √     | √            | √                  |
| <b>WBC</b>                | √         | √     | √            | √                  |
| <b>NEUT</b>               | √         | √     | √            | √                  |
| <b>PLT</b>                | √         | √     | √            | √                  |
| <b>HCV</b>                | √         | √     | ×            | ×                  |
| <b>TBLB</b>               | √         | √     | √            | √                  |
| <b>DBLB</b>               | √         | √     | √            | √                  |
| <b>IBLB</b>               | √         | √     | √            | √                  |
| <b>CRP</b>                | √         | √     | √            | √                  |
| <b>PCT</b>                | √         | ×     | ×            | ×                  |
| <b>Serum kalium</b>       | √         | √     | √            | √                  |
| <b>Serum natrium</b>      | √         | √     | √            | √                  |
| <b>Serum chlorine</b>     | √         | √     | √            | √                  |

|                   |   |   |   |   |
|-------------------|---|---|---|---|
| PT                | √ | √ | √ | √ |
| APTT              | √ | √ | √ | √ |
| INR               | √ | √ | √ | √ |
| CK                | √ | √ | √ | √ |
| LDH               | √ | √ | √ | √ |
| Troponin          | √ | √ | √ | √ |
| Blood glucose     | √ | √ | √ | √ |
| PH                | √ | √ | √ | √ |
| Lactic acid       | √ | √ | √ | √ |
| Anion gap         | √ | √ | √ | √ |
| ABC               | √ | √ | √ | √ |
| SBC               | √ | √ | √ | √ |
| PaCO <sub>2</sub> | √ | √ | √ | √ |
| PaO <sub>2</sub>  | √ | √ | √ | √ |

SHZJU-ICU: The general ICU database of the second affiliated hospital of Zhejiang university school of medicine; MIMIC: Medical Information Mart for Intensive Care; APTT: Activated partial thromboplastin time; INR: International normalized ratio; LDH: Lactate dehydrogenase; PaCO<sub>2</sub>: Partial pressure of carbon dioxide; PaO<sub>2</sub>: Partial pressure of oxygen; MCV: Mean corpuscular volume; PH: Potential of hydrogen; WBC: White blood cell count; NEUT: Proportion of neutrophils; CK: Creatine kinase; Scr: Serum Creatinine; BUN: Blood urea nitrogen; RBC: Red blood cell count; Hb: Hemoglobin; PT: Prothrombin time; TBLB: Total bilirubin; DBLB: Direct bilirubin; IBLB: Indirect bilirubin; CRP: C-reactive protein; HCV: Hematocrit value; PCT: Procalcitonin; ABC: Actual Bicarbonate Radical; SBC: Standard Bicarbonate Radical; PLT: Platelet count

File name: **Table S2.docx**

Title and of Description data: Clinical Demographics and Outcomes of SHZJU-ICU patients in model

building set and prospective validation.

|                                         | SHZJU-ICU<br>Negative<br>(N=5695) | SHZJU-ICU<br>Severe AKI<br>(N=766) | P-value | SHZJU-ICU<br>Prospective<br>Negative<br>(N=2188) | SHZJU-ICU<br>Prospective<br>Positive<br>(N=344) | P-value |
|-----------------------------------------|-----------------------------------|------------------------------------|---------|--------------------------------------------------|-------------------------------------------------|---------|
| <b>Age, median [IQR]</b>                | 60.5<br>[48.8-70.1]               | 62.1<br>[50.1-72.5]                | 0.004   | 61.3<br>[47.5-73.4]                              | 62.1<br>[51.2-70.5]                             | 0.03    |
| <b>Gender, male (%)</b>                 | 3561 (64.9)                       | 438 (59.8)                         | 0.007   | 1365 (62.4)                                      | 207 (60.2)                                      | 0.438   |
| <b>Race</b>                             |                                   |                                    |         |                                                  |                                                 |         |
| <b>White</b>                            | 3 (0.05)                          | 1 (0.1)                            | 1       | 2 (0.001)                                        | 0                                               | 1       |
| <b>Black</b>                            | 1 (0.02)                          | 0                                  | 1       | 0                                                | 0                                               | 1       |
| <b>Asian</b>                            | 5691(99.9)                        | 764 (99.7)                         | 1       | 2185 (99.9)                                      | 344(100)                                        | 1       |
| <b>Other</b>                            | 0                                 | 1 (0.1)                            | 1       | 1 (0.001)                                        | 0                                               | 1       |
| <b>Admission Scr (mg/dL), mean (sd)</b> | 0.9 (0.34)                        | 1.0 (0.40)                         | <0.001  | 0.8 (0.32)                                       | 0.9 (0.35)                                      | <0.001  |
| <b>Admission BUN (mg/dL), mean (sd)</b> | 18 (11)                           | 21 (9)                             | <0.001  | 17 (11)                                          | 20 (10)                                         | 0.007   |
| <b>Cancer, n (%)</b>                    | 644 (11.3)                        | 48 (6.3)                           | <0.001  | 230 (10.5)                                       | 26 (7.6)                                        | 0.102   |
| <b>Cirrhosis, n (%)</b>                 | 43 (0.8)                          | 6 (0.8)                            | 0.89    | 15 (0.7)                                         | 3 (0.8)                                         | 0.726   |
| <b>Cardiopathy, n (%)</b>               | 231 (4.1)                         | 42 (5.5)                           | 0.08    | 98 (4.5)                                         | 19 (5.7)                                        | 0.403   |
| <b>Diabetes, n (%)</b>                  | 305 (5.4)                         | 63 (8.2)                           | 0.002   | 142 (6.5)                                        | 29 (8.6)                                        | 0.203   |
| <b>Hypertension, n (%)</b>              | 889 (15.6)                        | 115 (15.0)                         | 0.70    | 324(14.8)                                        | 56 (16.4)                                       | 0.466   |
| <b>Ventilation, n (%)</b>               | 2569 (45.1)                       | 592 (77.3)                         | <0.001  | 1102 (50.4)                                      | 239 (69.5)                                      | <0.001  |
| <b>Operation, n (%)</b>                 | 3361 (59.1)                       | 373 (48.7)                         | <0.001  | 1234(56.4)                                       | 160 (46.7)                                      | 0.001   |
| <b>ICU Hours, median [IQR]</b>          | 50.8<br>[23.0-139.5]              | 164.4<br>[70.3-328.6]              | <0.001  | 58.7<br>[34.2-160.4]                             | 145.6<br>[68.5-314.8]                           | <0.001  |
| <b>Survived, n (%)</b>                  | 4997 (87.7)                       | 380 (49.6)                         | <0.001  | 1868 (85.4)                                      | 178 (51.9)                                      | <0.001  |

SHZJU-ICU: The general ICU database of the second affiliated hospital of Zhejiang university school of medicine; MIMIC: Medical Information Mart for Intensive Care; IQR: Inter-Quartile Range; ICU: Intensive Care Unit; AKI: Acute Kidney Injury. Scr: serum creatinine; BUN: blood urea nitrogen.

File name: **Table S3.docx**

Title of data: TRIPOD Checklist of Prediction Model Development and Validation

Description of data: Writing norms of this type of research.

| 1Section/Topic               | Checklist Item |     | Page                                                                                                                                                                                                        |
|------------------------------|----------------|-----|-------------------------------------------------------------------------------------------------------------------------------------------------------------------------------------------------------------|
| <b>Title and abstract</b>    |                |     |                                                                                                                                                                                                             |
| Title                        | 1              | Y;V | Identify the study as developing and/or validating a multivariable prediction model, the target population, and the outcome to be predicted.<br>Yes; P1                                                     |
| Abstract                     | 2              | Y;V | Provide a summary of objectives, study design, setting, participants, sample size, predictors, outcome, statistical analysis, results, and conclusions.<br>Yes; P2                                          |
| <b>Introduction</b>          |                |     |                                                                                                                                                                                                             |
| Background and objectives    | 3a             | Y;V | Explain the medical context (including whether diagnostic or prognostic) and rationale for developing or validating the multivariable prediction model, including references to existing models.<br>Yes; P3 |
|                              | 3b             | Y;V | Specify the objectives, including whether the study describes the development or validation of the model or both.<br>Yes; P4, L76-79                                                                        |
| <b>Methods</b>               |                |     |                                                                                                                                                                                                             |
| Source of data               | 4a             | Y;V | Describe the study design or source of data (e.g., randomized trial, cohort, or registry data), separately for the development and validation data sets, if applicable.<br>Yes; P4, L80                     |
|                              | 4b             | Y;V | Specify the key study dates, including start of accrual; end of accrual; and, if applicable, end of follow-up.<br>Yes; P4, L84-86                                                                           |
| Participants                 | 5a             | Y;V | Specify key elements of the study setting (e.g., primary care, secondary care, general population) including number and location of centres.<br>Yes                                                         |
|                              | 5b             | Y;V | Describe eligibility criteria for participants.<br>Yes; P5, L104                                                                                                                                            |
|                              | 5c             | Y;V | Give details of treatments received, if relevant.<br>NA                                                                                                                                                     |
| Outcome                      | 6a             | Y;V | Clearly define the outcome that is predicted by the prediction model, including how and when assessed.<br>Yes; P6, L111                                                                                     |
|                              | 6b             | Y;V | Report any actions to blind assessment of the outcome to be predicted.<br>NA                                                                                                                                |
| Predictors                   | 7a             | Y;V | Clearly define all predictors used in developing or validating the multivariable prediction model, including how and when they were measured.<br>Yes; P6, L116                                              |
|                              | 7b             | Y;V | Report any actions to blind assessment of predictors for the outcome and other predictors.<br>NA                                                                                                            |
| Sample size                  | 8              | Y;V | Explain how the study size was arrived at.<br>NA                                                                                                                                                            |
| Missing data                 | 9              | Y;V | Describe how missing data were handled (e.g., complete-case analysis, single imputation, multiple imputation) with details of any imputation method.<br>Yes; P6, L127                                       |
| Statistical analysis methods | 10a            | D   | Describe how predictors were handled in the analyses.<br>Yes; P6, L116                                                                                                                                      |
|                              | 10b            | D   | Specify type of model, all model-building procedures (including any predictor selection), and method for internal validation.<br>Yes; P6, L119                                                              |
|                              | 10c            | V   | For validation, describe how the predictions were calculated.<br>Yes; P6, L126                                                                                                                              |
|                              | 10d            | Y;V | Specify all measures used to assess model performance and, if relevant, to compare multiple models.<br>Yes; P6, L159                                                                                        |

|                            |    |     |                                                                                                                                                                                                       |                   |
|----------------------------|----|-----|-------------------------------------------------------------------------------------------------------------------------------------------------------------------------------------------------------|-------------------|
|                            | 0e | V   | Describe any model updating (e.g., recalibration) arising from the validation, if done.                                                                                                               | NA                |
| Risk groups                | 11 | P;V | Provide details on how risk groups were created, if done.                                                                                                                                             | Yes; P6, L111     |
| Development vs. validation | 12 | V   | For validation, identify any differences from the development data in setting, eligibility criteria, outcome, and predictors.                                                                         | Yes; P6, L132     |
| <b>Results</b>             |    |     |                                                                                                                                                                                                       |                   |
| Participants               | 3a | P;V | Describe the flow of participants through the study, including the number of participants with and without the outcome and, if applicable, a summary of the follow-up time. A diagram may be helpful. | Yes; Figure 1     |
|                            | 3b | P;V | Describe the characteristics of the participants (basic demographics, clinical features, available predictors), including the number of participants with missing data for predictors and outcome.    | Yes, P8, L168-180 |
|                            | 3c | V   | For validation, show a comparison with the development data of the distribution of important variables (demographics, predictors and outcome).                                                        | Yes, Table2       |
| Model development          | 4a | D   | Specify the number of participants and outcome events in each analysis.                                                                                                                               | Yes, P8, L168     |
|                            | 4b | D   | If done, report the unadjusted association between each candidate predictor and outcome.                                                                                                              | Yes               |
| Model specification        | 5a | D   | Present the full prediction model to allow predictions for individuals (i.e., all regression coefficients, and model intercept or baseline survival at a given time point).                           | Yes.              |
|                            | 5b | D   | Explain how to use the prediction model.                                                                                                                                                              | Yes, P9, L196     |
| Model performance          | 16 | P;V | Report performance measures (with CIs) for the prediction model.                                                                                                                                      | Yes, P9, L190     |
| Model-updating             | 17 | V   | If done, report the results from any model updating (i.e., model specification, model performance).                                                                                                   | NA                |
| <b>Discussion</b>          |    |     |                                                                                                                                                                                                       |                   |
| Limitations                | 18 | P;V | Discuss any limitations of the study (such as nonrepresentative sample, few events per predictor, missing data).                                                                                      | Yes, P12, L236    |
| Interpretation             | 9a | V   | For validation, discuss the results with reference to performance in the development data, and any other validation data.                                                                             | Yes, P11, L217    |
|                            | 9b | P;V | Give an overall interpretation of the results, considering objectives, limitations, results from similar studies, and other relevant evidence.                                                        | Yes, P10 L198     |
| Implications               | 20 | P;V | Discuss the potential clinical use of the model and implications for future research.                                                                                                                 | Yes, P9, L193     |
| <b>Other information</b>   |    |     |                                                                                                                                                                                                       |                   |
| Supplementary information  | 21 | P;V | Provide information about the availability of supplementary resources, such as study protocol, Web calculator, and data sets.                                                                         | Yes               |
| Funding                    | 22 | P;V | Give the source of funding and the role of the funders for the present study.                                                                                                                         | NA                |



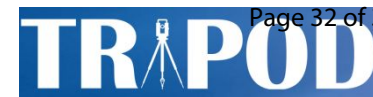

TRIPOD Checklist: Prediction Model Development and Validation

| 1Section/Topic               | Item |     | Checklist Item                                                                                                                                                                                        | Page                            |
|------------------------------|------|-----|-------------------------------------------------------------------------------------------------------------------------------------------------------------------------------------------------------|---------------------------------|
| <b>Title and abstract</b>    |      |     |                                                                                                                                                                                                       |                                 |
| Title                        | 1    | D;V | Identify the study as developing and/or validating a multivariable prediction model, the target population, and the outcome to be predicted.                                                          | Yes; P1                         |
| Abstract                     | 2    | D;V | Provide a summary of objectives, study design, setting, participants, sample size, predictors, outcome, statistical analysis, results, and conclusions.                                               | Yes; P2                         |
| <b>Introduction</b>          |      |     |                                                                                                                                                                                                       |                                 |
| Background and objectives    | 3a   | D;V | Explain the medical context (including whether diagnostic or prognostic) and rationale for developing or validating the multivariable prediction model, including references to existing models.      | Yes; P3                         |
|                              | 3b   | D;V | Specify the objectives, including whether the study describes the development or validation of the model or both.                                                                                     | Yes; P4, L76-79                 |
| <b>Methods</b>               |      |     |                                                                                                                                                                                                       |                                 |
| Source of data               | 4a   | D;V | Describe the study design or source of data (e.g., randomized trial, cohort, or registry data), separately for the development and validation data sets, if applicable.                               | Yes; P4, L83-92                 |
|                              | 4b   | D;V | Specify the key study dates, including start of accrual; end of accrual; and, if applicable, end of follow-up.                                                                                        | Yes; P4, L83-100                |
| Participants                 | 5a   | D;V | Specify key elements of the study setting (e.g., primary care, secondary care, general population) including number and location of centres.                                                          | Yes                             |
|                              | 5b   | D;V | Describe eligibility criteria for participants.                                                                                                                                                       | Yes; P4, L103                   |
|                              | 5c   | D;V | Give details of treatments received, if relevant.                                                                                                                                                     | NA                              |
| Outcome                      | 6a   | D;V | Clearly define the outcome that is predicted by the prediction model, including how and when assessed.                                                                                                | Yes; P6, L111                   |
|                              | 6b   | D;V | Report any actions to blind assessment of the outcome to be predicted.                                                                                                                                | NA                              |
| Predictors                   | 7a   | D;V | Clearly define all predictors used in developing or validating the multivariable prediction model, including how and when they were measured.                                                         | Yes; P6, L116                   |
|                              | 7b   | D;V | Report any actions to blind assessment of predictors for the outcome and other predictors.                                                                                                            | NA                              |
| Sample size                  | 8    | D;V | Explain how the study size was arrived at.                                                                                                                                                            | NA                              |
| Missing data                 | 9    | D;V | Describe how missing data were handled (e.g., complete-case analysis, single imputation, multiple imputation) with details of any imputation method.                                                  | Yes; P6, L127                   |
| Statistical analysis methods | 10a  | D   | Describe how predictors were handled in the analyses.                                                                                                                                                 | Yes; P6, L125                   |
|                              | 10b  | D   | Specify type of model, all model-building procedures (including any predictor selection), and method for internal validation.                                                                         | Yes; P6, L130-138               |
|                              | 10c  | V   | For validation, describe how the predictions were calculated.                                                                                                                                         | Yes; P6, L139                   |
|                              | 10d  | D;V | Specify all measures used to assess model performance and, if relevant, to compare multiple models.                                                                                                   | Yes; P7, L159                   |
|                              | 10e  | V   | Describe any model updating (e.g., recalibration) arising from the validation, if done.                                                                                                               | Yes; P7, L137                   |
| Risk groups                  | 11   | D;V | Provide details on how risk groups were created, if done.                                                                                                                                             | Yes; P6, L111                   |
| Development vs. validation   | 12   | V   | For validation, identify any differences from the development data in setting, eligibility criteria, outcome, and predictors.                                                                         | Yes; P6, L132                   |
| <b>Results</b>               |      |     |                                                                                                                                                                                                       |                                 |
| Participants                 | 13a  | D;V | Describe the flow of participants through the study, including the number of participants with and without the outcome and, if applicable, a summary of the follow-up time. A diagram may be helpful. | Yes; Figure 1                   |
|                              | 13b  | D;V | Describe the characteristics of the participants (basic demographics, clinical features, available predictors), including the number of participants with missing data for predictors and outcome.    | Yes, P8, L168-180 and SupTable2 |
|                              | 13c  | V   | For validation, show a comparison with the development data of the distribution of important variables (demographics, predictors and outcome).                                                        | Yes, SupTable3                  |
| Model development            | 14a  | D   | Specify the number of participants and outcome events in each analysis.                                                                                                                               | Yes, P8, L168                   |
|                              | 14b  | D   | If done, report the unadjusted association between each candidate predictor and outcome.                                                                                                              | Yes, SupTable1                  |
| Model specification          | 15a  | D   | Present the full prediction model to allow predictions for individuals (i.e., all regression coefficients, and model intercept or baseline survival at a given time point).                           | Yes.                            |
|                              | 15b  | D   | Explain how to use the prediction model.                                                                                                                                                              | Yes, P9, L196                   |
| Model performance            | 16   | D;V | Report performance measures (with CIs) for the prediction model.                                                                                                                                      | Yes, P9, L190                   |
| Model-updating               | 17   | V   | If done, report the results from any model updating (i.e., model specification, model performance).                                                                                                   | NA                              |
| <b>Discussion</b>            |      |     |                                                                                                                                                                                                       |                                 |
| Limitations                  | 18   | D;V | Discuss any limitations of the study (such as nonrepresentative sample, few events per predictor, missing data).                                                                                      | Yes, P12, L246                  |
| Interpretation               | 19a  | V   | For validation, discuss the results with reference to performance in the development data, and any other validation data.                                                                             | Yes, P11, L237                  |
|                              | 19b  | D;V | Give an overall interpretation of the results, considering objectives, limitations, results from similar studies, and other relevant evidence.                                                        | Yes, P10 L210-245               |
| Implications                 | 20   | D;V | Discuss the potential clinical use of the model and implications for future research.                                                                                                                 | Yes, P12, L254                  |
| <b>Other information</b>     |      |     |                                                                                                                                                                                                       |                                 |
| Supplementary information    | 21   | D;V | Provide information about the availability of supplementary resources, such as study protocol, Web calculator, and data sets.                                                                         | Yes                             |
| Funding                      | 22   | D;V | Give the source of funding and the role of the funders for the present study.                                                                                                                         | NA                              |

\*Items relevant only to the development of a prediction model are denoted by D, items relating solely to a validation of a prediction model are denoted by V, and items relating to both are denoted D;V. We recommend using the TRIPOD Checklist in conjunction with the TRIPOD Explanation and Elaboration document.

# BMJ Open

## Severe Acute Kidney Injury Predicting Model based on transcontinental databases: a single-center prospective study

|                                 |                                                                                                                                                                                                                                                                                                                                                                                                                                                                                                          |
|---------------------------------|----------------------------------------------------------------------------------------------------------------------------------------------------------------------------------------------------------------------------------------------------------------------------------------------------------------------------------------------------------------------------------------------------------------------------------------------------------------------------------------------------------|
| Journal:                        | <i>BMJ Open</i>                                                                                                                                                                                                                                                                                                                                                                                                                                                                                          |
| Manuscript ID                   | bmjopen-2021-054092.R3                                                                                                                                                                                                                                                                                                                                                                                                                                                                                   |
| Article Type:                   | Original research                                                                                                                                                                                                                                                                                                                                                                                                                                                                                        |
| Date Submitted by the Author:   | 11-Dec-2021                                                                                                                                                                                                                                                                                                                                                                                                                                                                                              |
| Complete List of Authors:       | Liang, Qiqiang; Zhejiang University School of Medicine Second Affiliated Hospital<br>Xu, Yongfeng; Zhejiang University School of Medicine Second Affiliated Hospital<br>Zhou, Yu; Zhejiang University School of Medicine Second Affiliated Hospital<br>Chen, Xinyi; Zhejiang University School of Medicine Second Affiliated Hospital<br>Chen, Juan; Zhejiang University School of Medicine Second Affiliated Hospital<br>Huang, Man; Zhejiang University School of Medicine Second Affiliated Hospital, |
| <b>Primary Subject Heading</b>: | Intensive care                                                                                                                                                                                                                                                                                                                                                                                                                                                                                           |
| Secondary Subject Heading:      | Diagnostics                                                                                                                                                                                                                                                                                                                                                                                                                                                                                              |
| Keywords:                       | Acute renal failure < NEPHROLOGY, INTENSIVE & CRITICAL CARE, Information technology < BIOTECHNOLOGY & BIOINFORMATICS, Adult intensive & critical care < INTENSIVE & CRITICAL CARE                                                                                                                                                                                                                                                                                                                        |
|                                 |                                                                                                                                                                                                                                                                                                                                                                                                                                                                                                          |

SCHOLARONE™  
Manuscripts



I, the Submitting Author has the right to grant and does grant on behalf of all authors of the Work (as defined in the below author licence), an exclusive licence and/or a non-exclusive licence for contributions from authors who are: i) UK Crown employees; ii) where BMJ has agreed a CC-BY licence shall apply, and/or iii) in accordance with the terms applicable for US Federal Government officers or employees acting as part of their official duties; on a worldwide, perpetual, irrevocable, royalty-free basis to BMJ Publishing Group Ltd ("BMJ") its licensees and where the relevant Journal is co-owned by BMJ to the co-owners of the Journal, to publish the Work in this journal and any other BMJ products and to exploit all rights, as set out in our [licence](#).

The Submitting Author accepts and understands that any supply made under these terms is made by BMJ to the Submitting Author unless you are acting as an employee on behalf of your employer or a postgraduate student of an affiliated institution which is paying any applicable article publishing charge ("APC") for Open Access articles. Where the Submitting Author wishes to make the Work available on an Open Access basis (and intends to pay the relevant APC), the terms of reuse of such Open Access shall be governed by a Creative Commons licence – details of these licences and which [Creative Commons](#) licence will apply to this Work are set out in our licence referred to above.

Other than as permitted in any relevant BMJ Author's Self Archiving Policies, I confirm this Work has not been accepted for publication elsewhere, is not being considered for publication elsewhere and does not duplicate material already published. I confirm all authors consent to publication of this Work and authorise the granting of this licence.

1  
2  
3  
4 **1 Severe Acute Kidney Injury Predicting Model based on transcontinental**  
5  
6 **2 databases: a single-center prospective study**  
7  
8

9 **3** Qiqiang Liang<sup>1</sup>; Yongfeng Xu<sup>1</sup>; Yu Zhou<sup>2</sup>; Xinyi Chen<sup>2</sup>, MM; Juan Chen<sup>2</sup>; Man Huang<sup>1\*</sup>  
10

11 **4** General Intensive Care Unit, Second Affiliated Hospital of Zhejiang University School of Medicine, Hangzhou,  
12  
13  
14 **5** China.  
15

16  
17 **6** \*Corresponding author: Man Huang, MD PhD.  
18

19 **7** Department: General Intensive Care Unit  
20

21  
22 **8** Hospital: Second Affiliated Hospital of Zhejiang University School of Medicine  
23

24  
25 **9** Address: No. 1511, Jianghong Road, Bingjiang District, Hangzhou City, Zhejiang Province  
26

27 **10** Tel: + 86 571 89713427  
28

29  
30 **11** Fax: + 86 571 89713427  
31

32 **12** E-mail: [huangman@zju.edu.cn](mailto:huangman@zju.edu.cn).  
33

34  
35 **13** ORCID: 0000-0002-0842-2254  
36  
37  
38  
39  
40  
41  
42  
43  
44  
45  
46  
47  
48  
49  
50  
51  
52  
53  
54  
55  
56  
57  
58  
59  
60

1  
2  
3  
4 **23 Abstract:**

5  
6 **24 Objectives:** There are many studies of acute kidney injury (AKI) diagnosis models lack of external  
7  
8  
9 **25 validation and prospective validation.** We constructed the models using three databases to predict severe  
10  
11 **26 AKI within 48 hours in intensive care unit (ICU) patients.**

12  
13  
14 **27 Design:** A retrospective and prospective cohort study.

15  
16  
17 **28 Setting:** We studied critically ill patients in our database (SHZJU-ICU) and two other public databases,  
18  
19 **29 the Medical Information Mart for Intensive Care (MIMIC) and AmsterdamUMC databases, including**  
20  
21 **30 basic demographics, vital signs, and laboratory results.** We predicted the diagnosis of severe AKI in  
22  
23 **31 patients in the next 48 hours using machine-learning algorithms with the three databases.** Then, we  
24  
25 **32 carried out real-time severe AKI prediction in the prospective validation study at our center for one year.**

26  
27  
28  
29 **33 Participants:** All patients included in three databases with uniform exclusion criteria.

30  
31  
32 **34 Primary and secondary outcome measures:** Effect evaluation index of prediction models.

33  
34  
35 **35 Results:** We included 58492 patients, and a total of 5257 (9.0%) patients met the definition of severe  
36  
37 **36 AKI.** In the internal validation of the SHZJU-ICU and MIMIC databases, the best area under the receiver  
38  
39 **37 operating characteristic curve (AUROC) of the model was 0.86.** The external validation results by  
40  
41 **38 AmsterdamUMC database were also satisfactory, with the best AUROC of 0.86.** A total of 2532 patients  
42  
43 **39 were admitted to the center for prospective validation; 358 positive results were predicted, and 344**  
44  
45 **40 patients were diagnosed with severe AKI, with the best sensitivity of 0.72, the specificity of 0.80, and**  
46  
47 **41 the AUROC of 0.84.**

48  
49  
50  
51  
52  
53 **42 Conclusion:** The prediction model of severe AKI exhibits promises as a clinical application based on  
54  
55 **43 dynamic vital signs and laboratory results of multi-center databases with prospective and external**  
56  
57 **44 validation.**

1  
2  
3  
4 45 **Keywords:** Machine learning; Acute kidney injury; Real-time prospective validation; External  
5  
6 46 validation.

7  
8  
9 47 **Strengths and limitations of this study:**

10  
11 48 A prospective validation in machine learning of AKI research rather than other studies;

12  
13 49 Three large database containing different national populations and regions;

14  
15 50 Variable's sampling limited by the monitoring frequency of clinical data;

16  
17 51 Differences in the samples proportion of three databases;

18  
19 52 The dimensions of variables are not rich enough.

20  
21 53 **Data sharing statement:** No data available.

22  
23 54

24  
25 55 **Introduction:**

26  
27 56 Acute kidney injury (AKI), as a common clinical complication in the intensive care unit (ICU),

28  
29 57 significantly increases the duration of hospitalization and mortality[1]. AKI is divided into three types

30  
31 58 according to the various aetiologies: prerenal (renal hypoperfusion), intrarenal (vascular, glomerular, or

32  
33 59 tubulointerstitial lesions), and postrenal (urinary tract obstruction)[2]. Although nearly all diseases

34  
35 60 associated with ICU admission may cause AKI, acute tubular necrosis (ATN) and prerenal azotaemia

36  
37 61 are the most common causes[3].

38  
39 62 All AKI diagnostic criteria including the latest Kidney Disease: Improving Global Outcomes (KDIGO)

40  
41 63 standard are currently based on the creatinine level and urine volume[4]. However, the increase in the

42  
43 64 creatinine level or decrease in the urine volume lags the onset of AKI[2]. Many studies have suggested

44  
45 65 that early diagnosis and treatment of reversible AKI can reduce mortality[5]. Therefore, the creatinine

46  
47 66 level and urine volume are not satisfactory to meet clinical diagnostic demands. Consequently, many

1  
2  
3  
4 67 researchers have tried to develop an early warning model by analysing the risk factors for AKI[6].  
5  
6 68 Patient complications, such as diabetes, hypertension, cardiovascular disease, chronic liver disease,  
7  
8  
9 69 sepsis, and trauma, are identified as important risk factors for AKI[7]. The AKI prediction model and  
10  
11 70 scoring system developed based on high-risk factors has gradually become the focus of research  
12  
13  
14 71 considering the lower clinical application threshold compared with that of new biomarkers[6]. Although  
15  
16  
17 72 most previous prediction models use the multiple logistic regression model, a variety of AKI prediction  
18  
19 73 models based on machine learning have resulted in satisfactory outcomes[6]. Since the first AKI  
20  
21  
22 74 prediction model study based on artificial intelligence was published in 2016, researchers have built more  
23  
24  
25 75 than 20 published AKI prediction models successively by using local or multi-centre databases[6,8-14].  
26  
27 76 The results indicate that these models can predict the occurrence of AKI and the need for renal  
28  
29  
30 77 replacement therapy (RRT) within 24 or 48 hours, with accuracies ranging from 81% to 97%[6,15]. In  
31  
32  
33 78 addition, many studies have focused on subspecialized conditions, including cardiac surgery, trauma,  
34  
35  
36 79 and burns[14-16]. However, the common defect in these studies is the lack of external validation and  
37  
38  
39 80 prospective validation, which causes the prediction model to deviate from the clinical scenarios and limits  
40  
41  
42 81 extrapolation beyond the scope of the data.

43 82 In this study, we built models to predict AKI within 48 hours in critically ill patients by using  
44  
45  
46 83 transcontinental three databases. Then, we evaluated the clinical effect of the model through a one-year  
47  
48  
49 84 prospective validation at our centre.

50  
51 85

## 52 53 86 **Methods:**

### 54 55 56 87 **Study design and setting**

57  
58 88 We collected patients using three ICU databases and prospectively validated the models in our centre.  
59  
60

1  
2  
3  
4 89 The first database was our centre general ICU database (SHZJU-ICU) of the Second Affiliated Hospital  
5  
6 90 of Zhejiang University School of Medicine, an academic teaching hospital. Since its establishment in  
7  
8  
9 91 2017, it has included 12000 ICU patients' data and is updated daily. The Medical Information Mart for  
10  
11 92 Intensive Care (MIMIC) III database, the second one, is an open ICU database provided by the  
12  
13 93 Massachusetts Institute of Technology and includes nearly 60000 ICU patients from North America[17].  
14  
15  
16 94 Lastly, the AmsterdamUMC database is an available European ICU database with health data related to  
17  
18  
19 95 23000 patients admitted to ICUs in parts of Europe[18]. The research flow chart is shown in Figure 1.  
20  
21  
22 96

### 97 **Study definition**

27 98 In this study, the diagnosis of AKI was confirmed based on three stages according to the KDIGO  
28  
29 99 criteria[4]. We defined the patients who met the KDIGO AKI II and III criteria as severe AKI groups  
30  
31  
32 100 and the others as negative groups. We excluded patients with lack of creatinine measurements during  
33  
34  
35 101 admission, patients with creatinine baseline more than 3.0 mg/dL at admission, patients who met severe  
36  
37 102 AKI diagnosis within 24 hours, and patients who used RRT within 48 hours after admission[19]. In  
38  
39  
40 103 addition, we excluded pregnant women, patients younger than 14 years old, and patients hospitalized in  
41  
42  
43 104 the ICU for fewer than 48 hours. After the patient was admitted to ICU, we performed a prediction every  
44  
45 105 24 hours and recorded a prediction time. If the patient was diagnosed with severe AKI within 48 hours,  
46  
47  
48 106 the predictive time was defined as a positive predictive point, and the others were defined as a negative  
49  
50  
51 107 point. The study was evaluated and approved by the Ethics Committee of the Second Affiliated Hospital  
52  
53 108 of Zhejiang University School of Medicine as study number 2019-078.

### 56 109 **Data Collection**

57  
58 110 The variables included demographic data, vital signs, basic and primary diseases, laboratory results,  
59  
60



1  
2  
3  
4 111 important operation records, and drug records. Comorbidity included hypertension, diabetes, cardiopathy,  
5  
6 112 liver disease, and malignant tumors. The primary disease was the main cause of admission to the ICU  
7  
8  
9 113 following the ICD-10 codes. The vital signs and clinical laboratory results were transformed into  
10  
11 114 different variables according to the average, variance, maximum, minimum, and final value before  
12  
13  
14 115 diagnosis. We use a method similar to the forward incremental method in the multivariate logic  
15  
16  
17 116 regression model, that is, the combination of embedded feature selection and forward addition for feature  
18  
19  
20 117 selection. First of all, all variables are trained in the model, then list by variables importance. variables  
21  
22 118 are added to the model one by one according to the variable importance. a variable is retained if it causes  
23  
24  
25 119 the AUC growth to be greater than 0.01, otherwise delete it. We transformed the MIMIC and  
26  
27 120 AmsterdamUMC databases according to our centre database structure, unifying the unit and diagnostic  
28  
29  
30 121 codes. We deleted variables missing more than 50%. Variables missing more than 30% but less than 50%  
31  
32 122 are listed to clinicians who determine the potential correlation between these variables and AKI. We  
33  
34  
35 123 carry out multiple interpolation for these variables which clinicians require to be retained, and the others  
36  
37  
38 124 deleted. Variables missing less than 30% are fill in multiple interpolation. All Missing data between three  
39  
40 125 databases and values included in the model shown in supplementation file Table S1.

#### 42 126 **Model construction and external validation**

43  
44  
45 127 The ratio of the training and internal validation sets was 4:1. The SHZJU and MIMIC databases  
46  
47  
48 128 training sets were mixed into a new training set. There were more negative data than positive data, so we  
49  
50  
51 129 randomly sampled the negative datasets and constructed a new data subset with a sampling ratio of  
52  
53 130 positive and negative data of 1:5 in model building in order to extract the importance variables. In the  
54  
55  
56 131 subsequent model validation, we adopted the original data set. We used multiple logistic regression,  
57  
58 132 random forest, XGBoost, AdaBoost, LightGBoost, gradient boosting decision tree (GBDT), and debug  
59  
60

1  
2  
3  
4 133 to assess the variables and model-related parameters by the fivefold cross-validation method. After the  
5  
6 134 models were built, we used the SHZJU-ICU and MIMIC test sets for internal validation of the model and  
7  
8  
9 135 the AmsterdamUMC database for external validation. The most appropriate cut-off value was determined  
10  
11  
12 136 according to the K-S curve. The prediction model represents the results of each prediction with a  
13  
14 137 probability between 0 to 1.0. We define results more than 0.4 as high-risk, that is, positive results, and  
15  
16  
17 138 the rest as negative results. Through internal validation and external validation, we calibrated the model  
18  
19 139 by adjusting the super-parameters and using the Platt calibration algorithm and compared the calibration  
20  
21  
22 140 effect by drawing a reliability diagram. All model building and validation processes were performed in  
23  
24  
25 141 Python 3.6.

#### 27 142 **Prospective validation**

29  
30 143 The prospective research period was 2020.01.01 to 2020.12.31. We collected real-time data when  
31  
32 144 patients were admitted to the ICU, transformed the data according to the requirements, and formed a  
33  
34 145 complete sample for the prediction model after passing the integrity test. We had established a  
35  
36  
37 146 visualization scheme and allowed researchers to review the predictions daily. The daily prediction results  
38  
39  
40 147 were not publicly accessible during the study to avoid affecting clinicians' decisions, but the diagnosis  
41  
42  
43 148 results were available to the researchers as visual graphics. We sampled the 20% predicted data every  
44  
45  
46 149 month and deleted samples with more than 50% missing values to ensure data correctness. When a patient  
47  
48 150 has the following conditions, AKI prediction system will end the patient's prospective prediction: A. a  
49  
50  
51 151 positive diagnosis; B. Transfer out of ICU or death with negative diagnosis. All diagnosis of severe AKI  
52  
53 152 needs to be reviewed by two ICU attending physicians independently, and if the they have different  
54  
55  
56 153 opinion, the third one will be appealed.

#### 58 154 **Statistical analysis:**

1  
2  
3  
4 155 The population characteristics were reported as the medians and inter-quartile ranges (IQRs) for  
5  
6 156 skewed data and the means and standard deviations for normally distributed data. The independent  
7  
8  
9 157 sample T-test was used for normally distributed data, and the rank-sum test was used for the rest.  
10  
11  
12 158 Dichotomous variables were assessed by the chi-square test, and a P value less than 0.05 was considered  
13  
14 159 statistically significant. The non-normally distributed data were analyzed by exponential transformation  
15  
16  
17 160 and logarithmic transformation. The effect of the model was evaluated by parameters such as the  
18  
19  
20 161 AUROC, accuracy, specificity, and F1-score.

#### 22 162 **Patient and Public Involvement:**

23  
24  
25 163 The information of cases in three databases was in a state of complete desensitization in the process  
26  
27 164 of building the model. During the prospective study, all the patients signed an informed consent form at  
28  
29  
30 165 the beginning of admission to ICU. The real-time data discussed and used by only the study members,  
31  
32  
33 166 and were not made public during the study period. All data were anonymized before the authors accessed  
34  
35 167 them for the purpose of this study. Therefore, patients' priorities, experience, and preferences will not  
36  
37  
38 168 affect the development of the research question and outcome measures. If necessary, we will inform  
39  
40 169 patients of relevant research results by telephone.

42  
43 170

#### 45 171 **Results:**

46  
47  
48 172 According to the inclusion criteria and exclusion criteria, we selected 58492 patients from three  
49  
50 173 databases who met the requirements of the study, including 6461 patients from the SHZJU-ICU database,  
51  
52  
53 174 36690 patients from the MIMIC database, and 15341 patients from the AmsterdamUMC database. A  
54  
55  
56 175 total of 5257 (9.0%) patients met the definition of severe AKI (11.8% in SHZJU-ICU, 7.6% in MIMIC,  
57  
58  
59 176 and 10.9% in AmsterdamUMC). The distributions of age and sex in the three centers were similar, but  
60

177 the differences in race were large. Asian patients accounted for more than 99% in the SHZJU-ICU  
 178 database, and only approximately 2.5% in the MIMIC database. White people accounted for more than  
 179 70% of the MIMIC database. In addition, patients from the MIMIC database had a higher incidence of  
 180 the tumor, liver cirrhosis, diabetes, and hypertension. Patients in the AmsterdamUMC and SHZJU-ICU  
 181 databases had a higher proportion of mechanical ventilation and overall survival rate. Severe AKI  
 182 patients had longer ICU hospital stays and higher mortality. More details are presented in Table 1.  
 183 Table 1: Clinical Demographics and Outcomes in patients with or without severe acute  
 184 kidney injury.

|                                  | SHZJU-ICU<br>Negative<br>(N=5695) | SHZJU-ICU<br>Severe AKI<br>(N=766) | P-<br>valu<br>e | MIMIC<br>Negative<br>(N=33879) | MIMIC<br>Severe AKI<br>(N=2811) | P-<br>value | AmsterdamUMC<br>Negative<br>(N=13661) | AmsterdamUMC<br>severe AKI<br>(N=1680) | P-<br>value |
|----------------------------------|-----------------------------------|------------------------------------|-----------------|--------------------------------|---------------------------------|-------------|---------------------------------------|----------------------------------------|-------------|
| Age, median [IQR]                | 60.5<br>[48.8-70.1]               | 62.1<br>[50.1-72.5]                | 0.00<br>4       | 62.0<br>[45.0-76.0]            | 64.0<br>[52.0-76.0]             | <0.001      | 64.5<br>[54.5,74.5]                   | 64.3<br>[52.5,78.5]                    | 0.04        |
| Gender, male (%)                 | 3561 (64.9)                       | 438 (59.8)                         | 0.00<br>7       | 18976 (56.0)                   | 1524 (54.2)                     | 0.06        | 8920 (65.3)                           | 1054 (63.9)                            | 0.03        |
| Race                             |                                   |                                    |                 |                                |                                 |             | /                                     | /                                      | /           |
| White                            | 3 (0.05)                          | 1 (0.1)                            | 1               | 23796 (70.2)                   | 2005 (71.3)                     | 0.23        | /                                     | /                                      | /           |
| Black                            | 1 (0.02)                          | 0                                  | 1               | 2455 (7.2)                     | 199 (7.1)                       | 0.45        | /                                     | /                                      | /           |
| Asian                            | 5691(99.9)                        | 764 (99.7)                         | 1               | 918 (2.7)                      | 70 (2.5)                        | 0.54        | /                                     | /                                      | /           |
| Other                            | 0                                 | 1 (0.1)                            | 1               | 6710 (19.8)                    | 537 (19.1)                      | 0.34        | /                                     | /                                      | /           |
| Admission Scr (mg/dL), mean (sd) | 0.9 (0.34)                        | 1.0 (0.40)                         | <0.0<br>01      | 1.1 (0.41)                     | 1.1 (0.50)                      | 0.04        | 1.2 (0.35)                            | 1.1 (0.38)                             | <0.00<br>1  |
| Admission BUN (mg/dL), mean (sd) | 18 (11)                           | 21 (9)                             | <0.0<br>01      | 17 (12)                        | 23 (12)                         | <0.001      | 18 (13)                               | 23 (10)                                | <0.00<br>1  |
| Cancer, n (%)                    | 644 (11.3)                        | 48 (6.3)                           | <0.0<br>01      | 6652 (19.6)                    | 752 (26.8)                      | <0.001      | /                                     | /                                      | /           |
| Cirrhosis, n (%)                 | 43 (0.8)                          | 6 (0.8)                            | 0.89            | 1180 (3.5)                     | 426 (15.2)                      | <0.001      | /                                     | /                                      | /           |
| Cardiopathy, n (%)               | 231 (4.1)                         | 42 (5.5)                           | 0.08            | 4840 (14.3)                    | 336 (12.0)                      | 0.001       | /                                     | /                                      | /           |
| Diabetes, n (%)                  | 305 (5.4)                         | 63 (8.2)                           | 0.00<br>2       | 7250 (21.4)                    | 789 (28.1)                      | <0.001      | /                                     | /                                      | /           |
| Hypertension, n (%)              | 889 (15.6)                        | 115 (15.0)                         | 0.70            | 16328 (48.2)                   | 1513 (53.8)                     | <0.001      | /                                     | /                                      | /           |
| Ventilation, n (%)               | 2569 (45.1)                       | 592 (77.3)                         | <0.0<br>01      | 13009 (38.4)                   | 1503(53.5)                      | <0.001      | 7718(56.5)                            | 1248(74.3)                             | <0.00<br>1  |

1  
2  
3  
4  
5  
6  
7  
8  
9  
10

|                                |                   |                    |        |                   |                    |        |                  |                    |        |
|--------------------------------|-------------------|--------------------|--------|-------------------|--------------------|--------|------------------|--------------------|--------|
| <b>Operation, n (%)</b>        | 3361 (59.1)       | 373 (48.7)         | <0.001 | 12455 (36.7)      | 1430 (50.8)        | <0.001 | /                | /                  | /      |
| <b>ICU Hours, median [IQR]</b> | 50.8 [23.0-139.5] | 164.4 [70.3-328.6] | <0.001 | 51.0 [28.5-110.3] | 103.4 [50.1-261.3] | <0.001 | 24.0 [19.8,63.5] | 142.0 [45.4,394.2] | <0.001 |
| <b>Survived, n (%)</b>         | 4997 (87.7)       | 380 (49.6)         | <0.001 | 25648 (75.7)      | 1356 (48.2)        | <0.001 | 10942(80.1)      | 1033 (61.5)        | <0.001 |

11  
12  
13  
14  
15  
16  
17  
18  
19  
20  
21  
22  
23  
24  
25  
26  
27  
28  
29  
30  
31  
32  
33  
34  
35  
36  
37  
38  
39  
40  
41  
42  
43  
44  
45  
46  
47  
48  
49  
50  
51  
52  
53

185 SHZJU-ICU: The general ICU database of the second affiliated hospital of Zhejiang university  
186 school of medicine; MIMIC: Medical Information Mart for Intensive Care; IQR: Inter-Quartile  
187 Range; ICU: Intensive Care Unit; AKI: Acute Kidney Injury. Scr: serum creatinine; BUN: blood  
188 urea nitrogen.

189 There were significant differences in the important parameters of the variables among the different  
190 models (see Figure S1). However, the trend of the creatinine level in the past week was still an important  
191 variable, followed by urine volume, blood urea nitrogen level, temperature, and length of ICU stay. The  
192 cut-off value used to distinguish between a negative and positive prediction was determined by the K-S  
193 curve, with value of 0.423 (see Figure S2). The GBDT model had the best prediction effect in the test  
194 set, followed by XGBoost and LightGBoost. In the two central internal validation sets, the two best-  
195 performing machine learning algorithms with great AUROC are LightGBoost (SHZJU-ICU of 83.2%,  
196 MIMIC of 86.0%) and XGBoost (SHZJU-ICU 85.9%, MIMIC 85.6%), as detailed in Figure 2. Overall,  
197 the sensitivity (SHZJU-ICU 0.84, MIMIC 0.83) and the negative predictive value (SHZJU-ICU 0.90,  
198 MIMIC 0.90) of the predictive model were high, but the specificity was general (SHZJU-ICU 0.79,  
199 MIMIC 0.75), as shown in Table 2. In the external validation based on AmsterdamUMC database, the  
200 overall model validation effect results were satisfactory, and XGBoost had the best performance, with  
201 an AUROC of 0.84, as shown in Figure 2 and Table 2.

202

203 Table 2: Model validation results by three databases with machine learning algorithm

| Model                                              | AUROC | Accuracy | Sensitivity | Specificity | PPV   | NPV   | F1    |
|----------------------------------------------------|-------|----------|-------------|-------------|-------|-------|-------|
| <b>Internal validation with SHZJU-ICU database</b> |       |          |             |             |       |       |       |
| <b>Logistic regression</b>                         | 0.748 | 0.662    | 0.834       | 0.576       | 0.496 | 0.874 | 0.622 |
| <b>LightGBoost</b>                                 | 0.832 | 0.741    | 0.839       | 0.692       | 0.576 | 0.896 | 0.683 |

10

|                                                       |              |       |       |       |       |       |       |
|-------------------------------------------------------|--------------|-------|-------|-------|-------|-------|-------|
| <b>GBDT</b>                                           | 0.845        | 0.765 | 0.843 | 0.725 | 0.606 | 0.902 | 0.705 |
| <b>AdaBoost</b>                                       | 0.806        | 0.721 | 0.824 | 0.67  | 0.555 | 0.884 | 0.663 |
| <b>Random Forest</b>                                  | 0.821        | 0.763 | 0.71  | 0.789 | 0.627 | 0.845 | 0.666 |
| <b>XGBoost</b>                                        | <b>0.859</b> | 0.779 | 0.81  | 0.763 | 0.631 | 0.889 | 0.709 |
| <b>Internal validation with MIMIC database</b>        |              |       |       |       |       |       |       |
| <b>Logistic regression</b>                            | 0.733        | 0.695 | 0.643 | 0.72  | 0.535 | 0.801 | 0.584 |
| <b>LightGBost</b>                                     | <b>0.86</b>  | 0.768 | 0.822 | 0.741 | 0.613 | 0.893 | 0.702 |
| <b>GBDT</b>                                           | 0.846        | 0.765 | 0.786 | 0.755 | 0.616 | 0.876 | 0.691 |
| <b>AdaBoost</b>                                       | 0.837        | 0.732 | 0.831 | 0.683 | 0.567 | 0.89  | 0.674 |
| <b>Random Forest</b>                                  | 0.832        | 0.738 | 0.791 | 0.712 | 0.578 | 0.872 | 0.668 |
| <b>XGBoost</b>                                        | 0.856        | 0.758 | 0.833 | 0.721 | 0.598 | 0.895 | 0.695 |
| <b>External validation with AmsterdamUMC database</b> |              |       |       |       |       |       |       |
| <b>Logistic regression</b>                            | 0.704        | 0.767 | 0.516 | 0.893 | 0.706 | 0.787 | 0.596 |
| <b>LightGBost</b>                                     | 0.859        | 0.763 | 0.827 | 0.731 | 0.606 | 0.894 | 0.7   |
| <b>GBDT</b>                                           | 0.861        | 0.764 | 0.84  | 0.727 | 0.606 | 0.901 | 0.704 |
| <b>AdaBoost</b>                                       | 0.85         | 0.755 | 0.813 | 0.726 | 0.597 | 0.886 | 0.689 |
| <b>Random Forest</b>                                  | 0.82         | 0.743 | 0.77  | 0.729 | 0.587 | 0.864 | 0.666 |
| <b>XGBoost</b>                                        | <b>0.865</b> | 0.75  | 0.873 | 0.688 | 0.584 | 0.916 | 0.7   |
| <b>Prospective validation with SHZJU-ICU</b>          |              |       |       |       |       |       |       |
| <b>Logistic regression</b>                            | 0.758        | 0.772 | 0.648 | 0.834 | 0.662 | 0.826 | 0.655 |
| <b>LightGBost</b>                                     | 0.819        | 0.796 | 0.596 | 0.895 | 0.74  | 0.816 | 0.66  |
| <b>GBDT</b>                                           | 0.827        | 0.781 | 0.706 | 0.818 | 0.66  | 0.848 | 0.683 |
| <b>AdaBoost</b>                                       | 0.808        | 0.766 | 0.686 | 0.805 | 0.638 | 0.837 | 0.661 |
| <b>Random Forest</b>                                  | 0.804        | 0.755 | 0.715 | 0.775 | 0.613 | 0.845 | 0.66  |
| <b>XGBoost</b>                                        | <b>0.841</b> | 0.779 | 0.724 | 0.807 | 0.652 | 0.854 | 0.686 |

204 AUROC: Area Under Receiver Operating Characteristic; PPV: Positive Predictive Value; NPV:  
 205 Negative Predictive Value; SHZJU-ICU: The general ICU database of the second affiliated  
 206 hospital of Zhejiang university school of medicine; MIMIC: Medical Information Mart for  
 207 Intensive Care; GBDT: Gradient Boosted Decision Tree.

208

209 According to the inclusion and exclusion criteria, we delete 267 patients among 94 patients with  
 210 creatinine baseline more than 3.0 mg/dL at admission, 39 patients met severe AKI diagnosis within 24  
 211 hours, and 26 patients who used RRT within 48 hours after admission, 108 patients hospitalized in the  
 212 ICU for fewer than 48 hours. A total of 2532 patients were admitted to our centre for prospective  
 213 validation, and the prediction model made 16858 times predictions. In the prospective cohort, there was  
 214 no significant difference in age, gender, baseline creatinine and urea nitrogen, and complications. The

1  
2  
3  
4 215 proportion of mechanical ventilation and the ICU stay time in AKI patients were longer with higher  
5  
6 216 mortality. Above all, there was no significant difference between the prospective and the retrospective  
7  
8  
9 217 cohort. More detail sees in supplementation file Table S2. In the end, 358 positive results were predicted,  
10  
11 218 and the rest were negative results. There are 344 patients with severe AKI were diagnosed and the  
12  
13  
14 219 prediction accuracy was 83.5%. The model with the highest area under the curve was XGBoost, 0.84  
15  
16  
17 220 with the best sensitivity of 0.72, the specificity of 0.80. The results of the prospective study are similar  
18  
19 221 to those of the external validation of the model, and are relatively stable. More detail is presented in  
20  
21  
22 222 Figure 3 and Table 2.  
23  
24  
25 223

#### 27 224 **Discussion:**

29  
30 225 In this study, we built predictive models by machine learning to predict the incidence of severe AKI  
31  
32 226 with three databases in different regions and in the next 48 hours. After internal and external validation,  
33  
34  
35 227 prospective validation over one year was carried out to verify the model effects. The three databases  
36  
37  
38 228 come from three countries that are in Asia, Europe, and North America, which proves that the model is  
39  
40 229 universal to some extent.

41  
42  
43 230 Despite the huge amount of data, many databases are still not suitable for prospective research  
44  
45 231 because they are not updated promptly. Tomasev, N and colleagues have provided research on AKI  
46  
47  
48 232 prediction models with a large amount of data[10]. The study covered 703782 adult patients with 6 billion  
49  
50  
51 233 individual items, including 620000 elements. In this study, a depth neural network model was used for  
52  
53 234 real-time prediction. A total of 55.8% of severe AKI patients were predicted within the first 48 hours,  
54  
55  
56 235 although each accurate prediction was accompanied by two mispredictions[10]. This study provided a  
57  
58  
59 236 new scheme for real-time prediction and indicated that we should prospectively evaluate and  
60

1  
2  
3  
4 237 independently validate models to explore their effectiveness. In a prospective study, Flechet, M et al  
5  
6 238 compared an AKI prediction model with clinicians in 252 patients and found that the clinical effect of  
7  
8  
9 239 the random forest model for predicting AKI-II/III was equivalent to that of clinicians. Our prediction  
10  
11 240 model graphical visualization of the model was installed in the centre's database for better usage. In  
12  
13  
14 241 addition, our database is updated daily to achieve daily predictions and present the results to researchers.  
15  
16  
17 242 In the prospective validation of our study, the stability of the prediction model confirmed its promise,  
18  
19 243 which provides a basis for future research.

20  
21  
22 244 There are many studies of artificial intelligence for predicting the occurrence of AKI, but most of them  
23  
24 245 are single-centre studies, and the extrapolation effect has been controversial. In 2016, Koyner, J, and his  
25  
26  
27 246 colleague published the first study of an AKI prediction model based on multi-centre data. In all 202961  
28  
29 247 patients, 17541 (8.6%) had AKI, 4251 (3.5%) had AKI-II, and 1242 (0.6%) had AKI-III. A multivariate  
30  
31 248 logistic regression model was used to predict AKI in this study with an AUROC of 0.74 (95% CI=0.74).  
32  
33 249 With the classification of AKI, the AUROC of the prediction model gradually increased to 0.84[8].  
34  
35  
36 250 Subsequently, the study team used a new machine learning algorithm, to build a more accurate model to  
37  
38 251 predict the occurrence of AKI-II, with an AUROC of 0.9 within 24 hours and 0.87 within 48 hours[19].  
39  
40  
41 252 Recently, the research team included data from two other centres, namely, LUMC (N=200613) and NUS  
42  
43 253 (N=246895), to externally validate the AKI-II prediction model with AUROCs reaching 0.85 to 0.86,  
44  
45  
46 254 suggesting that the artificial intelligence model has stable predictive ability[12]. This series of studies  
47  
48  
49 255 included many data points, suggesting the feasibility of artificial intelligence in the diagnosis of AKI,  
50  
51  
52 256 but the proportion of positive patients (3.5%) and ICU patients (30%) was too low to properly predict  
53  
54  
55 257 AKI. Our research is similar to the above. The SAHZJU-ICU database is a single-centre database  
56  
57  
58 258 representing south-eastern China, and the MIMIC database is a well-known open ICU database in the  
59  
60



1  
2  
3  
4 259 United States. The AmsterdamUMC database is a public database located in Europe. The population  
5  
6 260 structure and diseases in the three databases are complete but different in the distribution of complications  
7  
8  
9 261 and race. Therefore, it provides a prediction model with unparalleled stability compared with other  
10  
11 262 studies.

12  
13  
14 263

15  
16  
17 264 **Limitations:**

18  
19 265 This retrospective multi-centre study was unable to carry out more clinical feature mining and  
20  
21  
22 266 comparison because of different data structures. The differences between the three databases partly  
23  
24  
25 267 reflect some demographic differences between Europe, the United States and China, resulting in a decline  
26  
27  
28 268 in the accuracy of the prediction model. There are some differences in the number of patients included  
29  
30  
31 269 in the three databases, which may affect the choice of variables. As a result of the study design, we  
32  
33  
34 270 deleted patients with ICU hospitalization of less than 48 hours, which may result in the exclusion of most  
35  
36  
37 271 relatively mild patients and may reduce false positives. Second, in the prospective data study in 2020,  
38  
39  
40 272 there may be deviations in the inclusion of patients in the centre, thus affecting the interpretation of the  
41  
42  
43 273 follow-up prospective results. Finally, given the low incidence of severe AKI and the great difference in  
44  
45  
46 274 the proportion of positive and negative samples, the data may be accidental. Our model seems to be  
47  
48  
49 275 superior to diagnostic non-AKI patients rather than AKI because of the proportion of positive data that  
50  
51  
52 276 we include. In the retrospective study, we reduced the proportion of negative data by randomization but  
53  
54  
55 277 retain all data in prospective phase with the sensitivity decreases.

56  
57 278

58  
59 279 **Conclusion:**

60 280 Based on databases of patients of different races from different countries, we constructed stable

1  
2  
3  
4 281 machine learning models to predict the occurrence of AKI in the next 48 hours. Prospective validation  
5  
6 282 through the implementation of an updated local database is an effective exploration of further research.  
7  
8

9 283

10  
11 284 Data sharing statement: No data available.

12  
13  
14 285 Ethics approval: Our research was approved by the ethics committee of the Second Affiliated Hospital  
15  
16  
17 286 of Zhejiang University School of Medicine.

18  
19 287 Competing interests for authors: The authors declare that they have no competing interests.  
20  
21

22 288

23  
24  
25 289 **Reference:**

26  
27 290 1. Ronco, C.; Bellomo, R.; Kellum, J.A. Acute kidney injury. *The Lancet* **2019**, *394*, 1949-  
28  
29 291 1964, doi:10.1016/s0140-6736(19)32563-2.

30  
31  
32 292 2. Pakula, A.M.; Skinner, R.A. Acute Kidney Injury in the Critically Ill Patient: A Current  
33  
34 293 Review of the Literature. *J Intensive Care Med* **2016**, *31*, 319-324,  
35  
36 294 doi:10.1177/0885066615575699.

37  
38  
39 295 3. Bellomo, R.; Kellum, J.A.; Ronco, C. Acute kidney injury. *The Lancet* **2012**, *380*, 756-  
40  
41 296 766, doi:10.1016/s0140-6736(11)61454-2.

42  
43  
44 297 4. Khwaja, A. KDIGO clinical practice guidelines for acute kidney injury. *Nephron Clin*  
45  
46 298 *Pract* **2012**, *120*, c179-184, doi:10.1159/000339789.

47  
48  
49 299 5. Coelho, S.; Cabral, G.; Lopes, J.A.; Jacinto, A. Renal regeneration after acute kidney  
50  
51 300 injury. *Nephrology (Carlton)* **2018**, *23*, 805-814, doi:10.1111/nep.13256.

52  
53  
54 301 6. Wilson, F.P.; Greenberg, J.H. Acute Kidney Injury in Real Time: Prediction, Alerts, and  
55  
56 302 Clinical Decision Support. *Nephron* **2018**, *140*, 116-119, doi:10.1159/000492064.  
57  
58  
59  
60

- 1  
2  
3  
4 303 7. Wu, Y.; Hao, W.; Chen, Y.; Chen, S.; Liu, W.; Yu, F.; Hu, W.; Liang, X. Clinical features,  
5  
6 304 risk factors, and clinical burden of acute kidney injury in older adults. *Ren Fail* **2020**,  
7  
8  
9 305 *42*, 1127-1134, doi:10.1080/0886022X.2020.1843491.  
10  
11 306 8. Koyner, J.L.; Adhikari, R.; Edelson, D.P.; Churpek, M.M. Development of a Multicenter  
12  
13  
14 307 Ward-Based AKI Prediction Model. *Clin J Am Soc Nephrol* **2016**, *11*, 1935-1943,  
15  
16  
17 308 doi:10.2215/CJN.00280116.  
18  
19 309 9. Low, S.; Vathsala, A.; Murali, T.M.; Pang, L.; MacLaren, G.; Ng, W.Y.; Haroon, S.;  
20  
21  
22 310 Mukhopadhyay, A.; Lim, S.L.; Tan, B.H., et al. Electronic health records accurately  
23  
24  
25 311 predict renal replacement therapy in acute kidney injury. *BMC Nephrol* **2019**, *20*, 32,  
26  
27  
28 312 doi:10.1186/s12882-019-1206-4.  
29  
30 313 10. Tomasev, N.; Glorot, X.; Rae, J.W.; Zielinski, M.; Askham, H.; Saraiva, A.; Mottram, A.;  
31  
32  
33 314 Meyer, C.; Ravuri, S.; Protsyuk, I., et al. A clinically applicable approach to continuous  
34  
35  
36 315 prediction of future acute kidney injury. *Nature* **2019**, *572*, 116-119,  
37  
38  
39 316 doi:10.1038/s41586-019-1390-1.  
40  
41 317 11. Flechet, M.; Falini, S.; Bonetti, C.; Güiza, F.; Schetz, M.; Van den Berghe, G.; Meyfroidt,  
42  
43  
44 318 G. Machine learning versus physicians' prediction of acute kidney injury in critically ill  
45  
46  
47 319 adults: a prospective evaluation of the AKIpredictor. *Critical Care* **2019**, *23*, 282,  
48  
49  
50 320 doi:10.1186/s13054-019-2563-x.  
51  
52  
53 321 12. Churpek, M.M.; Carey, K.A.; Edelson, D.P.; Singh, T.; Astor, B.C.; Gilbert, E.R.;  
54  
55  
56 322 Winslow, C.; Shah, N.; Afshar, M.; Koyner, J.L. Internal and External Validation of a  
57  
58  
59 323 Machine Learning Risk Score for Acute Kidney Injury. *JAMA Netw Open* **2020**, *3*,  
60  
324 e2012892, doi:10.1001/jamanetworkopen.2020.12892.

- 1  
2  
3  
4 325 13. Yuan, Q.; Zhang, H.; Deng, T.; Tang, S.; Yuan, X.; Tang, W.; Xie, Y.; Ge, H.; Wang,  
5  
6 326 X.; Zhou, Q., et al. Role of Artificial Intelligence in Kidney Disease. *Int J Med Sci* **2020**,  
7  
8 327 17, 970-984, doi:10.7150/ijms.42078.
- 9  
10  
11 328 14. Li, Y.; Xu, J.; Wang, Y.; Zhang, Y.; Jiang, W.; Shen, B.; Ding, X. A novel machine  
12  
13 329 learning algorithm, Bayesian networks model, to predict the high-risk patients with  
14  
15 330 cardiac surgery-associated acute kidney injury. *Clin Cardiol* **2020**, 43, 752-761,  
16  
17 331 doi:10.1002/clc.23377.
- 18  
19 332 15. De Vlieger, G.; Kashani, K.; Meyfroidt, G. Artificial intelligence to guide management  
20  
21 333 of acute kidney injury in the ICU: a narrative review. *Curr Opin Crit Care* **2020**, 26, 563-  
22  
23 334 573, doi:10.1097/MCC.0000000000000775.
- 24  
25 335 16. James, M.T.; Pannu, N.; Hemmelgarn, B.R.; Austin, P.C.; Tan, Z.; McArthur, E.; Manns,  
26  
27 336 B.J.; Tonelli, M.; Wald, R.; Quinn, R.R., et al. Derivation and External Validation of  
28  
29 337 Prediction Models for Advanced Chronic Kidney Disease Following Acute Kidney Injury.  
30  
31 338 *JAMA* **2017**, 318, 1787-1797, doi:10.1001/jama.2017.16326.
- 32  
33 339 17. Johnson, A.E.; Pollard, T.J.; Shen, L.; Lehman, L.W.; Feng, M.; Ghassemi, M.; Moody,  
34  
35 340 B.; Szolovits, P.A.-O.; Celi, L.A.; Mark, R.A.-O. MIMIC-III, a freely accessible critical  
36  
37 341 care database.
- 38  
39 342 18. Thorat, P.J.; Peppink, J.M.; Driessen, R.H.; Sijbrands, E.J.G.; Kompanje, E.J.O.;  
40  
41 343 Kaplan, L.; Bailey, H.; Kesecioglu, J.; Cecconi, M.; Churpek, M., et al. Sharing ICU  
42  
43 344 Patient Data Responsibly Under the Society of Critical Care Medicine/European  
44  
45 345 Society of Intensive Care Medicine Joint Data Science Collaboration: The Amsterdam  
46  
47 346 University Medical Centers Database (AmsterdamUMCdb) Example. *Crit Care Med*

1  
2  
3  
4 347 2021, 10.1097/CCM.0000000000004916, doi:10.1097/CCM.0000000000004916.

5  
6 348 19. Koyner, J.L.; Carey, K.A.; Edelson, D.P.; Churpek, M.M. The Development of a  
7  
8  
9 349 Machine Learning Inpatient Acute Kidney Injury Prediction Model. *Crit Care Med* 2018,  
10  
11 350 46, 1070-1077, doi:10.1097/CCM.0000000000003123.

12  
13  
14 351

15  
16  
17 352 **Footnotes**

18  
19 353 Contributions: Conceptualization, QL and MH; Methodology, YX; Software, YX; Validation, YZ, and  
20  
21  
22 354 YX.; Formal Analysis, JC and XC; Resources, MH; Data Curation, QL; Writing – Original Draft  
23  
24  
25 355 Preparation, QL; Writing – Review & Editing, MH; Visualization, YX; Supervision, YZ and QL; Project  
26  
27 356 Administration, QL;

28  
29  
30 357 **Funding:** This research received no specific grant from any funding agency in the public, commercial  
31  
32 358 or not-for-profit sectors.

33  
34  
35 359 Conflicts of Interest: Not Applicable.

36  
37  
38 360 Patient and public involvement Patients and/or the public were not involved in the design, or conduct, or  
39  
40 361 reporting, or dissemination plans of this research.

41  
42  
43 362 Provenance and peer review Not commissioned; externally peer reviewed.

44  
45 363 Acknowledgements: Thank my colleagues in general ICU for cooperating with us in our prospective  
46  
47  
48 364 study. Thanks to two public databases namely MIMIC and AmsterdamUMC for providing important  
49  
50 365 data. Thanks for all patient advisers.

51  
52  
53 366

54  
55  
56 367 **Supplemental Figure:**

57  
58 368 File name: **Figure S1.tif**  
59  
60

1  
2  
3  
4 369 Title and Description of data: The variable importance parameter histogram of early diagnosis prediction

5  
6 370 models of severe AKI uses a multiple logistic regression algorithm and five machine learning algorithms.

7  
8  
9 371 File name: **Figure S2.tif**

10  
11 372 Title and Description of data: The K-S curve used to determine the cut-off value of positive and negative

12  
13 373 diagnosis of early diagnosis prediction models of severe AKI.

14  
15  
16 374 File name: **Table S1.docx**

17  
18 375 Title and of Description data: Missing data between three databases in the study and values included in

19  
20 376 the model.

21  
22 377 File name: **Table S2.docx**

23  
24 378 Title and of Description data: Clinical Demographics and Outcomes of SHZJU-ICU patients in model

25  
26 379 building set and prospective validation.

27  
28 380 File name: **Table S3.docx**

29  
30 381 Title of data: TRIPOD Checklist of Prediction Model Development and Validation

31  
32 382 Description of data: Writing norms of this type of research.

33  
34 383

35  
36 384 **Figure Legend:**

37  
38 385 Figure 1: The research flow chart. The data collection time interval of the study was 7 days before

39  
40 386 diagnosis and the prediction interval was 48 hours. The early prediction model of AKI diagnosis was

41  
42 387 constructed and verified by our database and the MIMIC database and incorporated into the

43  
44 388 AmsterdamUMC database for external validation. We carried out a one-year prospective validation

45  
46 389 through the database of the centre.

47  
48 390 Figure 2: The AUROC curve of the internal validation set of the SHZJU-ICU database and the MIMIC

1  
2  
3  
4  
5  
6  
7  
8  
9  
10  
11  
12  
13  
14  
15  
16  
17  
18  
19  
20  
21  
22  
23  
24  
25  
26  
27  
28  
29  
30  
31  
32  
33  
34  
35  
36  
37  
38  
39  
40  
41  
42  
43  
44  
45  
46  
47  
48  
49  
50  
51  
52  
53  
54  
55  
56  
57  
58  
59  
60

391 database.

392 Figure 3: The AUROC curve of the external validation set of the AmsterdamUMC database for 3A and  
393 the prospective validation in our center for 3B.

For peer review only



338x451mm (300 x 300 DPI)



1  
2  
3  
4  
5  
6  
7  
8  
9  
10  
11  
12  
13  
14  
15  
16  
17  
18  
19  
20  
21  
22  
23  
24  
25  
26  
27  
28  
29  
30  
31  
32  
33  
34  
35  
36  
37  
38  
39  
40  
41  
42  
43  
44  
45  
46  
47  
48  
49  
50  
51  
52  
53  
54  
55  
56  
57  
58  
59  
60

Internal validation set ROC curves



External and prospective validation set ROC curves

A: AmsterdamUMC database external validation set

B: SHZJU-ICU database prospective validation set



**Supplemental Figure:**File name: **Figure S1.tif**

Title and Description of data: The variable importance parameter histogram of early diagnosis prediction models of severe AKI uses a multiple logistic regression algorithm and five machine learning algorithms.

File name: **Figure S2.tif**

Title and Description of data: The K-S curve used to determine the cut-off value of positive and negative diagnosis of early diagnosis prediction models of severe AKI.



For peer review only

File name: **Table S1.docx**

Title and of Description data: Missing data between three databases in the study and values included in the model.

|                           | SHZJU-ICU | MIMIC | AmsterdamUMC | Including in Model |
|---------------------------|-----------|-------|--------------|--------------------|
| <b>Age</b>                | √         | √     | √            | √                  |
| <b>Gender</b>             | √         | √     | √            | √                  |
| <b>Race</b>               | √         | √     | ×            | ×                  |
| <b>Primary disease</b>    | √         | √     | ×            | ×                  |
| <b>Comorbidity</b>        | √         | √     | ×            | ×                  |
| <b>Ventilation</b>        | √         | √     | √            | √                  |
| <b>Operation</b>          | √         | √     | ×            | ×                  |
| <b>ICU hours</b>          | √         | √     | √            | √                  |
| <b>Survived</b>           | √         | √     | √            | √                  |
| <b>Vital sign</b>         |           |       |              |                    |
| <b>Temperature</b>        | √         | √     | √            | √                  |
| <b>Systolic pressure</b>  | √         | √     | √            | √                  |
| <b>Diastolic pressure</b> | √         | √     | √            | √                  |
| <b>Respiratory rate</b>   | √         | √     | √            | √                  |
| <b>Heart rate</b>         | √         | √     | √            | √                  |
| <b>Oxygen saturation</b>  | √         | √     | √            | √                  |
| <b>Urine</b>              | √         | √     | √            | √                  |
| <b>GCS score</b>          | √         | ×     | ×            | ×                  |
| <b>Laboratory results</b> |           |       |              |                    |
| <b>Scr</b>                | √         | √     | √            | √                  |
| <b>BUN</b>                | √         | √     | √            | √                  |
| <b>RBC</b>                | √         | √     | √            | √                  |
| <b>MCV</b>                | √         | √     | √            | √                  |
| <b>Hb</b>                 | √         | √     | √            | √                  |
| <b>WBC</b>                | √         | √     | √            | √                  |
| <b>NEUT</b>               | √         | √     | √            | √                  |
| <b>PLT</b>                | √         | √     | √            | √                  |
| <b>HCV</b>                | √         | √     | ×            | ×                  |
| <b>TBLB</b>               | √         | √     | √            | √                  |
| <b>DBLB</b>               | √         | √     | √            | √                  |
| <b>IBLB</b>               | √         | √     | √            | √                  |
| <b>CRP</b>                | √         | √     | √            | √                  |
| <b>PCT</b>                | √         | ×     | ×            | ×                  |
| <b>Serum kalium</b>       | √         | √     | √            | √                  |
| <b>Serum natrium</b>      | √         | √     | √            | √                  |
| <b>Serum chlorine</b>     | √         | √     | √            | √                  |

|                   |   |   |   |   |
|-------------------|---|---|---|---|
| PT                | √ | √ | √ | √ |
| APTT              | √ | √ | √ | √ |
| INR               | √ | √ | √ | √ |
| CK                | √ | √ | √ | √ |
| LDH               | √ | √ | √ | √ |
| Troponin          | √ | √ | √ | √ |
| Blood glucose     | √ | √ | √ | √ |
| PH                | √ | √ | √ | √ |
| Lactic acid       | √ | √ | √ | √ |
| Anion gap         | √ | √ | √ | √ |
| ABC               | √ | √ | √ | √ |
| SBC               | √ | √ | √ | √ |
| PaCO <sub>2</sub> | √ | √ | √ | √ |
| PaO <sub>2</sub>  | √ | √ | √ | √ |

SHZJU-ICU: The general ICU database of the second affiliated hospital of Zhejiang university school of medicine; MIMIC: Medical Information Mart for Intensive Care; APTT: Activated partial thromboplastin time; INR: International normalized ratio; LDH: Lactate dehydrogenase; PaCO<sub>2</sub>: Partial pressure of carbon dioxide; PaO<sub>2</sub> Partial pressure of oxygen; MCV: Mean corpuscular volume; PH: Potential of hydrogen; WBC: White blood cell count; NEUT: Proportion of neutrophils; CK: Creatine kinase; Scr: Serum Creatinine; BUN: Blood urea nitrogen; RBC: Red blood cell count; Hb: Hemoglobin; PT: Prothrombin time; TBLB: Total bilirubin; DBLB: Direct bilirubin; IBLB: Indirect bilirubin; CRP: C-reactive protein; HCV: Hematocrit value; PCT: Procalcitonin; ABC: Actual Bicarbonate Radical; SBC: Standard Bicarbonate Radical; PLT: Platelet count

File name: **Table S2.docx**

Title and of Description data: Clinical Demographics and Outcomes of SHZJU-ICU patients in model

building set and prospective validation.

|                                                 | SHZJU-ICU<br>Negative<br>(N=5695) | SHZJU-ICU<br>Severe AKI<br>(N=766) | P-value | SHZJU-ICU<br>Prospective<br>Negative<br>(N=2188) | SHZJU-ICU<br>Prospective<br>Positive<br>(N=344) | P-value |
|-------------------------------------------------|-----------------------------------|------------------------------------|---------|--------------------------------------------------|-------------------------------------------------|---------|
| <b>Age, median [IQR]</b>                        | 60.5<br>[48.8-70.1]               | 62.1<br>[50.1-72.5]                | 0.004   | 61.3<br>[47.5-73.4]                              | 62.1<br>[51.2-70.5]                             | 0.03    |
| <b>Gender, male (%)</b>                         | 3561 (64.9)                       | 438 (59.8)                         | 0.007   | 1365 (62.4)                                      | 207 (60.2)                                      | 0.438   |
| <b>Race</b>                                     |                                   |                                    |         |                                                  |                                                 |         |
| <b>White</b>                                    | 3 (0.05)                          | 1 (0.1)                            | 1       | 2 (0.001)                                        | 0                                               | 1       |
| <b>Black</b>                                    | 1 (0.02)                          | 0                                  | 1       | 0                                                | 0                                               | 1       |
| <b>Asian</b>                                    | 5691(99.9)                        | 764 (99.7)                         | 1       | 2185 (99.9)                                      | 344(100)                                        | 1       |
| <b>Other</b>                                    | 0                                 | 1 (0.1)                            | 1       | 1 (0.001)                                        | 0                                               | 1       |
| <b>Admission Scr<br/>(mg/dL), mean<br/>(sd)</b> | 0.9 (0.34)                        | 1.0 (0.40)                         | <0.001  | 0.8 (0.32)                                       | 0.9 (0.35)                                      | <0.001  |
| <b>Admission BUN<br/>(mg/dL), mean<br/>(sd)</b> | 18 (11)                           | 21 (9)                             | <0.001  | 17 (11)                                          | 20 (10)                                         | 0.007   |
| <b>Cancer, n (%)</b>                            | 644 (11.3)                        | 48 (6.3)                           | <0.001  | 230 (10.5)                                       | 26 (7.6)                                        | 0.102   |
| <b>Cirrhosis, n (%)</b>                         | 43 (0.8)                          | 6 (0.8)                            | 0.89    | 15 (0.7)                                         | 3 (0.8)                                         | 0.726   |
| <b>Cardiopathy, n<br/>(%)</b>                   | 231 (4.1)                         | 42 (5.5)                           | 0.08    | 98 (4.5)                                         | 19 (5.7)                                        | 0.403   |
| <b>Diabetes, n (%)</b>                          | 305 (5.4)                         | 63 (8.2)                           | 0.002   | 142 (6.5)                                        | 29 (8.6)                                        | 0.203   |
| <b>Hypertension, n<br/>(%)</b>                  | 889 (15.6)                        | 115 (15.0)                         | 0.70    | 324(14.8)                                        | 56 (16.4)                                       | 0.466   |
| <b>Ventilation, n (%)</b>                       | 2569 (45.1)                       | 592 (77.3)                         | <0.001  | 1102 (50.4)                                      | 239 (69.5)                                      | <0.001  |
| <b>Operation, n (%)</b>                         | 3361 (59.1)                       | 373 (48.7)                         | <0.001  | 1234(56.4)                                       | 160 (46.7)                                      | 0.001   |
| <b>ICU Hours,<br/>median [IQR]</b>              | 50.8<br>[23.0-139.5]              | 164.4<br>[70.3-328.6]              | <0.001  | 58.7<br>[34.2-160.4]                             | 145.6<br>[68.5-314.8]                           | <0.001  |
| <b>Survived, n (%)</b>                          | 4997 (87.7)                       | 380 (49.6)                         | <0.001  | 1868 (85.4)                                      | 178 (51.9)                                      | <0.001  |

SHZJU-ICU: The general ICU database of the second affiliated hospital of Zhejiang university school of medicine; MIMIC: Medical Information Mart for Intensive Care; IQR: Inter-Quartile Range; ICU: Intensive Care Unit; AKI: Acute Kidney Injury. Scr: serum creatinine; BUN: blood urea nitrogen.

File name: **Table S3.docx**

Title of data: TRIPOD Checklist of Prediction Model Development and Validation

Description of data: Writing norms of this type of research.

| 1Section/Topic               | Checklist Item |     | Page                                                                                                                                                                                                        |
|------------------------------|----------------|-----|-------------------------------------------------------------------------------------------------------------------------------------------------------------------------------------------------------------|
| <b>Title and abstract</b>    |                |     |                                                                                                                                                                                                             |
| Title                        | 1              | Y;V | Identify the study as developing and/or validating a multivariable prediction model, the target population, and the outcome to be predicted.<br>Yes; P1                                                     |
| Abstract                     | 2              | Y;V | Provide a summary of objectives, study design, setting, participants, sample size, predictors, outcome, statistical analysis, results, and conclusions.<br>Yes; P2                                          |
| <b>Introduction</b>          |                |     |                                                                                                                                                                                                             |
| Background and objectives    | 3a             | Y;V | Explain the medical context (including whether diagnostic or prognostic) and rationale for developing or validating the multivariable prediction model, including references to existing models.<br>Yes; P3 |
|                              | 3b             | Y;V | Specify the objectives, including whether the study describes the development or validation of the model or both.<br>Yes; P4, L76-79                                                                        |
| <b>Methods</b>               |                |     |                                                                                                                                                                                                             |
| Source of data               | 4a             | Y;V | Describe the study design or source of data (e.g., randomized trial, cohort, or registry data), separately for the development and validation data sets, if applicable.<br>Yes; P4, L80                     |
|                              | 4b             | Y;V | Specify the key study dates, including start of accrual; end of accrual; and, if applicable, end of follow-up.<br>Yes; P4, L84-86                                                                           |
| Participants                 | 5a             | Y;V | Specify key elements of the study setting (e.g., primary care, secondary care, general population) including number and location of centres.<br>Yes                                                         |
|                              | 5b             | Y;V | Describe eligibility criteria for participants.<br>Yes; P5, L104                                                                                                                                            |
|                              | 5c             | Y;V | Give details of treatments received, if relevant.<br>NA                                                                                                                                                     |
| Outcome                      | 6a             | Y;V | Clearly define the outcome that is predicted by the prediction model, including how and when assessed.<br>Yes; P6, L111                                                                                     |
|                              | 6b             | Y;V | Report any actions to blind assessment of the outcome to be predicted.<br>NA                                                                                                                                |
| Predictors                   | 7a             | Y;V | Clearly define all predictors used in developing or validating the multivariable prediction model, including how and when they were measured.<br>Yes; P6, L116                                              |
|                              | 7b             | Y;V | Report any actions to blind assessment of predictors for the outcome and other predictors.<br>NA                                                                                                            |
| Sample size                  | 8              | Y;V | Explain how the study size was arrived at.<br>NA                                                                                                                                                            |
| Missing data                 | 9              | Y;V | Describe how missing data were handled (e.g., complete-case analysis, single imputation, multiple imputation) with details of any imputation method.<br>Yes; P6, L127                                       |
| Statistical analysis methods | 10a            | D   | Describe how predictors were handled in the analyses.<br>Yes; P6, L116                                                                                                                                      |
|                              | 10b            | D   | Specify type of model, all model-building procedures (including any predictor selection), and method for internal validation.<br>Yes; P6, L119                                                              |
|                              | 10c            | V   | For validation, describe how the predictions were calculated.<br>Yes; P6, L126                                                                                                                              |
|                              | 10d            | Y;V | Specify all measures used to assess model performance and, if relevant, to compare multiple models.<br>Yes; P6, L159                                                                                        |



|                            |    |     |                                                                                                                                                                                                       |                   |
|----------------------------|----|-----|-------------------------------------------------------------------------------------------------------------------------------------------------------------------------------------------------------|-------------------|
|                            | 0e | V   | Describe any model updating (e.g., recalibration) arising from the validation, if done.                                                                                                               | NA                |
| Risk groups                | 11 | P;V | Provide details on how risk groups were created, if done.                                                                                                                                             | Yes; P6, L111     |
| Development vs. validation | 12 | V   | For validation, identify any differences from the development data in setting, eligibility criteria, outcome, and predictors.                                                                         | Yes; P6, L132     |
| <b>Results</b>             |    |     |                                                                                                                                                                                                       |                   |
| Participants               | 3a | P;V | Describe the flow of participants through the study, including the number of participants with and without the outcome and, if applicable, a summary of the follow-up time. A diagram may be helpful. | Yes; Figure 1     |
|                            | 3b | P;V | Describe the characteristics of the participants (basic demographics, clinical features, available predictors), including the number of participants with missing data for predictors and outcome.    | Yes, P8, L168-180 |
|                            | 3c | V   | For validation, show a comparison with the development data of the distribution of important variables (demographics, predictors and outcome).                                                        | Yes, Table2       |
| Model development          | 4a | D   | Specify the number of participants and outcome events in each analysis.                                                                                                                               | Yes, P8, L168     |
|                            | 4b | D   | If done, report the unadjusted association between each candidate predictor and outcome.                                                                                                              | Yes               |
| Model specification        | 5a | D   | Present the full prediction model to allow predictions for individuals (i.e., all regression coefficients, and model intercept or baseline survival at a given time point).                           | Yes.              |
|                            | 5b | D   | Explain how to use the prediction model.                                                                                                                                                              | Yes, P9, L196     |
| Model performance          | 16 | P;V | Report performance measures (with CIs) for the prediction model.                                                                                                                                      | Yes, P9, L190     |
| Model-updating             | 17 | V   | If done, report the results from any model updating (i.e., model specification, model performance).                                                                                                   | NA                |
| <b>Discussion</b>          |    |     |                                                                                                                                                                                                       |                   |
| Limitations                | 18 | P;V | Discuss any limitations of the study (such as nonrepresentative sample, few events per predictor, missing data).                                                                                      | Yes, P12, L236    |
| Interpretation             | 9a | V   | For validation, discuss the results with reference to performance in the development data, and any other validation data.                                                                             | Yes, P11, L217    |
|                            | 9b | P;V | Give an overall interpretation of the results, considering objectives, limitations, results from similar studies, and other relevant evidence.                                                        | Yes, P10 L198     |
| Implications               | 20 | P;V | Discuss the potential clinical use of the model and implications for future research.                                                                                                                 | Yes, P9, L193     |
| <b>Other information</b>   |    |     |                                                                                                                                                                                                       |                   |
| Supplementary information  | 21 | P;V | Provide information about the availability of supplementary resources, such as study protocol, Web calculator, and data sets.                                                                         | Yes               |
| Funding                    | 22 | P;V | Give the source of funding and the role of the funders for the present study.                                                                                                                         | NA                |

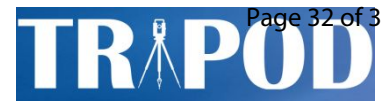

TRIPOD Checklist: Prediction Model Development and Validation

| 1Section/Topic               | Item |     | Checklist Item                                                                                                                                                                                        | Page                            |
|------------------------------|------|-----|-------------------------------------------------------------------------------------------------------------------------------------------------------------------------------------------------------|---------------------------------|
| <b>Title and abstract</b>    |      |     |                                                                                                                                                                                                       |                                 |
| Title                        | 1    | D;V | Identify the study as developing and/or validating a multivariable prediction model, the target population, and the outcome to be predicted.                                                          | Yes; P1                         |
| Abstract                     | 2    | D;V | Provide a summary of objectives, study design, setting, participants, sample size, predictors, outcome, statistical analysis, results, and conclusions.                                               | Yes; P2                         |
| <b>Introduction</b>          |      |     |                                                                                                                                                                                                       |                                 |
| Background and objectives    | 3a   | D;V | Explain the medical context (including whether diagnostic or prognostic) and rationale for developing or validating the multivariable prediction model, including references to existing models.      | Yes; P3                         |
|                              | 3b   | D;V | Specify the objectives, including whether the study describes the development or validation of the model or both.                                                                                     | Yes; P4, L76-79                 |
| <b>Methods</b>               |      |     |                                                                                                                                                                                                       |                                 |
| Source of data               | 4a   | D;V | Describe the study design or source of data (e.g., randomized trial, cohort, or registry data), separately for the development and validation data sets, if applicable.                               | Yes; P4, L83-92                 |
|                              | 4b   | D;V | Specify the key study dates, including start of accrual; end of accrual; and, if applicable, end of follow-up.                                                                                        | Yes; P4, L83-100                |
| Participants                 | 5a   | D;V | Specify key elements of the study setting (e.g., primary care, secondary care, general population) including number and location of centres.                                                          | Yes                             |
|                              | 5b   | D;V | Describe eligibility criteria for participants.                                                                                                                                                       | Yes; P4, L103                   |
|                              | 5c   | D;V | Give details of treatments received, if relevant.                                                                                                                                                     | NA                              |
| Outcome                      | 6a   | D;V | Clearly define the outcome that is predicted by the prediction model, including how and when assessed.                                                                                                | Yes; P6, L111                   |
|                              | 6b   | D;V | Report any actions to blind assessment of the outcome to be predicted.                                                                                                                                | NA                              |
| Predictors                   | 7a   | D;V | Clearly define all predictors used in developing or validating the multivariable prediction model, including how and when they were measured.                                                         | Yes; P6, L116                   |
|                              | 7b   | D;V | Report any actions to blind assessment of predictors for the outcome and other predictors.                                                                                                            | NA                              |
| Sample size                  | 8    | D;V | Explain how the study size was arrived at.                                                                                                                                                            | NA                              |
| Missing data                 | 9    | D;V | Describe how missing data were handled (e.g., complete-case analysis, single imputation, multiple imputation) with details of any imputation method.                                                  | Yes; P6, L127                   |
| Statistical analysis methods | 10a  | D   | Describe how predictors were handled in the analyses.                                                                                                                                                 | Yes; P6, L125                   |
|                              | 10b  | D   | Specify type of model, all model-building procedures (including any predictor selection), and method for internal validation.                                                                         | Yes; P6, L130-138               |
|                              | 10c  | V   | For validation, describe how the predictions were calculated.                                                                                                                                         | Yes; P6, L139                   |
|                              | 10d  | D;V | Specify all measures used to assess model performance and, if relevant, to compare multiple models.                                                                                                   | Yes; P7, L159                   |
|                              | 10e  | V   | Describe any model updating (e.g., recalibration) arising from the validation, if done.                                                                                                               | Yes; P7, L137                   |
| Risk groups                  | 11   | D;V | Provide details on how risk groups were created, if done.                                                                                                                                             | Yes; P6, L111                   |
| Development vs. validation   | 12   | V   | For validation, identify any differences from the development data in setting, eligibility criteria, outcome, and predictors.                                                                         | Yes; P6, L132                   |
| <b>Results</b>               |      |     |                                                                                                                                                                                                       |                                 |
| Participants                 | 13a  | D;V | Describe the flow of participants through the study, including the number of participants with and without the outcome and, if applicable, a summary of the follow-up time. A diagram may be helpful. | Yes; Figure 1                   |
|                              | 13b  | D;V | Describe the characteristics of the participants (basic demographics, clinical features, available predictors), including the number of participants with missing data for predictors and outcome.    | Yes, P8, L168-180 and SupTable2 |
|                              | 13c  | V   | For validation, show a comparison with the development data of the distribution of important variables (demographics, predictors and outcome).                                                        | Yes, SupTable3                  |
| Model development            | 14a  | D   | Specify the number of participants and outcome events in each analysis.                                                                                                                               | Yes, P8, L168                   |
|                              | 14b  | D   | If done, report the unadjusted association between each candidate predictor and outcome.                                                                                                              | Yes, SupTable1                  |
| Model specification          | 15a  | D   | Present the full prediction model to allow predictions for individuals (i.e., all regression coefficients, and model intercept or baseline survival at a given time point).                           | Yes.                            |
|                              | 15b  | D   | Explain how to use the prediction model.                                                                                                                                                              | Yes, P9, L196                   |
| Model performance            | 16   | D;V | Report performance measures (with CIs) for the prediction model.                                                                                                                                      | Yes, P9, L190                   |
| Model-updating               | 17   | V   | If done, report the results from any model updating (i.e., model specification, model performance).                                                                                                   | NA                              |
| <b>Discussion</b>            |      |     |                                                                                                                                                                                                       |                                 |
| Limitations                  | 18   | D;V | Discuss any limitations of the study (such as nonrepresentative sample, few events per predictor, missing data).                                                                                      | Yes, P12, L246                  |
| Interpretation               | 19a  | V   | For validation, discuss the results with reference to performance in the development data, and any other validation data.                                                                             | Yes, P11, L237                  |
|                              | 19b  | D;V | Give an overall interpretation of the results, considering objectives, limitations, results from similar studies, and other relevant evidence.                                                        | Yes, P10 L210-245               |
| Implications                 | 20   | D;V | Discuss the potential clinical use of the model and implications for future research.                                                                                                                 | Yes, P12, L254                  |
| <b>Other information</b>     |      |     |                                                                                                                                                                                                       |                                 |
| Supplementary information    | 21   | D;V | Provide information about the availability of supplementary resources, such as study protocol, Web calculator, and data sets.                                                                         | Yes                             |
| Funding                      | 22   | D;V | Give the source of funding and the role of the funders for the present study.                                                                                                                         | NA                              |

\*Items relevant only to the development of a prediction model are denoted by D, items relating solely to a validation of a prediction model are denoted by V, and items relating to both are denoted D;V. We recommend using the TRIPOD Checklist in conjunction with the TRIPOD Explanation and Elaboration document.

# BMJ Open

## Severe Acute Kidney Injury Predicting Model based on transcontinental databases: a single-center prospective study

|                                 |                                                                                                                                                                                                                                                                                                                                                                                                                                                                                                          |
|---------------------------------|----------------------------------------------------------------------------------------------------------------------------------------------------------------------------------------------------------------------------------------------------------------------------------------------------------------------------------------------------------------------------------------------------------------------------------------------------------------------------------------------------------|
| Journal:                        | <i>BMJ Open</i>                                                                                                                                                                                                                                                                                                                                                                                                                                                                                          |
| Manuscript ID                   | bmjopen-2021-054092.R4                                                                                                                                                                                                                                                                                                                                                                                                                                                                                   |
| Article Type:                   | Original research                                                                                                                                                                                                                                                                                                                                                                                                                                                                                        |
| Date Submitted by the Author:   | 04-Feb-2022                                                                                                                                                                                                                                                                                                                                                                                                                                                                                              |
| Complete List of Authors:       | Liang, Qiqiang; Zhejiang University School of Medicine Second Affiliated Hospital<br>Xu, Yongfeng; Zhejiang University School of Medicine Second Affiliated Hospital<br>Zhou, Yu; Zhejiang University School of Medicine Second Affiliated Hospital<br>Chen, Xinyi; Zhejiang University School of Medicine Second Affiliated Hospital<br>Chen, Juan; Zhejiang University School of Medicine Second Affiliated Hospital<br>Huang, Man; Zhejiang University School of Medicine Second Affiliated Hospital, |
| <b>Primary Subject Heading</b>: | Intensive care                                                                                                                                                                                                                                                                                                                                                                                                                                                                                           |
| Secondary Subject Heading:      | Diagnostics                                                                                                                                                                                                                                                                                                                                                                                                                                                                                              |
| Keywords:                       | Acute renal failure < NEPHROLOGY, INTENSIVE & CRITICAL CARE, Information technology < BIOTECHNOLOGY & BIOINFORMATICS, Adult intensive & critical care < INTENSIVE & CRITICAL CARE                                                                                                                                                                                                                                                                                                                        |
|                                 |                                                                                                                                                                                                                                                                                                                                                                                                                                                                                                          |

SCHOLARONE™  
Manuscripts

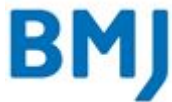

I, the Submitting Author has the right to grant and does grant on behalf of all authors of the Work (as defined in the below author licence), an exclusive licence and/or a non-exclusive licence for contributions from authors who are: i) UK Crown employees; ii) where BMJ has agreed a CC-BY licence shall apply, and/or iii) in accordance with the terms applicable for US Federal Government officers or employees acting as part of their official duties; on a worldwide, perpetual, irrevocable, royalty-free basis to BMJ Publishing Group Ltd ("BMJ") its licensees and where the relevant Journal is co-owned by BMJ to the co-owners of the Journal, to publish the Work in this journal and any other BMJ products and to exploit all rights, as set out in our [licence](#).

The Submitting Author accepts and understands that any supply made under these terms is made by BMJ to the Submitting Author unless you are acting as an employee on behalf of your employer or a postgraduate student of an affiliated institution which is paying any applicable article publishing charge ("APC") for Open Access articles. Where the Submitting Author wishes to make the Work available on an Open Access basis (and intends to pay the relevant APC), the terms of reuse of such Open Access shall be governed by a Creative Commons licence – details of these licences and which [Creative Commons](#) licence will apply to this Work are set out in our licence referred to above.

Other than as permitted in any relevant BMJ Author's Self Archiving Policies, I confirm this Work has not been accepted for publication elsewhere, is not being considered for publication elsewhere and does not duplicate material already published. I confirm all authors consent to publication of this Work and authorise the granting of this licence.

1  
2  
3  
4 **1 Severe Acute Kidney Injury Predicting Model based on transcontinental**  
5  
6 **2 databases: a single-center prospective study**  
7  
8

9 **3** Qiqiang Liang<sup>1</sup>; Yongfeng Xu<sup>1</sup>; Yu Zhou<sup>2</sup>; Xinyi Chen<sup>2</sup>, MM; Juan Chen<sup>2</sup>; Man Huang<sup>1\*</sup>  
10

11 **4** General Intensive Care Unit, Second Affiliated Hospital of Zhejiang University School of Medicine, Hangzhou,  
12  
13  
14 **5** China.  
15

16  
17 **6** \*Corresponding author: Man Huang, MD PhD.  
18

19 **7** Department: General Intensive Care Unit  
20

21  
22 **8** Hospital: Second Affiliated Hospital of Zhejiang University School of Medicine  
23

24  
25 **9** Address: No. 1511, Jianghong Road, Bingjiang District, Hangzhou City, Zhejiang Province  
26

27 **10** Tel: + 86 571 89713427  
28

29  
30 **11** Fax: + 86 571 89713427  
31

32 **12** E-mail: [huangman@zju.edu.cn](mailto:huangman@zju.edu.cn).  
33

34  
35 **13** ORCID: 0000-0002-0842-2254  
36  
37  
38  
39  
40  
41  
42  
43  
44  
45  
46  
47  
48  
49  
50  
51  
52  
53  
54  
55  
56  
57  
58  
59  
60

1  
2  
3  
4 **23 Abstract:**

5  
6 **24 Objectives:** There are many studies of acute kidney injury (AKI) diagnosis models lack of external  
7  
8  
9 **25 validation and prospective validation.** We constructed the models using three databases to predict severe  
10  
11  
12 **26 AKI within 48 hours in intensive care unit (ICU) patients.**

13  
14 **27 Design:** A retrospective and prospective cohort study.

15  
16  
17 **28 Setting:** We studied critically ill patients in our database (SHZJU-ICU) and two other public databases,  
18  
19  
20 **29 the Medical Information Mart for Intensive Care (MIMIC) and AmsterdamUMC databases, including**  
21  
22 **30 basic demographics, vital signs, and laboratory results.** We predicted the diagnosis of severe AKI in  
23  
24  
25 **31 patients in the next 48 hours using machine-learning algorithms with the three databases.** Then, we  
26  
27  
28 **32 carried out real-time severe AKI prediction in the prospective validation study at our center for one year.**

29  
30 **33 Participants:** All patients included in three databases with uniform exclusion criteria.

31  
32 **34 Primary and secondary outcome measures:** Effect evaluation index of prediction models.

33  
34  
35 **35 Results:** We included 58492 patients, and a total of 5257 (9.0%) patients met the definition of severe  
36  
37  
38 **36 AKI.** In the internal validation of the SHZJU-ICU and MIMIC databases, the best area under the receiver  
39  
40  
41 **37 operating characteristic curve (AUROC) of the model was 0.86.** The external validation results by  
42  
43  
44 **38 AmsterdamUMC database were also satisfactory, with the best AUROC of 0.86.** A total of 2532 patients  
45  
46  
47 **39 were admitted to the center for prospective validation; 358 positive results were predicted, and 344**  
48  
49  
50 **40 patients were diagnosed with severe AKI, with the best sensitivity of 0.72, the specificity of 0.80, and**  
51  
52  
53 **41 the AUROC of 0.84.**

54  
55  
56 **42 Conclusion:** The prediction model of severe AKI exhibits promises as a clinical application based on  
57  
58  
59 **43 dynamic vital signs and laboratory results of multi-center databases with prospective and external**  
60  
**44 validation.**

1  
2  
3  
4 45 **Keywords:** Machine learning; Acute kidney injury; Real-time prospective validation; External  
5  
6 46 validation.

7  
8  
9 47 **Strengths and limitations of this study:**

10  
11 48 A prospective validation in machine learning of AKI research rather than other studies;

12  
13 49 Three large database containing different national populations and regions;

14  
15 50 Variable's sampling limited by the monitoring frequency of clinical data;

16  
17 51 Differences in the samples proportion of three databases;

18  
19 52 The dimensions of variables are not rich enough.

20  
21 53 **Data sharing statement:** No data available.

22  
23 54

24  
25 55 **Introduction:**

26  
27 56 Acute kidney injury (AKI), as a common clinical complication in the intensive care unit (ICU),

28  
29 57 significantly increases the duration of hospitalization and mortality[1]. AKI is divided into three types

30  
31 58 according to the various aetiologies: prerenal (renal hypoperfusion), intrarenal (vascular, glomerular, or

32  
33 59 tubulointerstitial lesions), and postrenal (urinary tract obstruction)[2]. Although nearly all diseases

34  
35 60 associated with ICU admission may cause AKI, acute tubular necrosis (ATN) and prerenal azotaemia

36  
37 61 are the most common causes[3].

38  
39 62 All AKI diagnostic criteria including the latest Kidney Disease: Improving Global Outcomes (KDIGO)

40  
41 63 standard are currently based on the creatinine level and urine volume[4]. However, the increase in the

42  
43 64 creatinine level or decrease in the urine volume lags the onset of AKI[2]. Many studies have suggested

44  
45 65 that early diagnosis and treatment of reversible AKI can reduce mortality[5]. Therefore, the creatinine

46  
47 66 level and urine volume are not satisfactory to meet clinical diagnostic demands. Consequently, many

1  
2  
3  
4 67 researchers have tried to develop an early warning model by analysing the risk factors for AKI[6].  
5  
6 68 Patient complications, such as diabetes, hypertension, cardiovascular disease, chronic liver disease,  
7  
8  
9 69 sepsis, and trauma, are identified as important risk factors for AKI[7]. The AKI prediction model and  
10  
11 70 scoring system developed based on high-risk factors has gradually become the focus of research  
12  
13  
14 71 considering the lower clinical application threshold compared with that of new biomarkers[6]. Although  
15  
16  
17 72 most previous prediction models use the multiple logistic regression model, a variety of AKI prediction  
18  
19 73 models based on machine learning have resulted in satisfactory outcomes[6]. Since the first AKI  
20  
21  
22 74 prediction model study based on artificial intelligence was published in 2016, researchers have built more  
23  
24  
25 75 than 20 published AKI prediction models successively by using local or multi-centre databases[6,8-14].  
26  
27 76 The results indicate that these models can predict the occurrence of AKI and the need for renal  
28  
29  
30 77 replacement therapy (RRT) within 24 or 48 hours, with accuracies ranging from 81% to 97%[6,15]. In  
31  
32  
33 78 addition, many studies have focused on subspecialized conditions, including cardiac surgery, trauma,  
34  
35  
36 79 and burns[14-16]. However, the common defect in these studies is the lack of external validation and  
37  
38  
39 80 prospective validation, which causes the prediction model to deviate from the clinical scenarios and limits  
40  
41  
42 81 extrapolation beyond the scope of the data.

43 82 In this study, we built models to predict AKI within 48 hours in critically ill patients by using  
44  
45  
46 83 transcontinental three databases. Then, we evaluated the clinical effect of the model through a one-year  
47  
48  
49 84 prospective validation at our centre.

50  
51 85

## 52 53 86 **Methods:**

### 54 55 56 87 **Study design and setting**

57  
58 88 We collected patients using three ICU databases and prospectively validated the models in our centre.  
59  
60



1  
2  
3  
4 89 The first database was our centre general ICU database (SHZJU-ICU) of the Second Affiliated Hospital  
5  
6 90 of Zhejiang University School of Medicine, an academic teaching hospital. Since its establishment in  
7  
8  
9 91 2017, it has included 12000 ICU patients' data and is updated daily. The Medical Information Mart for  
10  
11 92 Intensive Care (MIMIC) III database, the second one, is an open ICU database provided by the  
12  
13 93 Massachusetts Institute of Technology and includes nearly 60000 ICU patients from North America[17].  
14  
15  
16 94 Lastly, the AmsterdamUMC database is an available European ICU database with health data related to  
17  
18  
19 95 23000 patients admitted to ICUs in parts of Europe[18]. The research flow chart is shown in Figure 1.  
20  
21  
22 96

### 97 **Study definition**

26  
27 98 In this study, the diagnosis of AKI was confirmed based on three stages according to the KDIGO  
28  
29  
30 99 criteria[4]. We defined the patients who met the KDIGO AKI II and III criteria as severe AKI groups  
31  
32  
33 100 and the others as negative groups. We excluded patients with lack of creatinine measurements during  
34  
35 101 admission, patients with creatinine baseline more than 3.0 mg/dL at admission, patients who met severe  
36  
37 102 AKI diagnosis within 24 hours, and patients who used RRT within 48 hours after admission[19]. In  
38  
39  
40 103 addition, we excluded pregnant women, patients younger than 14 years old, and patients hospitalized in  
41  
42 104 the ICU for fewer than 48 hours. After the patient was admitted to ICU, we performed a prediction every  
43  
44 105 24 hours and recorded a prediction time. If the patient was diagnosed with severe AKI within 48 hours,  
45  
46 106 the predictive time was defined as a positive predictive point, and the others were defined as a negative  
47  
48  
49 107 point. The study was evaluated and approved by the Ethics Committee of the Second Affiliated Hospital  
50  
51  
52 108 of Zhejiang University School of Medicine as study number 2019-078.

### 55 109 **Data Collection**

56  
57  
58 110 The variables included demographic data, vital signs, basic and primary diseases, laboratory results,  
59  
60

1  
2  
3  
4 111 important operation records, and drug records. Comorbidity included hypertension, diabetes, cardiopathy,  
5  
6 112 liver disease, and malignant tumors. The primary disease was the main cause of admission to the ICU  
7  
8  
9 113 following the ICD-10 codes. The vital signs and clinical laboratory results were transformed into  
10  
11 114 different variables according to the average, variance, maximum, minimum, and final value before  
12  
13  
14 115 diagnosis. We use a method similar to the forward incremental method in the multivariate logic  
15  
16  
17 116 regression model, that is, the combination of embedded feature selection and forward addition for feature  
18  
19 117 selection. First of all, all variables are trained in the model, then list by variables importance. variables  
20  
21  
22 118 are added to the model one by one according to the variable importance. a variable is retained if it causes  
23  
24  
25 119 the AUC growth to be greater than 0.01, otherwise delete it. We transformed the MIMIC and  
26  
27 120 AmsterdamUMC databases according to our centre database structure, unifying the unit and diagnostic  
28  
29  
30 121 codes. We deleted variables missing more than 50%. Variables missing more than 30% but less than 50%  
31  
32 122 are listed to clinicians who determine the potential correlation between these variables and AKI. We  
33  
34  
35 123 carry out multiple interpolation for these variables which clinicians require to be retained, and the others  
36  
37  
38 124 deleted. Variables missing less than 30% are fill in multiple interpolation. All Missing data between three  
39  
40 125 databases and values included in the model shown in supplementation file Table S1.

#### 42 43 126 **Model construction and external validation**

44  
45 127 The ratio of the training and internal validation sets was 4:1. The SHZJU and MIMIC databases  
46  
47  
48 128 training sets were mixed into a new training set. There were more negative data than positive data, so we  
49  
50  
51 129 randomly sampled the negative datasets and constructed a new data subset with a sampling ratio of  
52  
53 130 positive and negative data of 1:5 in model building in order to extract the importance variables. In the  
54  
55  
56 131 subsequent model validation, we adopted the original data set. We used multiple logistic regression,  
57  
58 132 random forest, XGBoost, AdaBoost, LightGBoost, gradient boosting decision tree (GBDT), and debug  
59  
60

1  
2  
3  
4 133 to assess the variables and model-related parameters by the fivefold cross-validation method. After the  
5  
6 134 models were built, we used the SHZJU-ICU and MIMIC test sets for internal validation of the model and  
7  
8  
9 135 the AmsterdamUMC database for external validation. The most appropriate cut-off value was determined  
10  
11  
12 136 according to the K-S curve. The prediction model represents the results of each prediction with a  
13  
14  
15 137 probability between 0 to 1.0. We define results more than 0.4 as high-risk, that is, positive results, and  
16  
17  
18 138 the rest as negative results. Through internal validation and external validation, we calibrated the model  
19  
20  
21 139 by adjusting the super-parameters and using the Platt calibration algorithm and compared the calibration  
22  
23  
24 140 effect by drawing a reliability diagram. All model building and validation processes were performed in  
25  
26  
27 141 Python 3.6.

#### 27 142 **Prospective validation**

28  
29  
30 143 The prospective research period was 2020.01.01 to 2020.12.31. We collected real-time data when  
31  
32  
33 144 patients were admitted to the ICU, transformed the data according to the requirements, and formed a  
34  
35  
36 145 complete sample for the prediction model after passing the integrity test. We had established a  
37  
38  
39 146 visualization scheme and allowed researchers to review the predictions daily. The daily prediction results  
40  
41  
42 147 were not publicly accessible during the study to avoid affecting clinicians' decisions, but the diagnosis  
43  
44  
45 148 results were available to the researchers as visual graphics. We sampled the 20% predicted data every  
46  
47  
48 149 month and deleted samples with more than 50% missing values to ensure data correctness. When a patient  
49  
50  
51 150 has the following conditions, AKI prediction system will end the patient's prospective prediction: A. a  
52  
53  
54 151 positive diagnosis; B. Transfer out of ICU or death with negative diagnosis. All diagnosis of severe AKI  
55  
56  
57 152 needs to be reviewed by two ICU attending physicians independently, and if the they have different  
58  
59  
60 153 opinion, the third one will be appealed.

#### 58 154 **Statistical analysis:**

1  
2  
3  
4 155 The population characteristics were reported as the medians and inter-quartile ranges (IQRs) for  
5  
6 156 skewed data and the means and standard deviations for normally distributed data. The independent  
7  
8  
9 157 sample T-test was used for normally distributed data, and the rank-sum test was used for the rest.  
10  
11  
12 158 Dichotomous variables were assessed by the chi-square test, and a P value less than 0.05 was considered  
13  
14 159 statistically significant. The non-normally distributed data were analyzed by exponential transformation  
15  
16  
17 160 and logarithmic transformation. The effect of the model was evaluated by parameters such as the  
18  
19  
20 161 AUROC, accuracy, specificity, and F1-score.

#### 22 162 **Patient and Public Involvement:**

23  
24  
25 163 The information of cases in three databases was in a state of complete desensitization in the process  
26  
27 164 of building the model. During the prospective study, all the patients signed an informed consent form at  
28  
29  
30 165 the beginning of admission to ICU. The real-time data discussed and used by only the study members,  
31  
32  
33 166 and were not made public during the study period. All data were anonymized before the authors accessed  
34  
35 167 them for the purpose of this study. Therefore, patients' priorities, experience, and preferences will not  
36  
37  
38 168 affect the development of the research question and outcome measures. If necessary, we will inform  
39  
40 169 patients of relevant research results by telephone.

42  
43 170

#### 45 171 **Results:**

46  
47  
48 172 According to the inclusion criteria and exclusion criteria, we selected 58492 patients from three  
49  
50 173 databases who met the requirements of the study, including 6461 patients from the SHZJU-ICU database,  
51  
52  
53 174 36690 patients from the MIMIC database, and 15341 patients from the AmsterdamUMC database. A  
54  
55  
56 175 total of 5257 (9.0%) patients met the definition of severe AKI (11.8% in SHZJU-ICU, 7.6% in MIMIC,  
57  
58  
59 176 and 10.9% in AmsterdamUMC). The distributions of age and sex in the three centers were similar, but  
60

177 the differences in race were large. Asian patients accounted for more than 99% in the SHZJU-ICU  
 178 database, and only approximately 2.5% in the MIMIC database. White people accounted for more than  
 179 70% of the MIMIC database. In addition, patients from the MIMIC database had a higher incidence of  
 180 the tumor, liver cirrhosis, diabetes, and hypertension. Patients in the AmsterdamUMC and SHZJU-ICU  
 181 databases had a higher proportion of mechanical ventilation and overall survival rate. Severe AKI  
 182 patients had longer ICU hospital stays and higher mortality. More details are presented in Table 1.  
 183 Table 1: Clinical Demographics and Outcomes in patients with or without severe acute  
 184 kidney injury.

|                                  | SHZJU-ICU<br>Negative<br>(N=5695) | SHZJU-ICU<br>Severe AKI<br>(N=766) | P-<br>valu<br>e | MIMIC<br>Negative<br>(N=33879) | MIMIC<br>Severe AKI<br>(N=2811) | P-<br>value | AmsterdamUMC<br>Negative<br>(N=13661) | AmsterdamUMC<br>severe AKI<br>(N=1680) | P-<br>value |
|----------------------------------|-----------------------------------|------------------------------------|-----------------|--------------------------------|---------------------------------|-------------|---------------------------------------|----------------------------------------|-------------|
| Age, median [IQR]                | 60.5<br>[48.8-70.1]               | 62.1<br>[50.1-72.5]                | 0.00<br>4       | 62.0<br>[45.0-76.0]            | 64.0<br>[52.0-76.0]             | <0.001      | 64.5<br>[54.5,74.5]                   | 64.3<br>[52.5,78.5]                    | 0.04        |
| Gender, male (%)                 | 3561 (64.9)                       | 438 (59.8)                         | 0.00<br>7       | 18976 (56.0)                   | 1524 (54.2)                     | 0.06        | 8920 (65.3)                           | 1054 (63.9)                            | 0.03        |
| Race                             |                                   |                                    |                 |                                |                                 |             | /                                     | /                                      | /           |
| White                            | 3 (0.05)                          | 1 (0.1)                            | 1               | 23796 (70.2)                   | 2005 (71.3)                     | 0.23        | /                                     | /                                      | /           |
| Black                            | 1 (0.02)                          | 0                                  | 1               | 2455 (7.2)                     | 199 (7.1)                       | 0.45        | /                                     | /                                      | /           |
| Asian                            | 5691(99.9)                        | 764 (99.7)                         | 1               | 918 (2.7)                      | 70 (2.5)                        | 0.54        | /                                     | /                                      | /           |
| Other                            | 0                                 | 1 (0.1)                            | 1               | 6710 (19.8)                    | 537 (19.1)                      | 0.34        | /                                     | /                                      | /           |
| Admission Scr (mg/dL), mean (sd) | 0.9 (0.34)                        | 1.0 (0.40)                         | <0.0<br>01      | 1.1 (0.41)                     | 1.1 (0.50)                      | 0.04        | 1.2 (0.35)                            | 1.1 (0.38)                             | <0.00<br>1  |
| Admission BUN (mg/dL), mean (sd) | 18 (11)                           | 21 (9)                             | <0.0<br>01      | 17 (12)                        | 23 (12)                         | <0.001      | 18 (13)                               | 23 (10)                                | <0.00<br>1  |
| Cancer, n (%)                    | 644 (11.3)                        | 48 (6.3)                           | <0.0<br>01      | 6652 (19.6)                    | 752 (26.8)                      | <0.001      | /                                     | /                                      | /           |
| Cirrhosis, n (%)                 | 43 (0.8)                          | 6 (0.8)                            | 0.89            | 1180 (3.5)                     | 426 (15.2)                      | <0.001      | /                                     | /                                      | /           |
| Cardiopathy, n (%)               | 231 (4.1)                         | 42 (5.5)                           | 0.08            | 4840 (14.3)                    | 336 (12.0)                      | 0.001       | /                                     | /                                      | /           |
| Diabetes, n (%)                  | 305 (5.4)                         | 63 (8.2)                           | 0.00<br>2       | 7250 (21.4)                    | 789 (28.1)                      | <0.001      | /                                     | /                                      | /           |
| Hypertension, n (%)              | 889 (15.6)                        | 115 (15.0)                         | 0.70            | 16328 (48.2)                   | 1513 (53.8)                     | <0.001      | /                                     | /                                      | /           |
| Ventilation, n (%)               | 2569 (45.1)                       | 592 (77.3)                         | <0.0<br>01      | 13009 (38.4)                   | 1503(53.5)                      | <0.001      | 7718(56.5)                            | 1248(74.3)                             | <0.00<br>1  |

1  
2  
3  
4  
5  
6  
7  
8  
9  
10

|                                |                   |                    |        |                   |                    |        |                  |                    |        |
|--------------------------------|-------------------|--------------------|--------|-------------------|--------------------|--------|------------------|--------------------|--------|
| <b>Operation, n (%)</b>        | 3361 (59.1)       | 373 (48.7)         | <0.001 | 12455 (36.7)      | 1430 (50.8)        | <0.001 | /                | /                  | /      |
| <b>ICU Hours, median [IQR]</b> | 50.8 [23.0-139.5] | 164.4 [70.3-328.6] | <0.001 | 51.0 [28.5-110.3] | 103.4 [50.1-261.3] | <0.001 | 24.0 [19.8,63.5] | 142.0 [45.4,394.2] | <0.001 |
| <b>Survived, n (%)</b>         | 4997 (87.7)       | 380 (49.6)         | <0.001 | 25648 (75.7)      | 1356 (48.2)        | <0.001 | 10942(80.1)      | 1033 (61.5)        | <0.001 |

11  
12  
13  
14  
15  
16  
17  
18  
19  
20  
21  
22  
23  
24  
25  
26  
27  
28  
29  
30  
31  
32  
33  
34  
35  
36  
37  
38  
39  
40  
41  
42  
43  
44  
45  
46  
47  
48  
49  
50  
51  
52

185 SHZJU-ICU: The general ICU database of the second affiliated hospital of Zhejiang university  
186 school of medicine; MIMIC: Medical Information Mart for Intensive Care; IQR: Inter-Quartile  
187 Range; ICU: Intensive Care Unit; AKI: Acute Kidney Injury. Scr: serum creatinine; BUN: blood  
188 urea nitrogen.

189 There were significant differences in the important parameters of the variables among the different  
190 models (see Figure S1). However, the trend of the creatinine level in the past week was still an important  
191 variable, followed by urine volume, blood urea nitrogen level, temperature, and length of ICU stay. The  
192 cut-off value used to distinguish between a negative and positive prediction was determined by the K-S  
193 curve, with value of 0.423 (see Figure S2). The GBDT model had the best prediction effect in the test  
194 set, followed by XGBoost and LightGBoost. In the two central internal validation sets, the two best-  
195 performing machine learning algorithms with great AUROC are LightGBoost (SHZJU-ICU of 83.2%,  
196 MIMIC of 86.0%) and XGBoost (SHZJU-ICU 85.9%, MIMIC 85.6%), as detailed in Figure 2. Overall,  
197 the sensitivity (SHZJU-ICU 0.84, MIMIC 0.83) and the negative predictive value (SHZJU-ICU 0.90,  
198 MIMIC 0.90) of the predictive model were high, but the specificity was general (SHZJU-ICU 0.79,  
199 MIMIC 0.75), as shown in Table 2. In the external validation based on AmsterdamUMC database, the  
200 overall model validation effect results were satisfactory, and XGBoost had the best performance, with  
201 an AUROC of 0.84, as shown in Figure 2 and Table 2.

202

203 Table 2: Model validation results by three databases with machine learning algorithm

| Model                                              | AUROC | Accuracy | Sensitivity | Specificity | PPV   | NPV   | F1    |
|----------------------------------------------------|-------|----------|-------------|-------------|-------|-------|-------|
| <b>Internal validation with SHZJU-ICU database</b> |       |          |             |             |       |       |       |
| <b>Logistic regression</b>                         | 0.748 | 0.662    | 0.834       | 0.576       | 0.496 | 0.874 | 0.622 |
| <b>LightGBoost</b>                                 | 0.832 | 0.741    | 0.839       | 0.692       | 0.576 | 0.896 | 0.683 |

10

|                                                       |              |       |       |       |       |       |       |
|-------------------------------------------------------|--------------|-------|-------|-------|-------|-------|-------|
| <b>GBDT</b>                                           | 0.845        | 0.765 | 0.843 | 0.725 | 0.606 | 0.902 | 0.705 |
| <b>AdaBoost</b>                                       | 0.806        | 0.721 | 0.824 | 0.67  | 0.555 | 0.884 | 0.663 |
| <b>Random Forest</b>                                  | 0.821        | 0.763 | 0.71  | 0.789 | 0.627 | 0.845 | 0.666 |
| <b>XGBoost</b>                                        | <b>0.859</b> | 0.779 | 0.81  | 0.763 | 0.631 | 0.889 | 0.709 |
| <b>Internal validation with MIMIC database</b>        |              |       |       |       |       |       |       |
| <b>Logistic regression</b>                            | 0.733        | 0.695 | 0.643 | 0.72  | 0.535 | 0.801 | 0.584 |
| <b>LightGBost</b>                                     | <b>0.86</b>  | 0.768 | 0.822 | 0.741 | 0.613 | 0.893 | 0.702 |
| <b>GBDT</b>                                           | 0.846        | 0.765 | 0.786 | 0.755 | 0.616 | 0.876 | 0.691 |
| <b>AdaBoost</b>                                       | 0.837        | 0.732 | 0.831 | 0.683 | 0.567 | 0.89  | 0.674 |
| <b>Random Forest</b>                                  | 0.832        | 0.738 | 0.791 | 0.712 | 0.578 | 0.872 | 0.668 |
| <b>XGBoost</b>                                        | 0.856        | 0.758 | 0.833 | 0.721 | 0.598 | 0.895 | 0.695 |
| <b>External validation with AmsterdamUMC database</b> |              |       |       |       |       |       |       |
| <b>Logistic regression</b>                            | 0.704        | 0.767 | 0.516 | 0.893 | 0.706 | 0.787 | 0.596 |
| <b>LightGBost</b>                                     | 0.859        | 0.763 | 0.827 | 0.731 | 0.606 | 0.894 | 0.7   |
| <b>GBDT</b>                                           | 0.861        | 0.764 | 0.84  | 0.727 | 0.606 | 0.901 | 0.704 |
| <b>AdaBoost</b>                                       | 0.85         | 0.755 | 0.813 | 0.726 | 0.597 | 0.886 | 0.689 |
| <b>Random Forest</b>                                  | 0.82         | 0.743 | 0.77  | 0.729 | 0.587 | 0.864 | 0.666 |
| <b>XGBoost</b>                                        | <b>0.865</b> | 0.75  | 0.873 | 0.688 | 0.584 | 0.916 | 0.7   |
| <b>Prospective validation with SHZJU-ICU</b>          |              |       |       |       |       |       |       |
| <b>Logistic regression</b>                            | 0.758        | 0.772 | 0.648 | 0.834 | 0.662 | 0.826 | 0.655 |
| <b>LightGBost</b>                                     | 0.819        | 0.796 | 0.596 | 0.895 | 0.74  | 0.816 | 0.66  |
| <b>GBDT</b>                                           | 0.827        | 0.781 | 0.706 | 0.818 | 0.66  | 0.848 | 0.683 |
| <b>AdaBoost</b>                                       | 0.808        | 0.766 | 0.686 | 0.805 | 0.638 | 0.837 | 0.661 |
| <b>Random Forest</b>                                  | 0.804        | 0.755 | 0.715 | 0.775 | 0.613 | 0.845 | 0.66  |
| <b>XGBoost</b>                                        | <b>0.841</b> | 0.779 | 0.724 | 0.807 | 0.652 | 0.854 | 0.686 |

204 AUROC: Area Under Receiver Operating Characteristic; PPV: Positive Predictive Value; NPV:  
 205 Negative Predictive Value; SHZJU-ICU: The general ICU database of the second affiliated  
 206 hospital of Zhejiang university school of medicine; MIMIC: Medical Information Mart for  
 207 Intensive Care; GBDT: Gradient Boosted Decision Tree.

208

209 According to the inclusion and exclusion criteria, we delete 267 patients among 94 patients with  
 210 creatinine baseline more than 3.0 mg/dL at admission, 39 patients met severe AKI diagnosis within 24  
 211 hours, and 26 patients who used RRT within 48 hours after admission, 108 patients hospitalized in the  
 212 ICU for fewer than 48 hours. A total of 2532 patients were admitted to our centre for prospective  
 213 validation, and the prediction model made 16858 times predictions. In the prospective cohort, there was  
 214 no significant difference in age, gender, baseline creatinine and urea nitrogen, and complications. The

1  
2  
3  
4 215 proportion of mechanical ventilation and the ICU stay time in AKI patients were longer with higher  
5  
6 216 mortality. Above all, there was no significant difference between the prospective and the retrospective  
7  
8  
9 217 cohort. More detail sees in supplementation file Table S2. In the end, 358 positive results were predicted,  
10  
11 218 and the rest were negative results. There are 344 patients with severe AKI were diagnosed and the  
12  
13  
14 219 prediction accuracy was 83.5%. The model with the highest area under the curve was XGBoost, 0.84  
15  
16  
17 220 with the best sensitivity of 0.72, the specificity of 0.80. The results of the prospective study are similar  
18  
19 221 to those of the external validation of the model, and are relatively stable. More detail is presented in  
20  
21  
22 222 Figure 3 and Table 2.  
23  
24  
25 223

#### 27 224 **Discussion:**

29  
30 225 In this study, we built predictive models by machine learning to predict the incidence of severe AKI  
31  
32 226 with three databases in different regions and in the next 48 hours. After internal and external validation,  
33  
34  
35 227 prospective validation over one year was carried out to verify the model effects. The three databases  
36  
37  
38 228 come from three countries that are in Asia, Europe, and North America, which proves that the model is  
39  
40 229 universal to some extent.

41  
42  
43 230 Despite the huge amount of data, many databases are still not suitable for prospective research  
44  
45 231 because they are not updated promptly. Tomasev, N and colleagues have provided research on AKI  
46  
47  
48 232 prediction models with a large amount of data[10]. The study covered 703782 adult patients with 6 billion  
49  
50  
51 233 individual items, including 620000 elements. In this study, a depth neural network model was used for  
52  
53 234 real-time prediction. A total of 55.8% of severe AKI patients were predicted within the first 48 hours,  
54  
55  
56 235 although each accurate prediction was accompanied by two mispredictions[10]. This study provided a  
57  
58  
59 236 new scheme for real-time prediction and indicated that we should prospectively evaluate and  
60



1  
2  
3  
4 237 independently validate models to explore their effectiveness. In a prospective study, Flechet, M et al  
5  
6 238 compared an AKI prediction model with clinicians in 252 patients and found that the clinical effect of  
7  
8  
9 239 the random forest model for predicting AKI-II/III was equivalent to that of clinicians. Our prediction  
10  
11 240 model graphical visualization of the model was installed in the centre's database for better usage. In  
12  
13  
14 241 addition, our database is updated daily to achieve daily predictions and present the results to researchers.  
15  
16  
17 242 In the prospective validation of our study, the stability of the prediction model confirmed its promise,  
18  
19 243 which provides a basis for future research.

20  
21  
22 244 There are many studies of artificial intelligence for predicting the occurrence of AKI, but most of them  
23  
24 245 are single-centre studies, and the extrapolation effect has been controversial. In 2016, Koyner, J, and his  
25  
26  
27 246 colleague published the first study of an AKI prediction model based on multi-centre data. In all 202961  
28  
29 247 patients, 17541 (8.6%) had AKI, 4251 (3.5%) had AKI-II, and 1242 (0.6%) had AKI-III. A multivariate  
30  
31 248 logistic regression model was used to predict AKI in this study with an AUROC of 0.74 (95% CI=0.74).  
32  
33 249 With the classification of AKI, the AUROC of the prediction model gradually increased to 0.84[8].  
34  
35  
36 250 Subsequently, the study team used a new machine learning algorithm, to build a more accurate model to  
37  
38 251 predict the occurrence of AKI-II, with an AUROC of 0.9 within 24 hours and 0.87 within 48 hours[19].  
39  
40  
41 252 Recently, the research team included data from two other centres, namely, LUMC (N=200613) and NUS  
42  
43 253 (N=246895), to externally validate the AKI-II prediction model with AUROCs reaching 0.85 to 0.86,  
44  
45  
46 254 suggesting that the artificial intelligence model has stable predictive ability[12]. This series of studies  
47  
48  
49 255 included many data points, suggesting the feasibility of artificial intelligence in the diagnosis of AKI,  
50  
51  
52 256 but the proportion of positive patients (3.5%) and ICU patients (30%) was too low to properly predict  
53  
54  
55 257 AKI. Our research is similar to the above. The SAHZJU-ICU database is a single-centre database  
56  
57  
58 258 representing south-eastern China, and the MIMIC database is a well-known open ICU database in the  
59  
60

1  
2  
3  
4 259 United States. The AmsterdamUMC database is a public database located in Europe. The population  
5  
6 260 structure and diseases in the three databases are complete but different in the distribution of complications  
7  
8  
9 261 and race. Therefore, it provides a prediction model with unparalleled stability compared with other  
10  
11  
12 262 studies.

13  
14 263

15  
16  
17 264 **Limitations:**

18  
19 265 This retrospective multi-centre study was unable to carry out more clinical feature mining and  
20  
21  
22 266 comparison because of different data structures. The differences between the three databases partly  
23  
24  
25 267 reflect some demographic differences between Europe, the United States and China, resulting in a decline  
26  
27  
28 268 in the accuracy of the prediction model. There are some differences in the number of patients included  
29  
30  
31 269 in the three databases, which may affect the choice of variables. As a result of the study design, we  
32  
33  
34 270 deleted patients with ICU hospitalization of less than 48 hours, which may result in the exclusion of most  
35  
36  
37 271 relatively mild patients and may reduce false positives. Second, in the prospective data study in 2020,  
38  
39  
40 272 there may be deviations in the inclusion of patients in the centre, thus affecting the interpretation of the  
41  
42  
43 273 follow-up prospective results. Finally, given the low incidence of severe AKI and the great difference in  
44  
45  
46 274 the proportion of positive and negative samples, the data may be accidental. Our model seems to be  
47  
48  
49 275 superior to diagnostic non-AKI patients rather than AKI because of the proportion of positive data that  
50  
51  
52 276 we include. In the retrospective study, we reduced the proportion of negative data by randomization but  
53  
54  
55 277 retain all data in prospective phase with the sensitivity decreases.

56  
57 278

58  
59 279 **Conclusion:**

60 280 Based on databases of patients of different races from different countries, we constructed stable

1  
2  
3  
4 281 machine learning models to predict the occurrence of AKI in the next 48 hours. Prospective validation  
5  
6 282 through the implementation of an updated local database is an effective exploration of further research.  
7  
8

9 283

10  
11 284 Data sharing statement: No data available.  
12  
13

14 285 Ethics approval: Our research was approved by the ethics committee of the Second Affiliated Hospital  
15  
16  
17 286 of Zhejiang University School of Medicine.  
18

19 287 Competing interests for authors: There may be some potential competing interests between our  
20  
21  
22 288 research and “HealSci Technology Co. Beijing.”. In this study, we jointly complete the work including  
23  
24  
25 289 data integration and transcoding in model construction and model visualization projects based on contract.  
26

27 290  
28  
29

30 291 **Reference:**

- 31  
32 292 1. Ronco, C.; Bellomo, R.; Kellum, J.A. Acute kidney injury. *The Lancet* **2019**, *394*, 1949-  
33  
34 293 1964, doi:10.1016/s0140-6736(19)32563-2.  
35  
36  
37 294 2. Pakula, A.M.; Skinner, R.A. Acute Kidney Injury in the Critically Ill Patient: A Current  
38  
39  
40 295 Review of the Literature. *J Intensive Care Med* **2016**, *31*, 319-324,  
41  
42 296 doi:10.1177/0885066615575699.  
43  
44  
45 297 3. Bellomo, R.; Kellum, J.A.; Ronco, C. Acute kidney injury. *The Lancet* **2012**, *380*, 756-  
46  
47  
48 298 766, doi:10.1016/s0140-6736(11)61454-2.  
49  
50  
51 299 4. Khwaja, A. KDIGO clinical practice guidelines for acute kidney injury. *Nephron Clin*  
52  
53 300 *Pract* **2012**, *120*, c179-184, doi:10.1159/000339789.  
54  
55  
56 301 5. Coelho, S.; Cabral, G.; Lopes, J.A.; Jacinto, A. Renal regeneration after acute kidney  
57  
58 302 injury. *Nephrology (Carlton)* **2018**, *23*, 805-814, doi:10.1111/nep.13256.  
59  
60

- 1  
2  
3  
4 303 6. Wilson, F.P.; Greenberg, J.H. Acute Kidney Injury in Real Time: Prediction, Alerts, and  
5  
6 304 Clinical Decision Support. *Nephron* **2018**, *140*, 116-119, doi:10.1159/000492064.  
7  
8  
9 305 7. Wu, Y.; Hao, W.; Chen, Y.; Chen, S.; Liu, W.; Yu, F.; Hu, W.; Liang, X. Clinical features,  
10  
11 306 risk factors, and clinical burden of acute kidney injury in older adults. *Ren Fail* **2020**,  
12  
13 307 *42*, 1127-1134, doi:10.1080/0886022X.2020.1843491.  
14  
15  
16 308 8. Koyner, J.L.; Adhikari, R.; Edelson, D.P.; Churpek, M.M. Development of a Multicenter  
17  
18 309 Ward-Based AKI Prediction Model. *Clin J Am Soc Nephrol* **2016**, *11*, 1935-1943,  
19  
20 310 doi:10.2215/CJN.00280116.  
21  
22  
23 311 9. Low, S.; Vathsala, A.; Murali, T.M.; Pang, L.; MacLaren, G.; Ng, W.Y.; Haroon, S.;  
24  
25 312 Mukhopadhyay, A.; Lim, S.L.; Tan, B.H., et al. Electronic health records accurately  
26  
27 313 predict renal replacement therapy in acute kidney injury. *BMC Nephrol* **2019**, *20*, 32,  
28  
29 314 doi:10.1186/s12882-019-1206-4.  
30  
31  
32 315 10. Tomasev, N.; Glorot, X.; Rae, J.W.; Zielinski, M.; Askham, H.; Saraiva, A.; Mottram, A.;  
33  
34 316 Meyer, C.; Ravuri, S.; Protsyuk, I., et al. A clinically applicable approach to continuous  
35  
36 317 prediction of future acute kidney injury. *Nature* **2019**, *572*, 116-119,  
37  
38 318 doi:10.1038/s41586-019-1390-1.  
39  
40  
41 319 11. Flechet, M.; Falini, S.; Bonetti, C.; Güiza, F.; Schetz, M.; Van den Berghe, G.; Meyfroidt,  
42  
43 320 G. Machine learning versus physicians' prediction of acute kidney injury in critically ill  
44  
45 321 adults: a prospective evaluation of the AKIpredictor. *Critical Care* **2019**, *23*, 282,  
46  
47 322 doi:10.1186/s13054-019-2563-x.  
48  
49  
50 323 12. Churpek, M.M.; Carey, K.A.; Edelson, D.P.; Singh, T.; Astor, B.C.; Gilbert, E.R.;  
51  
52 324 Winslow, C.; Shah, N.; Afshar, M.; Koyner, J.L. Internal and External Validation of a  
53  
54  
55  
56  
57  
58  
59  
60

- 1  
2  
3  
4 325 Machine Learning Risk Score for Acute Kidney Injury. *JAMA Netw Open* **2020**, *3*,  
5  
6 326 e2012892, doi:10.1001/jamanetworkopen.2020.12892.  
7  
8  
9 327 13. Yuan, Q.; Zhang, H.; Deng, T.; Tang, S.; Yuan, X.; Tang, W.; Xie, Y.; Ge, H.; Wang,  
10  
11 328 X.; Zhou, Q., et al. Role of Artificial Intelligence in Kidney Disease. *Int J Med Sci* **2020**,  
12  
13 329 *17*, 970-984, doi:10.7150/ijms.42078.  
14  
15  
16 330 14. Li, Y.; Xu, J.; Wang, Y.; Zhang, Y.; Jiang, W.; Shen, B.; Ding, X. A novel machine  
17  
18 331 learning algorithm, Bayesian networks model, to predict the high-risk patients with  
19  
20 332 cardiac surgery-associated acute kidney injury. *Clin Cardiol* **2020**, *43*, 752-761,  
21  
22 333 doi:10.1002/clc.23377.  
23  
24  
25 334 15. De Vlieger, G.; Kashani, K.; Meyfroidt, G. Artificial intelligence to guide management  
26  
27 335 of acute kidney injury in the ICU: a narrative review. *Curr Opin Crit Care* **2020**, *26*, 563-  
28  
29 336 573, doi:10.1097/MCC.0000000000000775.  
30  
31  
32 337 16. James, M.T.; Pannu, N.; Hemmelgarn, B.R.; Austin, P.C.; Tan, Z.; McArthur, E.; Manns,  
33  
34 338 B.J.; Tonelli, M.; Wald, R.; Quinn, R.R., et al. Derivation and External Validation of  
35  
36 339 Prediction Models for Advanced Chronic Kidney Disease Following Acute Kidney Injury.  
37  
38 340 *JAMA* **2017**, *318*, 1787-1797, doi:10.1001/jama.2017.16326.  
39  
40  
41 341 17. Johnson, A.E.; Pollard, T.J.; Shen, L.; Lehman, L.W.; Feng, M.; Ghassemi, M.; Moody,  
42  
43 342 B.; Szolovits, P.A.-O.; Celi, L.A.; Mark, R.A.-O. MIMIC-III, a freely accessible critical  
44  
45 343 care database.  
46  
47  
48 344 18. Thorat, P.J.; Peppink, J.M.; Driessen, R.H.; Sijbrands, E.J.G.; Kompanje, E.J.O.;  
49  
50 345 Kaplan, L.; Bailey, H.; Kesecioglu, J.; Cecconi, M.; Churpek, M., et al. Sharing ICU  
51  
52 346 Patient Data Responsibly Under the Society of Critical Care Medicine/European  
53  
54  
55  
56  
57  
58  
59  
60

- 1  
2  
3  
4 347 Society of Intensive Care Medicine Joint Data Science Collaboration: The Amsterdam  
5  
6 348 University Medical Centers Database (AmsterdamUMCdb) Example. *Crit Care Med*  
7  
8  
9 349 **2021**, 10.1097/CCM.0000000000004916, doi:10.1097/CCM.0000000000004916.  
10  
11  
12 350 19. Koyner, J.L.; Carey, K.A.; Edelson, D.P.; Churpek, M.M. The Development of a  
13  
14 351 Machine Learning Inpatient Acute Kidney Injury Prediction Model. *Crit Care Med* **2018**,  
15  
16  
17 352 *46*, 1070-1077, doi:10.1097/CCM.00000000000003123.  
18  
19  
20  
21  
22

23  
24  
25  
26  
27  
28  
29  
30  
31  
32  
33  
34  
35  
36  
37  
38  
39  
40  
41  
42  
43  
44  
45  
46  
47  
48  
49  
50  
51  
52  
53  
54  
55  
56  
57  
58  
59  
60

354 **Footnotes**

355 Contributions: Conceptualization, QL and MH; Methodology, YX; Software, YX; Validation, YZ, and  
356 YX.; Formal Analysis, JC and XC; Resources, MH; Data Curation, QL; Writing – Original Draft  
357 Preparation, QL; Writing – Review & Editing, MH; Visualization, YX; Supervision, YZ and QL; Project  
358 Administration, QL;

359 **Funding:** This research received no specific grant from any funding agency in the public, commercial  
360 or not-for-profit sectors.

361 Conflicts of Interest: There may be some potential competing interests between our research and  
362 “HealSci Technology Co. Beijing.”. In this study, we jointly complete the work including data integration  
363 and transcoding in model construction and model visualization projects based on contract.

364 Patient and public involvement Patients and/or the public were not involved in the design, or conduct, or  
365 reporting, or dissemination plans of this research.

366 Provenance and peer review Not commissioned; externally peer reviewed.

367 Acknowledgements: Thank my colleagues in general ICU for cooperating with us in our prospective  
368 study. Thanks to two public databases namely MIMIC and AmsterdamUMC for providing important

1  
2  
3  
4 369 data. Thanks for all patient advisers.  
5

6 370  
7  
8

9 371 **Supplemental Figure:**

10  
11 372 File name: **Figure S1.tif**

12  
13  
14 373 Title and Description of data: The variable importance parameter histogram of early diagnosis prediction  
15  
16 374 models of severe AKI uses a multiple logistic regression algorithm and five machine learning algorithms.

17  
18  
19 375 File name: **Figure S2.tif**

20  
21  
22 376 Title and Description of data: The K-S curve used to determine the cut-off value of positive and negative  
23  
24 377 diagnosis of early diagnosis prediction models of severe AKI.

25  
26  
27 378 File name: **Table S1.docx**

28  
29  
30 379 Title and of Description data: Missing data between three databases in the study and values included in  
31  
32 380 the model.

33  
34  
35 381 File name: **Table S2.docx**

36  
37  
38 382 Title and of Description data: Clinical Demographics and Outcomes of SHZJU-ICU patients in model  
39  
40 383 building set and prospective validation.

41  
42  
43 384

44  
45 385 **Figure Legend:**

46  
47  
48 386 Figure 1: The research flow chart. The data collection time interval of the study was 7 days before  
49  
50 387 diagnosis and the prediction interval was 48 hours. The early prediction model of AKI diagnosis was  
51  
52 388 constructed and verified by our database and the MIMIC database and incorporated into the  
53  
54 389 AmsterdamUMC database for external validation. We carried out a one-year prospective validation  
55  
56  
57 390 through the database of the centre.  
58  
59  
60

1  
2  
3  
4  
5  
6  
7  
8  
9  
10  
11  
12  
13  
14  
15  
16  
17  
18  
19  
20  
21  
22  
23  
24  
25  
26  
27  
28  
29  
30  
31  
32  
33  
34  
35  
36  
37  
38  
39  
40  
41  
42  
43  
44  
45  
46  
47  
48  
49  
50  
51  
52  
53  
54  
55  
56  
57  
58  
59  
60

391 Figure 2: The AUROC curve of the internal validation set of the SHZJU-ICU database and the MIMIC  
392 database.

393 Figure 3: The AUROC curve of the external validation set of the AmsterdamUMC database for 3A and  
394 the prospective validation in our center for 3B.

For peer review only



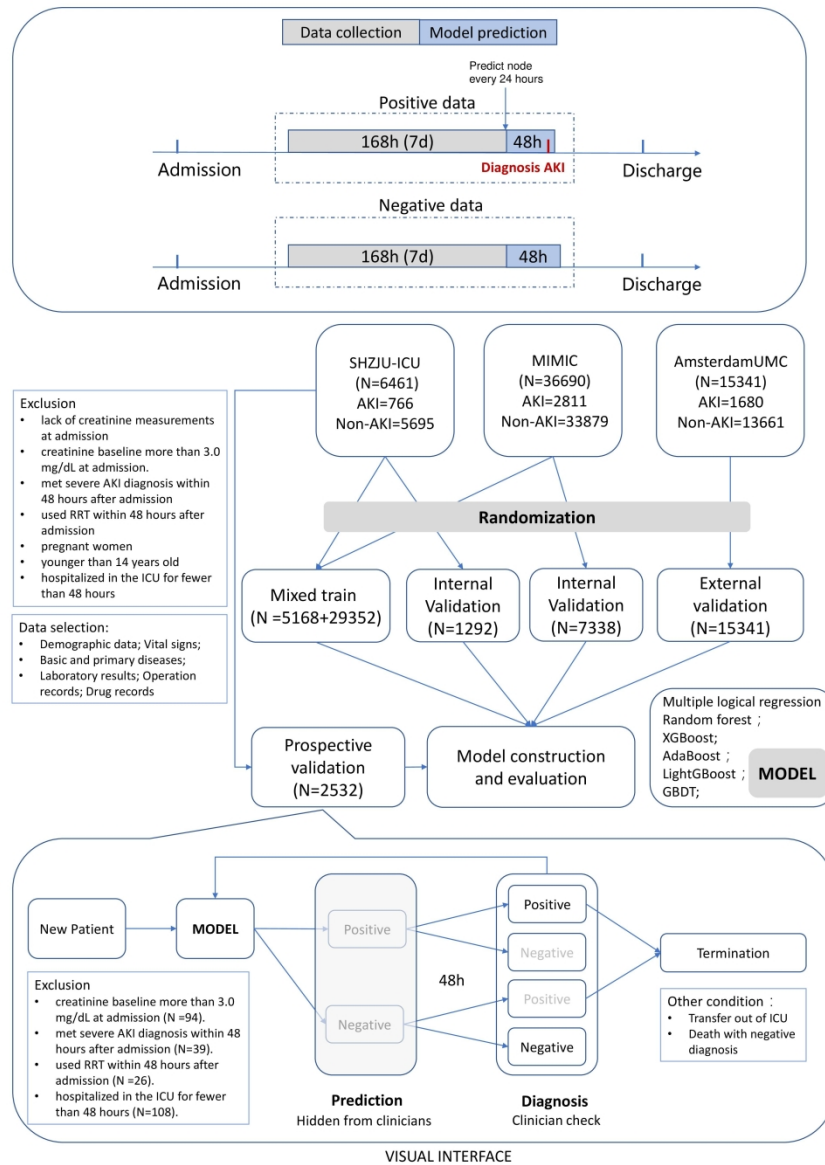

Figure 1: The research flow chart. The data collection time interval of the study was 7 days before diagnosis and the prediction interval was 48 hours. The early prediction model of AKI diagnosis was constructed and verified by our database and the MIMIC database and incorporated into the AmsterdamUMC database for external validation. We carried out a one-year prospective validation through the database of the centre.

338x451mm (300 x 300 DPI)

1  
2  
3  
4  
5  
6  
7  
8  
9  
10  
11  
12  
13  
14  
15  
16  
17  
18  
19  
20  
21  
22  
23  
24  
25  
26  
27  
28  
29  
30  
31  
32  
33  
34  
35  
36  
37  
38  
39  
40  
41  
42  
43  
44  
45  
46  
47  
48  
49  
50  
51  
52  
53  
54  
55  
56  
57  
58  
59  
60

Internal validation set ROC curves



Figure 2: The AUROC curve of the internal validation set of the SHZJU-ICU database and the MIMIC database.

External and prospective validation set ROC curves

A: AmsterdamUMC database external validation set      B: SHZJU-ICU database prospective validation set

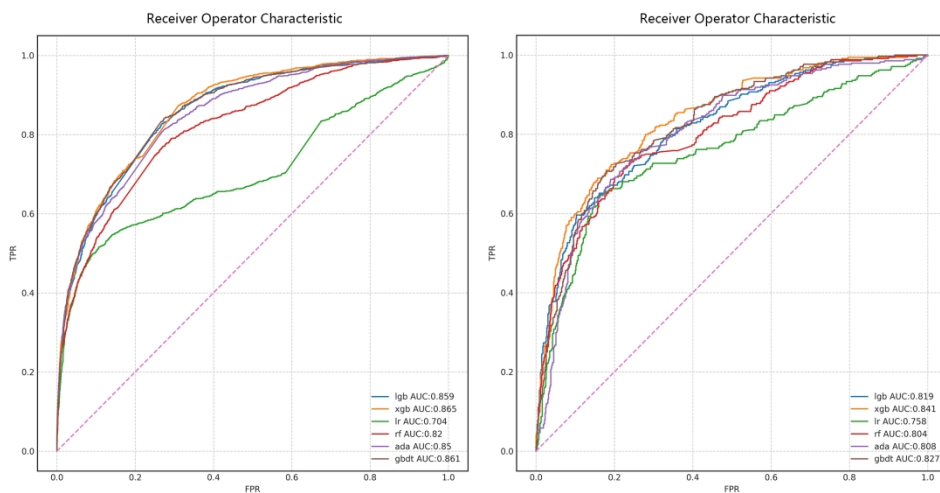

Figure 3: The AUROC curve of the external validation set of the AmsterdamUMC database for 3A and the prospective validation in our center for 3B.

1  
2  
3  
4 **Supplemental Figure:**

5  
6  
7 File name: **Figure S1.tif**

8  
9 Title and Description of data: The variable importance parameter histogram of early diagnosis prediction

10  
11 models of severe AKI uses a multiple logistic regression algorithm and five machine learning algorithms.

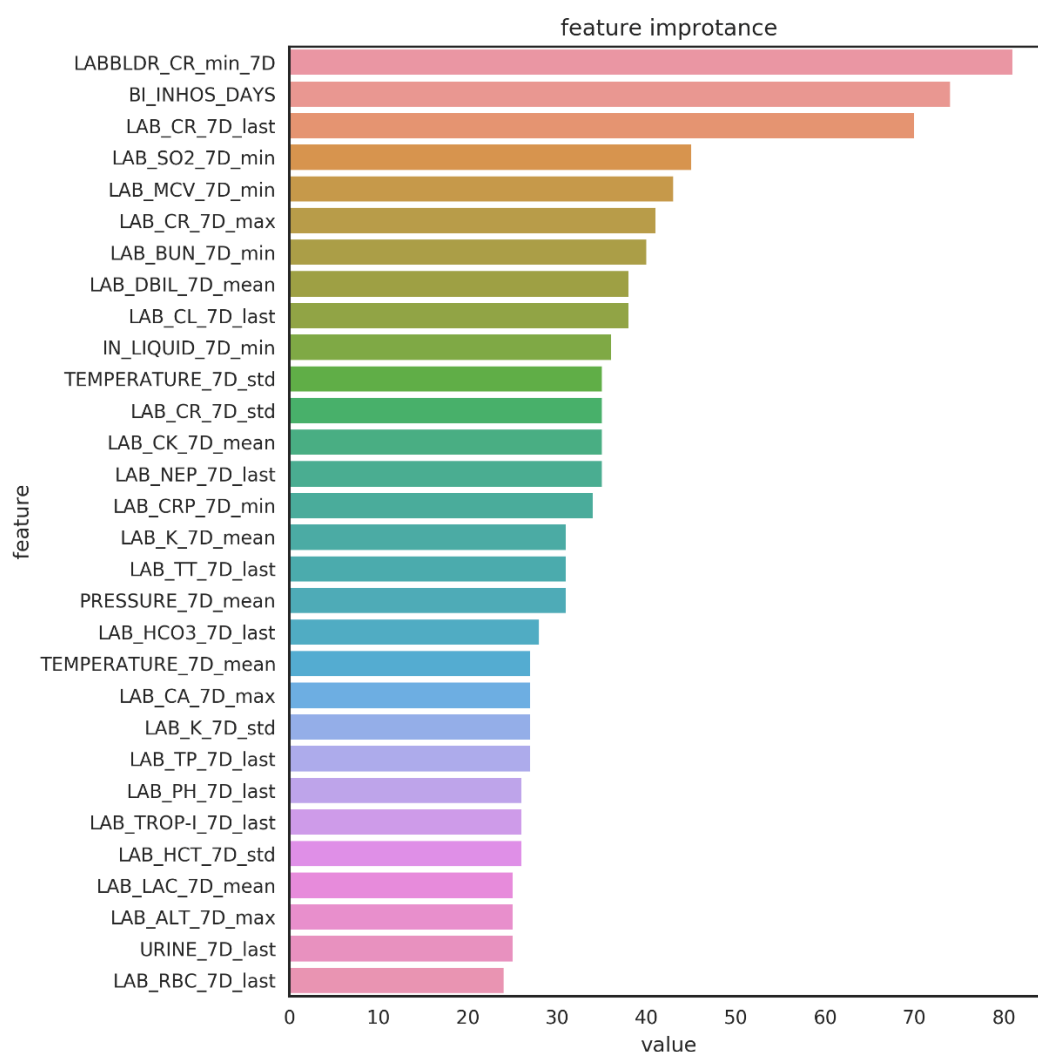

File name: **Figure S2.tif**

Title and Description of data: The K-S curve used to determine the cut-off value of positive and negative

diagnosis of early diagnosis prediction models of severe AKI.

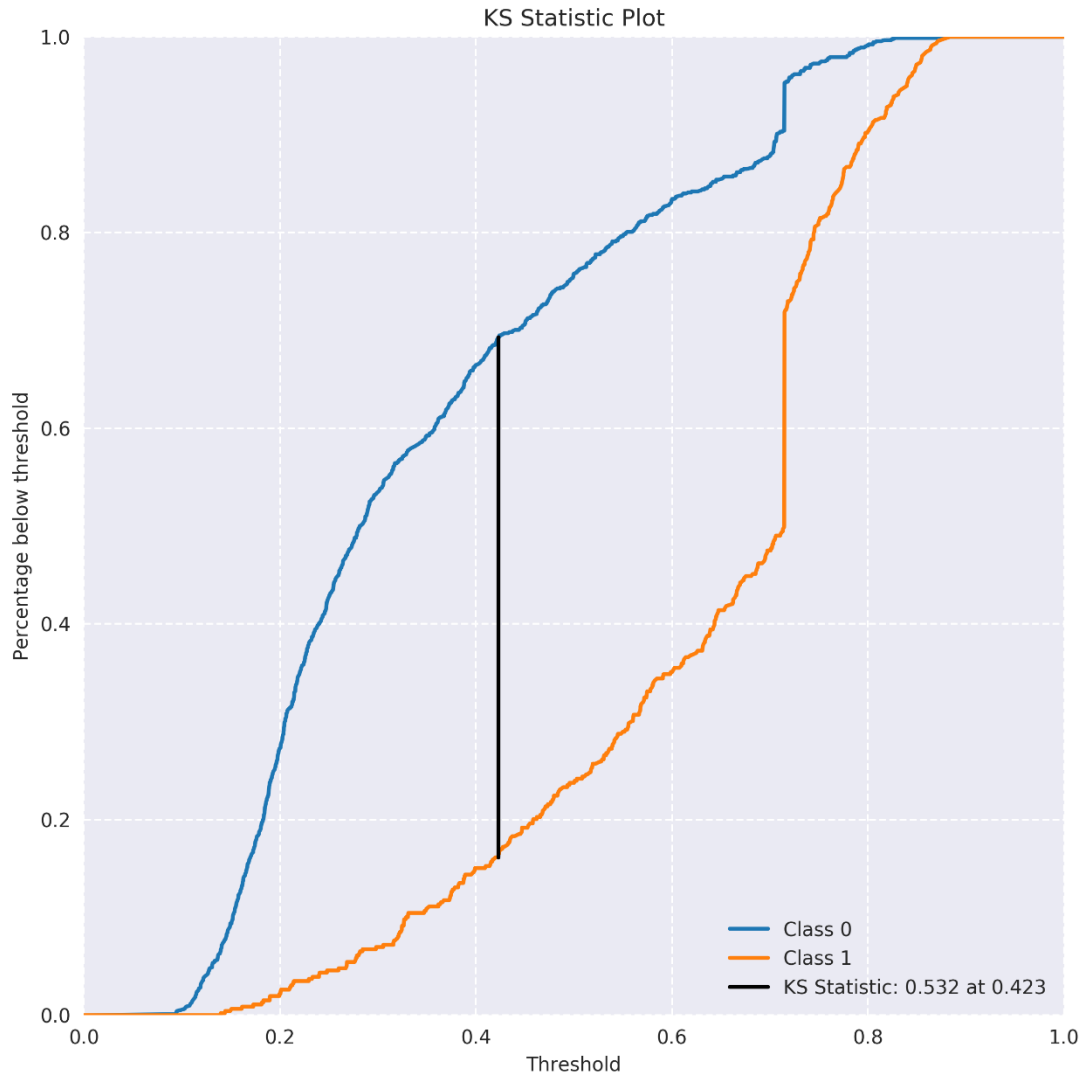

For peer review only

File name: **Table S1.docx**

Title and of Description data: Missing data between three databases in the study and values included in the model.

|                           | SHZJU-ICU | MIMIC | AmsterdamUMC | Including in Model |
|---------------------------|-----------|-------|--------------|--------------------|
| <b>Age</b>                | √         | √     | √            | √                  |
| <b>Gender</b>             | √         | √     | √            | √                  |
| <b>Race</b>               | √         | √     | ×            | ×                  |
| <b>Primary disease</b>    | √         | √     | ×            | ×                  |
| <b>Comorbidity</b>        | √         | √     | ×            | ×                  |
| <b>Ventilation</b>        | √         | √     | √            | √                  |
| <b>Operation</b>          | √         | √     | ×            | ×                  |
| <b>ICU hours</b>          | √         | √     | √            | √                  |
| <b>Survived</b>           | √         | √     | √            | √                  |
| <b>Vital sign</b>         |           |       |              |                    |
| <b>Temperature</b>        | √         | √     | √            | √                  |
| <b>Systolic pressure</b>  | √         | √     | √            | √                  |
| <b>Diastolic pressure</b> | √         | √     | √            | √                  |
| <b>Respiratory rate</b>   | √         | √     | √            | √                  |
| <b>Heart rate</b>         | √         | √     | √            | √                  |
| <b>Oxygen saturation</b>  | √         | √     | √            | √                  |
| <b>Urine</b>              | √         | √     | √            | √                  |
| <b>GCS score</b>          | √         | ×     | ×            | ×                  |
| <b>Laboratory results</b> |           |       |              |                    |
| <b>Scr</b>                | √         | √     | √            | √                  |
| <b>BUN</b>                | √         | √     | √            | √                  |
| <b>RBC</b>                | √         | √     | √            | √                  |
| <b>MCV</b>                | √         | √     | √            | √                  |
| <b>Hb</b>                 | √         | √     | √            | √                  |
| <b>WBC</b>                | √         | √     | √            | √                  |
| <b>NEUT</b>               | √         | √     | √            | √                  |
| <b>PLT</b>                | √         | √     | √            | √                  |
| <b>HCV</b>                | √         | √     | ×            | ×                  |
| <b>TBLB</b>               | √         | √     | √            | √                  |
| <b>DBLB</b>               | √         | √     | √            | √                  |
| <b>IBLB</b>               | √         | √     | √            | √                  |
| <b>CRP</b>                | √         | √     | √            | √                  |
| <b>PCT</b>                | √         | ×     | ×            | ×                  |
| <b>Serum kalium</b>       | √         | √     | √            | √                  |
| <b>Serum natrium</b>      | √         | √     | √            | √                  |
| <b>Serum chlorine</b>     | √         | √     | √            | √                  |

|                   |   |   |   |   |
|-------------------|---|---|---|---|
| PT                | √ | √ | √ | √ |
| APTT              | √ | √ | √ | √ |
| INR               | √ | √ | √ | √ |
| CK                | √ | √ | √ | √ |
| LDH               | √ | √ | √ | √ |
| Troponin          | √ | √ | √ | √ |
| Blood glucose     | √ | √ | √ | √ |
| PH                | √ | √ | √ | √ |
| Lactic acid       | √ | √ | √ | √ |
| Anion gap         | √ | √ | √ | √ |
| ABC               | √ | √ | √ | √ |
| SBC               | √ | √ | √ | √ |
| PaCO <sub>2</sub> | √ | √ | √ | √ |
| PaO <sub>2</sub>  | √ | √ | √ | √ |

SHZJU-ICU: The general ICU database of the second affiliated hospital of Zhejiang university school of medicine; MIMIC: Medical Information Mart for Intensive Care; APTT: Activated partial thromboplastin time; INR: International normalized ratio; LDH: Lactate dehydrogenase; PaCO<sub>2</sub>: Partial pressure of carbon dioxide; PaO<sub>2</sub> Partial pressure of oxygen; MCV: Mean corpuscular volume; PH: Potential of hydrogen; WBC: White blood cell count; NEUT: Proportion of neutrophils; CK: Creatine kinase; Scr: Serum Creatinine; BUN: Blood urea nitrogen; RBC: Red blood cell count; Hb: Hemoglobin; PT: Prothrombin time; TBLB: Total bilirubin; DBLB: Direct bilirubin; IBLB: Indirect bilirubin; CRP: C-reactive protein; HCV: Hematocrit value; PCT: Procalcitonin; ABC: Actual Bicarbonate Radical; SBC: Standard Bicarbonate Radical; PLT: Platelet count

File name: **Table S2.docx**

Title and of Description data: Clinical Demographics and Outcomes of SHZJU-ICU patients in model

building set and prospective validation.

|                                         | SHZJU-ICU<br>Negative<br>(N=5695) | SHZJU-ICU<br>Severe AKI<br>(N=766) | P-value | SHZJU-ICU<br>Prospective<br>Negative<br>(N=2188) | SHZJU-ICU<br>Prospective<br>Positive<br>(N=344) | P-value |
|-----------------------------------------|-----------------------------------|------------------------------------|---------|--------------------------------------------------|-------------------------------------------------|---------|
| <b>Age, median [IQR]</b>                | 60.5<br>[48.8-70.1]               | 62.1<br>[50.1-72.5]                | 0.004   | 61.3<br>[47.5-73.4]                              | 62.1<br>[51.2-70.5]                             | 0.03    |
| <b>Gender, male (%)</b>                 | 3561 (64.9)                       | 438 (59.8)                         | 0.007   | 1365 (62.4)                                      | 207 (60.2)                                      | 0.438   |
| <b>Race</b>                             |                                   |                                    |         |                                                  |                                                 |         |
| <b>White</b>                            | 3 (0.05)                          | 1 (0.1)                            | 1       | 2 (0.001)                                        | 0                                               | 1       |
| <b>Black</b>                            | 1 (0.02)                          | 0                                  | 1       | 0                                                | 0                                               | 1       |
| <b>Asian</b>                            | 5691(99.9)                        | 764 (99.7)                         | 1       | 2185 (99.9)                                      | 344(100)                                        | 1       |
| <b>Other</b>                            | 0                                 | 1 (0.1)                            | 1       | 1 (0.001)                                        | 0                                               | 1       |
| <b>Admission Scr (mg/dL), mean (sd)</b> | 0.9 (0.34)                        | 1.0 (0.40)                         | <0.001  | 0.8 (0.32)                                       | 0.9 (0.35)                                      | <0.001  |
| <b>Admission BUN (mg/dL), mean (sd)</b> | 18 (11)                           | 21 (9)                             | <0.001  | 17 (11)                                          | 20 (10)                                         | 0.007   |
| <b>Cancer, n (%)</b>                    | 644 (11.3)                        | 48 (6.3)                           | <0.001  | 230 (10.5)                                       | 26 (7.6)                                        | 0.102   |
| <b>Cirrhosis, n (%)</b>                 | 43 (0.8)                          | 6 (0.8)                            | 0.89    | 15 (0.7)                                         | 3 (0.8)                                         | 0.726   |
| <b>Cardiopathy, n (%)</b>               | 231 (4.1)                         | 42 (5.5)                           | 0.08    | 98 (4.5)                                         | 19 (5.7)                                        | 0.403   |
| <b>Diabetes, n (%)</b>                  | 305 (5.4)                         | 63 (8.2)                           | 0.002   | 142 (6.5)                                        | 29 (8.6)                                        | 0.203   |
| <b>Hypertension, n (%)</b>              | 889 (15.6)                        | 115 (15.0)                         | 0.70    | 324(14.8)                                        | 56 (16.4)                                       | 0.466   |
| <b>Ventilation, n (%)</b>               | 2569 (45.1)                       | 592 (77.3)                         | <0.001  | 1102 (50.4)                                      | 239 (69.5)                                      | <0.001  |
| <b>Operation, n (%)</b>                 | 3361 (59.1)                       | 373 (48.7)                         | <0.001  | 1234(56.4)                                       | 160 (46.7)                                      | 0.001   |
| <b>ICU Hours, median [IQR]</b>          | 50.8<br>[23.0-139.5]              | 164.4<br>[70.3-328.6]              | <0.001  | 58.7<br>[34.2-160.4]                             | 145.6<br>[68.5-314.8]                           | <0.001  |
| <b>Survived, n (%)</b>                  | 4997 (87.7)                       | 380 (49.6)                         | <0.001  | 1868 (85.4)                                      | 178 (51.9)                                      | <0.001  |

SHZJU-ICU: The general ICU database of the second affiliated hospital of Zhejiang university school of medicine; MIMIC: Medical Information Mart for Intensive Care; IQR: Inter-Quartile Range; ICU: Intensive Care Unit; AKI: Acute Kidney Injury. Scr: serum creatinine; BUN: blood urea nitrogen.



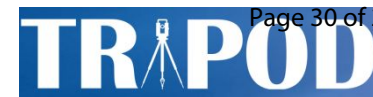

## TRIPOD Checklist: Prediction Model Development and Validation

| 1Section/Topic               | Item | Checklist Item                                                                                                                                                                                            | Page                            |
|------------------------------|------|-----------------------------------------------------------------------------------------------------------------------------------------------------------------------------------------------------------|---------------------------------|
| <b>Title and abstract</b>    |      |                                                                                                                                                                                                           |                                 |
| Title                        | 1    | D;V Identify the study as developing and/or validating a multivariable prediction model, the target population, and the outcome to be predicted.                                                          | Yes; P1                         |
| Abstract                     | 2    | D;V Provide a summary of objectives, study design, setting, participants, sample size, predictors, outcome, statistical analysis, results, and conclusions.                                               | Yes; P2                         |
| <b>Introduction</b>          |      |                                                                                                                                                                                                           |                                 |
| Background and objectives    | 3a   | D;V Explain the medical context (including whether diagnostic or prognostic) and rationale for developing or validating the multivariable prediction model, including references to existing models.      | Yes; P3                         |
|                              | 3b   | D;V Specify the objectives, including whether the study describes the development or validation of the model or both.                                                                                     | Yes; P4, L76-79                 |
| <b>Methods</b>               |      |                                                                                                                                                                                                           |                                 |
| Source of data               | 4a   | D;V Describe the study design or source of data (e.g., randomized trial, cohort, or registry data), separately for the development and validation data sets, if applicable.                               | Yes; P4, L83-92                 |
|                              | 4b   | D;V Specify the key study dates, including start of accrual; end of accrual; and, if applicable, end of follow-up.                                                                                        | Yes; P4, L83-100                |
| Participants                 | 5a   | D;V Specify key elements of the study setting (e.g., primary care, secondary care, general population) including number and location of centres.                                                          | Yes                             |
|                              | 5b   | D;V Describe eligibility criteria for participants.                                                                                                                                                       | Yes; P4, L103                   |
|                              | 5c   | D;V Give details of treatments received, if relevant.                                                                                                                                                     | NA                              |
| Outcome                      | 6a   | D;V Clearly define the outcome that is predicted by the prediction model, including how and when assessed.                                                                                                | Yes; P6, L111                   |
|                              | 6b   | D;V Report any actions to blind assessment of the outcome to be predicted.                                                                                                                                | NA                              |
| Predictors                   | 7a   | D;V Clearly define all predictors used in developing or validating the multivariable prediction model, including how and when they were measured.                                                         | Yes; P6, L116                   |
|                              | 7b   | D;V Report any actions to blind assessment of predictors for the outcome and other predictors.                                                                                                            | NA                              |
| Sample size                  | 8    | D;V Explain how the study size was arrived at.                                                                                                                                                            | NA                              |
| Missing data                 | 9    | D;V Describe how missing data were handled (e.g., complete-case analysis, single imputation, multiple imputation) with details of any imputation method.                                                  | Yes; P6, L127                   |
| Statistical analysis methods | 10a  | D Describe how predictors were handled in the analyses.                                                                                                                                                   | Yes; P6, L125                   |
|                              | 10b  | D Specify type of model, all model-building procedures (including any predictor selection), and method for internal validation.                                                                           | Yes; P6, L130-138               |
|                              | 10c  | V For validation, describe how the predictions were calculated.                                                                                                                                           | Yes; P6, L139                   |
|                              | 10d  | D;V Specify all measures used to assess model performance and, if relevant, to compare multiple models.                                                                                                   | Yes; P7, L159                   |
|                              | 10e  | V Describe any model updating (e.g., recalibration) arising from the validation, if done.                                                                                                                 | Yes; P7, L137                   |
| Risk groups                  | 11   | D;V Provide details on how risk groups were created, if done.                                                                                                                                             | Yes; P6, L111                   |
| Development vs. validation   | 12   | V For validation, identify any differences from the development data in setting, eligibility criteria, outcome, and predictors.                                                                           | Yes; P6, L132                   |
| <b>Results</b>               |      |                                                                                                                                                                                                           |                                 |
| Participants                 | 13a  | D;V Describe the flow of participants through the study, including the number of participants with and without the outcome and, if applicable, a summary of the follow-up time. A diagram may be helpful. | Yes; Figure 1                   |
|                              | 13b  | D;V Describe the characteristics of the participants (basic demographics, clinical features, available predictors), including the number of participants with missing data for predictors and outcome.    | Yes, P8, L168-180 and SupTable2 |
|                              | 13c  | V For validation, show a comparison with the development data of the distribution of important variables (demographics, predictors and outcome).                                                          | Yes, SupTable3                  |
| Model development            | 14a  | D Specify the number of participants and outcome events in each analysis.                                                                                                                                 | Yes, P8, L168                   |
|                              | 14b  | D If done, report the unadjusted association between each candidate predictor and outcome.                                                                                                                | Yes, SupTable1                  |
| Model specification          | 15a  | D Present the full prediction model to allow predictions for individuals (i.e., all regression coefficients, and model intercept or baseline survival at a given time point).                             | Yes.                            |
|                              | 15b  | D Explain how to use the prediction model.                                                                                                                                                                | Yes, P9, L196                   |
| Model performance            | 16   | D;V Report performance measures (with CIs) for the prediction model.                                                                                                                                      | Yes, P9, L190                   |
| Model-updating               | 17   | V If done, report the results from any model updating (i.e., model specification, model performance).                                                                                                     | NA                              |
| <b>Discussion</b>            |      |                                                                                                                                                                                                           |                                 |
| Limitations                  | 18   | D;V Discuss any limitations of the study (such as nonrepresentative sample, few events per predictor, missing data).                                                                                      | Yes, P12, L246                  |
| Interpretation               | 19a  | V For validation, discuss the results with reference to performance in the development data, and any other validation data.                                                                               | Yes, P11, L237                  |
|                              | 19b  | D;V Give an overall interpretation of the results, considering objectives, limitations, results from similar studies, and other relevant evidence.                                                        | Yes, P10 L210-245               |
| Implications                 | 20   | D;V Discuss the potential clinical use of the model and implications for future research.                                                                                                                 | Yes, P12, L254                  |
| <b>Other information</b>     |      |                                                                                                                                                                                                           |                                 |
| Supplementary information    | 21   | D;V Provide information about the availability of supplementary resources, such as study protocol, Web calculator, and data sets.                                                                         | Yes                             |
| Funding                      | 22   | D;V Give the source of funding and the role of the funders for the present study.                                                                                                                         | NA                              |

\*Items relevant only to the development of a prediction model are denoted by D, items relating solely to a validation of a prediction model are denoted by V, and items relating to both are denoted D;V. We recommend using the TRIPOD Checklist in conjunction with the TRIPOD Explanation and Elaboration document.
