# Supplementary material for: Severe acute kidney injury predicting model based on transcontinental databases: a single-centre prospective study
Source: PubMed Central journal article supplement — BMJ Open. 2022 Mar 3;12(3):e054092. doi: 10.1136/bmjopen-2021-054092 (PMC8896056; doi:10.1136/bmjopen-2021-054092), 2022-03-03
Supplement: bmjopen-2021-054092supp001.pdf [file bmjopen-2021-054092supp001.pdf]

**Supplemental Figure:**File name: **Figure S1.tif**

Title and Description of data: The variable importance parameter histogram of early diagnosis prediction

models of severe AKI uses a multiple logistic regression algorithm and five machine learning algorithms.

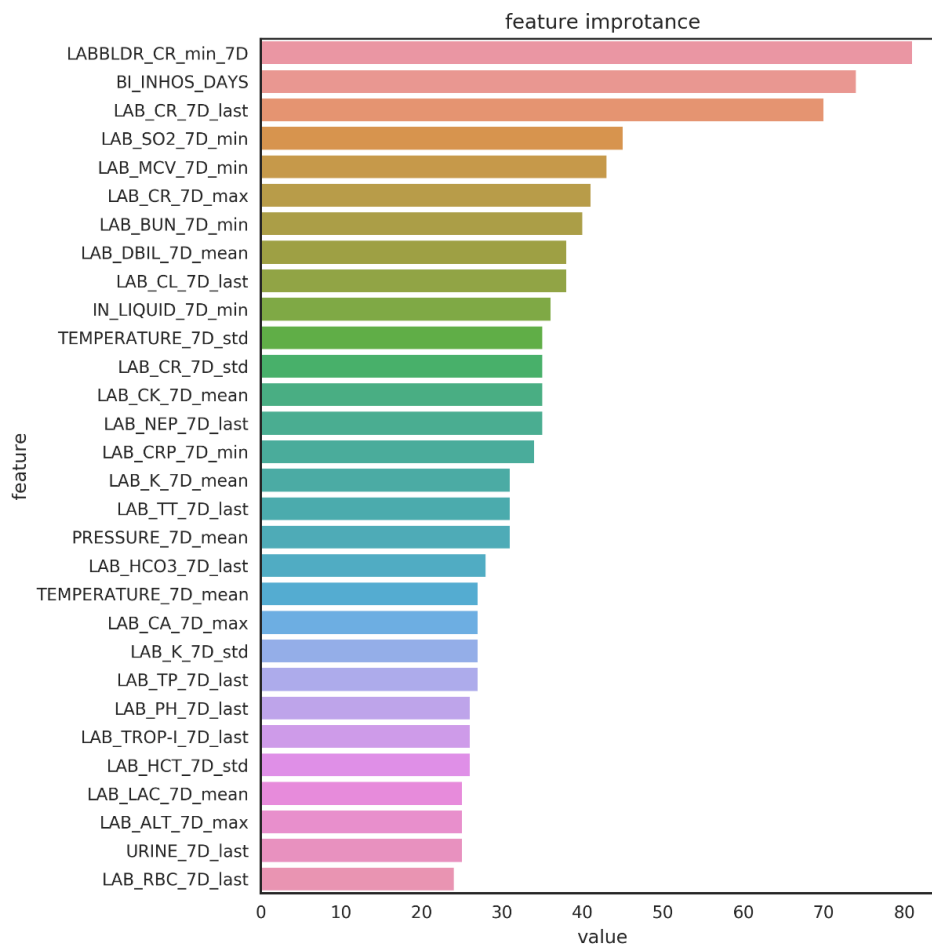File name: **Figure S2.tif**

Title and Description of data: The K-S curve used to determine the cut-off value of positive and negative

diagnosis of early diagnosis prediction models of severe AKI.

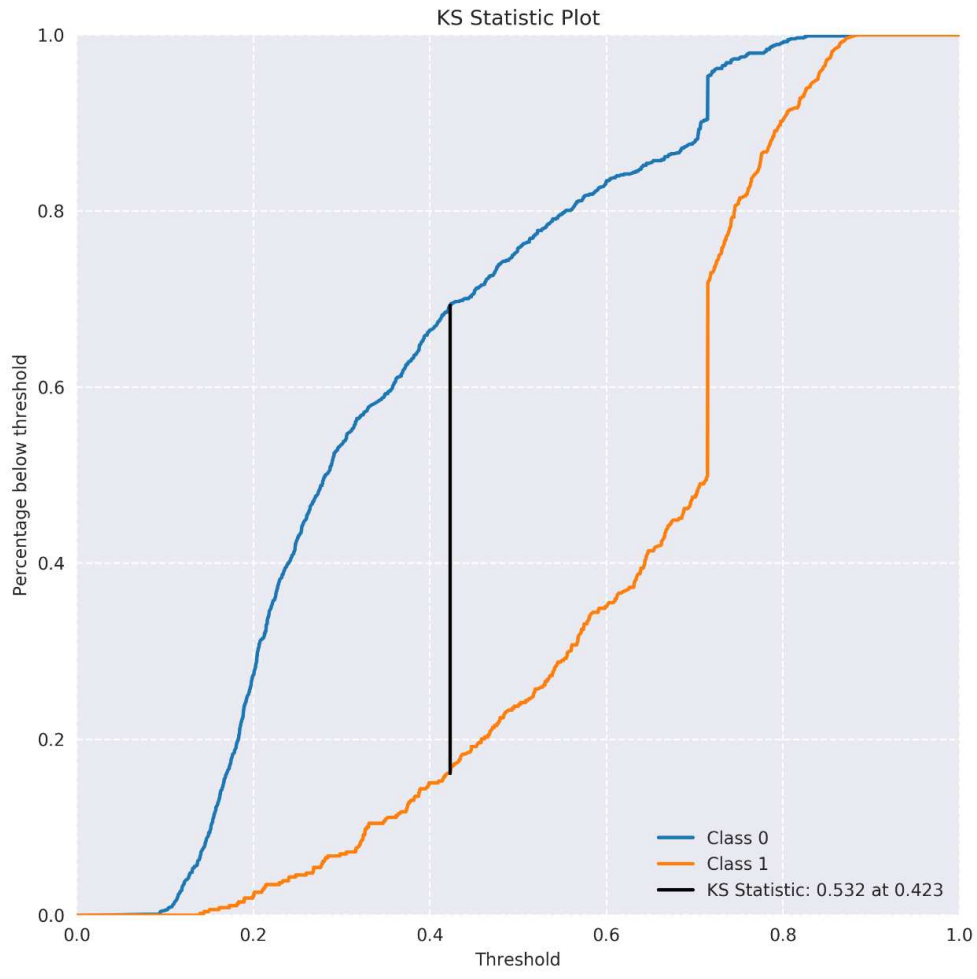

File name: **Table S1.docx**

Title and of Description data: Missing data between three databases in the study and values included in the model.

|                           | SHZJU-ICU | MIMIC | AmsterdamUMC | Including in Model |
|---------------------------|-----------|-------|--------------|--------------------|
| Age                       | √         | √     | √            | √                  |
| Gender                    | √         | √     | √            | √                  |
| Race                      | √         | √     | ×            | ×                  |
| Primary disease           | √         | √     | ×            | ×                  |
| Comorbidity               | √         | √     | ×            | ×                  |
| Ventilation               | √         | √     | √            | √                  |
| Operation                 | √         | √     | ×            | ×                  |
| ICU hours                 | √         | √     | √            | √                  |
| Survived                  | √         | √     | √            | √                  |
| <b>Vital sign</b>         |           |       |              |                    |
| Temperature               | √         | √     | √            | √                  |
| Systolic pressure         | √         | √     | √            | √                  |
| Diastolic pressure        | √         | √     | √            | √                  |
| Respiratory rate          | √         | √     | √            | √                  |
| Heart rate                | √         | √     | √            | √                  |
| Oxygen saturation         | √         | √     | √            | √                  |
| Urine                     | √         | √     | √            | √                  |
| GCS score                 | √         | ×     | ×            | ×                  |
| <b>Laboratory results</b> |           |       |              |                    |
| Scr                       | √         | √     | √            | √                  |
| BUN                       | √         | √     | √            | √                  |
| RBC                       | √         | √     | √            | √                  |
| MCV                       | √         | √     | √            | √                  |
| Hb                        | √         | √     | √            | √                  |
| WBC                       | √         | √     | √            | √                  |
| NEUT                      | √         | √     | √            | √                  |
| PLT                       | √         | √     | √            | √                  |
| HCV                       | √         | √     | ×            | ×                  |
| TBLB                      | √         | √     | √            | √                  |
| DBLB                      | √         | √     | √            | √                  |
| IBLB                      | √         | √     | √            | √                  |
| CRP                       | √         | √     | √            | √                  |
| PCT                       | √         | ×     | ×            | ×                  |
| Serum kalium              | √         | √     | √            | √                  |
| Serum natrium             | √         | √     | √            | √                  |
| Serum chlorine            | √         | √     | √            | √                  |

|                         |   |   |   |   |
|-------------------------|---|---|---|---|
| <b>PT</b>               | √ | √ | √ | √ |
| <b>APTT</b>             | √ | √ | √ | √ |
| <b>INR</b>              | √ | √ | √ | √ |
| <b>CK</b>               | √ | √ | √ | √ |
| <b>LDH</b>              | √ | √ | √ | √ |
| <b>Troponin</b>         | √ | √ | √ | √ |
| <b>Blood glucose</b>    | √ | √ | √ | √ |
| <b>PH</b>               | √ | √ | √ | √ |
| <b>Lactic acid</b>      | √ | √ | √ | √ |
| <b>Anion gap</b>        | √ | √ | √ | √ |
| <b>ABC</b>              | √ | √ | √ | √ |
| <b>SBC</b>              | √ | √ | √ | √ |
| <b>PaCO<sub>2</sub></b> | √ | √ | √ | √ |
| <b>PaO<sub>2</sub></b>  | √ | √ | √ | √ |

SHZJU-ICU: The general ICU database of the second affiliated hospital of Zhejiang university school of medicine; MIMIC: Medical Information Mart for Intensive Care; APTT: Activated partial thromboplastin time; INR: International normalized ratio; LDH: Lactate dehydrogenase; PaCO<sub>2</sub>: Partial pressure of carbon dioxide; PaO<sub>2</sub>: Partial pressure of oxygen; MCV: Mean corpuscular volume; PH: Potential of hydrogen; WBC: White blood cell count; NEUT: Proportion of neutrophils; CK: Creatine kinase; Scr: Serum Creatinine; BUN: Blood urea nitrogen; RBC: Red blood cell count; Hb: Hemoglobin; PT: Prothrombin time; TBLB: Total bilirubin; DBLB: Direct bilirubin; IBLB: Indirect bilirubin; CRP: C-reactive protein; HCV: Hematocrit value; PCT: Procalcitonin; ABC: Actual Bicarbonate Radical; SBC: Standard Bicarbonate Radical; PLT: Platelet count

File name: **Table S2.docx**

Title and of Description data: Clinical Demographics and Outcomes of SHZJU-ICU patients in model

building set and prospective validation.

|                                                 | SHZJU-ICU<br>Negative<br>(N=5695) | SHZJU-ICU<br>Severe AKI<br>(N=766) | P-value | SHZJU-ICU<br>Prospective<br>Negative<br>(N=2188) | SHZJU-ICU<br>Prospective<br>Positive<br>(N=344) | P-value |
|-------------------------------------------------|-----------------------------------|------------------------------------|---------|--------------------------------------------------|-------------------------------------------------|---------|
| <b>Age, median [IQR]</b>                        | 60.5<br>[48.8-70.1]               | 62.1<br>[50.1-72.5]                | 0.004   | 61.3<br>[47.5-73.4]                              | 62.1<br>[51.2-70.5]                             | 0.03    |
| <b>Gender, male (%)</b>                         | 3561 (64.9)                       | 438 (59.8)                         | 0.007   | 1365 (62.4)                                      | 207 (60.2)                                      | 0.438   |
| <b>Race</b>                                     |                                   |                                    |         |                                                  |                                                 |         |
| <b>White</b>                                    | 3 (0.05)                          | 1 (0.1)                            | 1       | 2 (0.001)                                        | 0                                               | 1       |
| <b>Black</b>                                    | 1 (0.02)                          | 0                                  | 1       | 0                                                | 0                                               | 1       |
| <b>Asian</b>                                    | 5691(99.9)                        | 764 (99.7)                         | 1       | 2185 (99.9)                                      | 344(100)                                        | 1       |
| <b>Other</b>                                    | 0                                 | 1 (0.1)                            | 1       | 1 (0.001)                                        | 0                                               | 1       |
| <b>Admission Scr<br/>(mg/dL), mean<br/>(sd)</b> | 0.9 (0.34)                        | 1.0 (0.40)                         | <0.001  | 0.8 (0.32)                                       | 0.9 (0.35)                                      | <0.001  |
| <b>Admission BUN<br/>(mg/dL), mean<br/>(sd)</b> | 18 (11)                           | 21 (9)                             | <0.001  | 17 (11)                                          | 20 (10)                                         | 0.007   |
| <b>Cancer, n (%)</b>                            | 644 (11.3)                        | 48 (6.3)                           | <0.001  | 230 (10.5)                                       | 26 (7.6)                                        | 0.102   |
| <b>Cirrhosis, n (%)</b>                         | 43 (0.8)                          | 6 (0.8)                            | 0.89    | 15 (0.7)                                         | 3 (0.8)                                         | 0.726   |
| <b>Cardiopathy, n<br/>(%)</b>                   | 231 (4.1)                         | 42 (5.5)                           | 0.08    | 98 (4.5)                                         | 19 (5.7)                                        | 0.403   |
| <b>Diabetes, n (%)</b>                          | 305 (5.4)                         | 63 (8.2)                           | 0.002   | 142 (6.5)                                        | 29 (8.6)                                        | 0.203   |
| <b>Hypertension, n<br/>(%)</b>                  | 889 (15.6)                        | 115 (15.0)                         | 0.70    | 324(14.8)                                        | 56 (16.4)                                       | 0.466   |
| <b>Ventilation, n (%)</b>                       | 2569 (45.1)                       | 592 (77.3)                         | <0.001  | 1102 (50.4)                                      | 239 (69.5)                                      | <0.001  |
| <b>Operation, n (%)</b>                         | 3361 (59.1)                       | 373 (48.7)                         | <0.001  | 1234(56.4)                                       | 160 (46.7)                                      | 0.001   |
| <b>ICU Hours,<br/>median [IQR]</b>              | 50.8<br>[23.0-139.5]              | 164.4<br>[70.3-328.6]              | <0.001  | 58.7<br>[34.2-160.4]                             | 145.6<br>[68.5-314.8]                           | <0.001  |
| <b>Survived, n (%)</b>                          | 4997 (87.7)                       | 380 (49.6)                         | <0.001  | 1868 (85.4)                                      | 178 (51.9)                                      | <0.001  |

*SHZJU-ICU*: The general ICU database of the second affiliated hospital of Zhejiang university school of medicine; *MIMIC*: Medical Information Mart for Intensive Care; *IQR*: Inter-Quartile Range; *ICU*: Intensive Care Unit; *AKI*: Acute Kidney Injury. *Scr*: serum creatinine; *BUN*: blood urea nitrogen.
